# Supplementary material for: Enantiopure cycloplatinated pentahelicenic N-heterocyclic carbenic complexes that display long-lived circularly polarized phosphorescence
Source: Royal Society of Chemistry journal article supplement (doi:10.1039/d3dt00577a), 2023-01-01
Supplement: d3dt00577a1.pdf [file d3dt00577a1.pdf]

|                                                      |            |
|------------------------------------------------------|------------|
| <b>S1. Experimental section</b>                      | <b>S2</b>  |
| S1.1. General information                            | <b>S2</b>  |
| S1.2. Synthetic procedures                           | <b>S4</b>  |
| S1.3. NMR spectra                                    | <b>S8</b>  |
| S1.4. Mass spectrometry data                         | <b>S11</b> |
| S1.5. Chiral HPLC separations                        | <b>S14</b> |
| S1.6. X-ray crystallographic data                    | <b>S18</b> |
| S1.7. Photophysical and chiroptical measurements     | <b>S19</b> |
| <b>S2. Computational section</b>                     | <b>S23</b> |
| S2.1. Computational details                          | <b>S23</b> |
| S2.2. Additional calculated data                     | <b>S24</b> |
| S2.3. Cartesian coordinates for optimized structures | <b>S49</b> |
| <b>S3. References</b>                                | <b>S57</b> |

## S1. Experimental section

### S1.1. General information

**Materials and methods:** Experiments were performed using standard Schlenk techniques. Column chromatography purifications were performed in air over silica gel (Macherey Nagel 60 M, 0.04–0.063 mm). Irradiation reactions were conducted using a Heraeus TQ 150 mercury vapor lamp. All reactions were monitored by TLC analysis and visualizations were accomplished by irradiation with a UV light at 254 nm and 356 nm. THF was dried using Na/Benzophenone method. Dry DMSO over molecular sieves and dried acetonitrile were purchased from Sigma-Aldrich and were directly used without any further treatment. Dry toluene was obtained from an MB-SPS-800 distillation machine and was degassed by an argon bubbling for at least 30 minutes before use. Other reagents or solvents were purchased from Sigma-Aldrich, Alfa Aesar, ABCR and Fluorochem, and were used as received unless otherwise noted. Sodium carbonate was dried in a 110 °C oven for several days and stored at the same temperature.

**NMR spectroscopy:**  $^1\text{H}$  and  $^{13}\text{C}\{^1\text{H}\}$  NMR spectra were recorded at room temperature on a Bruker Avance III 400 MHz spectrometer equipped with a tunable BBFO probe. Chemical shifts  $\delta$  are given in ppm, and coupling constants  $J$  in Hz.  $^1\text{H}$  and  $^{13}\text{C}$  NMR chemical shifts were determined using residual signals of the deuterated solvents, either deuterated dichloromethane ( $^1\text{H}$   $\delta$  = 5.32 ppm,  $^{13}\text{C}$   $\delta$  = 54.0 ppm) or deuterated chloroform ( $^1\text{H}$   $\delta$  = 7.26 ppm,  $^{13}\text{C}$   $\delta$  = 77.2 ppm). The terms s, d, t, m indicate respectively singlet, doublet, triplet, multiplet, while dd stands for doublet of doublets. Assignments of proton and carbon signals are based on COSY, edited-HSQC, and HMBC experiments.

**Chiral high-performance liquid chromatography (HPLC):** HPLC was performed at iSm2, Aix Marseille University, in an Agilent Technologies 1260 Infinity with Igloo-Cil ovens, using Jasco OR-1590 and CD-2095 as polarimetric and circular dichroism detectors. The analytical (250 x 4.6 mm) and preparative (250 x 10 mm) columns used were Chiralpak IA for complex **Pt1** and Chiralpak IF for **Pt2**.

**High-resolution mass spectrometry (HR-MS):** HRMS measurements were performed at the CRMPO, University of Rennes 1.

**Polarimetry:** Optical rotations were measured on a Jasco P-2000 polarimeter with a sodium lamp (589 nm) in a 1 cm cell, thermally equilibrated at 25 °C with a Peltier controlled cell holder. Specific rotation parameters are given in  $\text{deg}\cdot\text{mL}\cdot\text{g}^{-1}\cdot\text{dm}^{-1}$ .

**UV-vis spectroscopy and electronic circular dichroism (ECD):** UV-vis spectroscopy measurements were conducted on a Jasco-V630 spectrometer. Electronic circular dichroism (in  $\text{M}^{-1}\cdot\text{cm}^{-1}$ ) was measured on a Jasco J-815 Circular Dichroism Spectrometer IFR140 facility, using the PRISM core (Biogenouest©, UMS Biosit, Université de Rennes 1 - Campus de Villejean-35043 Rennes Cedex, France).

**Luminescence spectroscopy:** Samples for emission measurements in toluene were contained within quartz cuvettes of 1 cm path length modified to allow connection to a high-vacuum line. Degassing was achieved via a minimum of three freeze-pump-thaw cycles whilst connected to the vacuum manifold; final vapour pressure at 77 K was  $< 5 \times 10^{-2}$  mbar, as monitored using a Pirani gauge. Spectra were recorded on a Jobin Yvon Fluoromax-2 spectrofluorimeter with an R928 PMT detector and corrected for the wavelength dependence of the monochromator and detector. Luminescence quantum yields were determined using  $[\text{Ru}(\text{bpy})_3]\text{Cl}_2$  in aqueous solution as the standard ( $\phi = 0.040$ ).<sup>1</sup> The estimated uncertainty in the quoted lifetimes is  $\pm 20\%$  of the value or better. Luminescence lifetimes of the

complexes were measured following excitation of the samples using a microsecond pulsed xenon flashlamp. The emitted light was detected at 90° to the excitation source using a Peltier-cooled R928 PMT, thermoelectrically-cooled to -20 °C and operating in multichannel scaling mode, after passage through a monochromator. The decays were much longer than the instrument response and were analyzed by least-squares tail-fitting to the following equation:

$$I(t) = I(0) \cdot \exp(-kt) + c$$

where  $I(t)$  is the intensity of light detected at time  $t$ ,  $k$  is the first-order rate constant for decay ( $k = 1 / \tau$ ), and  $c$  is a constant reflecting the intrinsic “dark count” during the measurement. The quality of the fit was assessed by referring to the residuals (difference between fit and experimental data). The estimated uncertainty in the quoted lifetimes is  $\pm 10\%$  or better.

Emission spectra and quantum yields of thin films were recorded using a Jobin Yvon Quanta- $\phi$  integrating sphere, operated in conjunction with a Fluorolog spectrometer through the usual of optical fibres. The samples were prepared from toluene solutions of 2 wt% of the Pt(II) complex in PMMA (molecular weight approx. 35000), and dried following drop-casting upon quartz substrates. The sample chamber was purged with nitrogen gas for at least 10 minutes prior to data acquisition; the displacement of oxygen can be readily monitored from the increase and subsequent plateauing of the emission intensity at  $\lambda_{\max}$ . A similar approach was used to measure the lifetimes of the films under inert conditions, the decays being analyzed as described above.

**Circularly polarized luminescence:** Circularly polarized luminescence (CPL) measurements were performed using a home-built CPL spectrofluoropolarimeter (constructed with the help of the JASCO Company). The samples were excited using a 90° geometry with a xenon ozone-free lamp 150 W LS. The concentration of the samples was ca.  $10^{-5}$  M.

**CPL measurements on films:** Circular polarization of luminescence from films was measured using a home-built spectrometer, involving photoelastic modulator (PEM) at 50 kHz, parallel multichannel detection and single photon counting electronics (see Scheme S1.1). In the polarization measurement, the emission collection and photoexcitation were performed in a direction perpendicular to the luminescent layer and with an in-line geometry. Excitation light was depolarized by sending it through an optical fiber. Photon counting detection is used. An electronic gate is used to reject incoming photocurrent pulses during the time intervals in the modulation cycle of the PEM where the modulation depth is not sufficiently deep. This so-called modulation window was set to 50% of the total cycle. Photocurrent pulses that pass the gate are then counted as left circularly polarized ( $N_L$ ) or right circularly polarized ( $N_R$ ) photons. After completing the measurement, the degree of circular polarization is obtained from the total number of L and R photons counted using  $g_{\text{lum}} = 2(N_L - N_R) / (N_L + N_R)$ . The  $g_{\text{lum}}$  values reported are the average of about 60 consecutive measurements lasting each one minute. The error bars represent the standard error of the average  $g_{\text{lum}}$ .

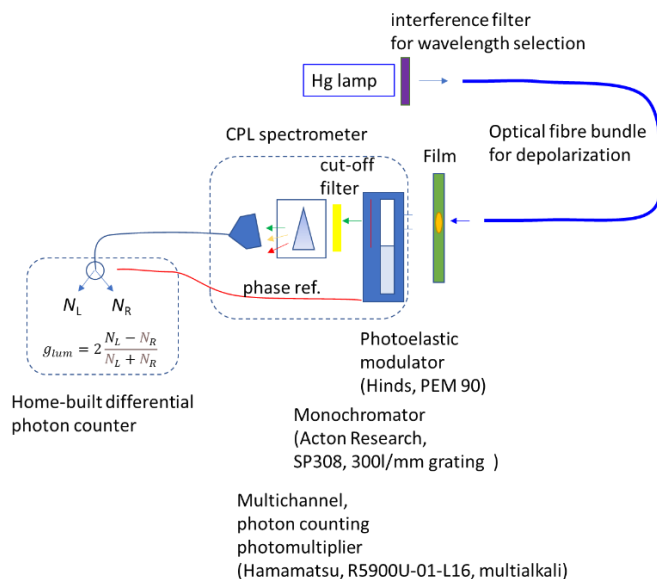

**Scheme S1.1:** Schematic representation of experimental setup for CPL measurement of film.

## S1.2. Synthetic procedures

3*H*-benzo[5,6]phenanthro[3,4-*d*]imidazole **1** was prepared according to the literature.<sup>2</sup> Compounds **2** and **3** were prepared following procedures similar to those previously developed in our group.<sup>3</sup> Synthetic pathway to helicene-NHC-platinum(II) complexes studied in this work is shown in Scheme S1.2.

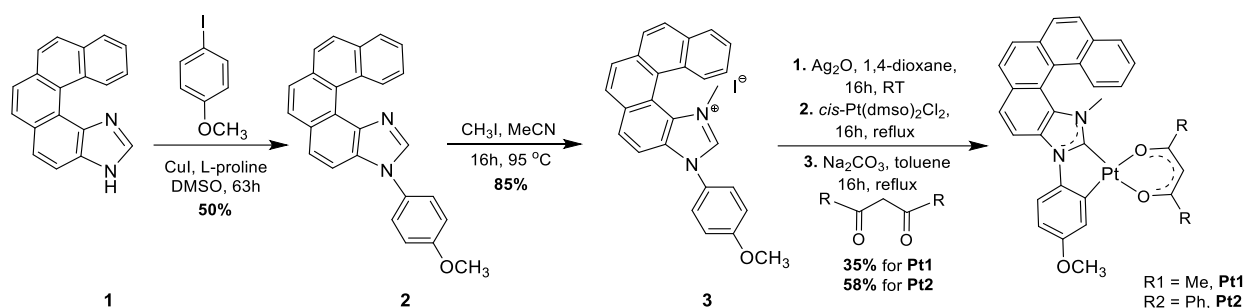

**Scheme S1.2:** General synthetic route to prepare helicene-NHC-platinum(II) complexes studied in this work.

### 3-(4-methoxy-phenyl)-3*H*-benzo[5,6]phenanthro[3,4-*d*]imidazole (**2**)

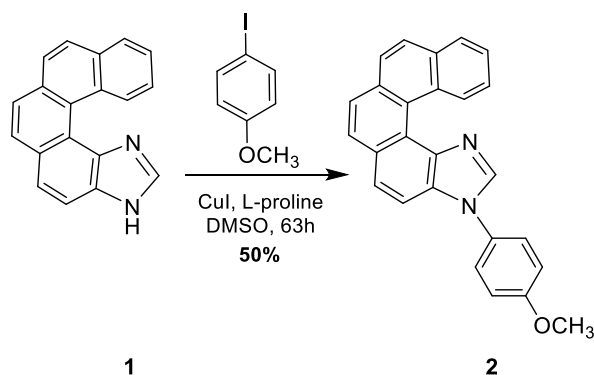

In a flame-dried Schlenk flask equipped with a rubber septum and under argon, **1** (95 mg, 0.35 mmol), 4-iodoanisole (134 mg, 0.44 mmol), dried K<sub>2</sub>CO<sub>3</sub> (145 mg, 1.40 mmol), CuI (7 mg, 0.04 mmol) and L-proline (8 mg, 0.07 mmol) were dissolved in anhydrous dimethylsulfoxide (DMSO, 3 mL). The rubber septum was replaced by a Teflon cap, and the medium was degassed with a freeze/pump/thaw procedure applied three times to ensure an air- and oxygen-free atmosphere. The reaction mixture was then heated at 110 °C for 63 h. The mixture was allowed to cool down to room temperature, and the medium was diluted with distilled water and CH<sub>2</sub>Cl<sub>2</sub>. The aqueous layer was then extracted using CH<sub>2</sub>Cl<sub>2</sub> three times, and the combined organic layers were washed with water twice. The organic phase was dried over MgSO<sub>4</sub>, filtered, and the solvent was evaporated under reduced pressure. The obtained crude was then purified by column chromatography (SiO<sub>2</sub>, *n*-heptane / EtOAc = 8:2 to 1:1) to afford 3-(4-methoxy-phenyl)-3*H*-benzo[5,6]phenanthro[3,4-*d*]imidazole **2** as a white solid (78 mg, 50% yield).

**<sup>1</sup>H NMR (400 MHz, CD<sub>2</sub>Cl<sub>2</sub>, δ ppm):** δ = 3.91 (s, 3H, O-CH<sub>3</sub>), 7.14 (d, *J* = 8.9 Hz, 2H, CH<sub>Ph</sub>), 7.53 (m, *J* = 8.6 Hz, 3H, CH<sub>Ar</sub> + CH<sub>Ph</sub>), 7.61 (t, *J* = 7.7 Hz 1H, CH<sub>Ar</sub>), 7.76 (d, *J* = 8.9 Hz 1H, CH<sub>Ar</sub>), 7.84 (d, *J* = 8.4 Hz, 1H, CH<sub>Ar</sub>), 7.88 (d, *J* = 8.5 Hz, 1H, CH<sub>Ar</sub>), 7.91 - 8.05 (m, 4H, CH<sub>Ar</sub>), 8.09 (s, 1H, N-CH-N), 9.16 (d, *J* = 8.6 Hz, 1H, CH<sub>Ar</sub>).

**<sup>13</sup>C{<sup>1</sup>H} NMR (101 MHz, CDCl<sub>3</sub>, δ ppm):** δ = 56.1 (O-CH<sub>3</sub>), 111.4 (C<sub>Ar</sub>), 115.5 (C<sub>Ph</sub>), 115.5 (C<sub>Ph</sub>), 123.7 (C<sub>Ar</sub>), 124.2 (C<sub>Ar</sub>), 125.4 (C<sub>Ar</sub>), 125.5 (C<sub>Ar</sub>), 126.5 (C<sub>Ar</sub>), 126.6 (C<sub>Ph</sub>), 126.6 (C<sub>Ph</sub>), 126.8 (C<sub>Ar</sub>), 127.2 (C<sub>Ar</sub>), 128.3 (C<sub>Ar</sub>), 128.3 (C<sub>Ar</sub>), 128.4 (C<sub>Ar</sub>), 129.5 (C<sub>Ar</sub>), 130.8 (C<sub>Ar</sub>), 131.2 (C<sub>Ar</sub>), 131.4 (C<sub>Ar</sub>), 132.6 (C<sub>Ar</sub>), 132.9 (C<sub>Ar</sub>), 133.3 (C<sub>Ar</sub>), 139.3 (C<sub>Ar</sub>), 140.7 (N-C<sub>Ph</sub>), 160.0 (s, N-C-N).

**HRMS (ESI):** *m/z* calculated for [C<sub>26</sub>H<sub>19</sub>N<sub>2</sub>O] (M+H<sup>+</sup>): 375.1492; found, 375.1492.

### 1-methyl-3-(4-methoxy-phenyl)-3*H*-benzo[5,6]phenanthro[3,4-*d*]imidazole-1-ium iodide salt (**3**)

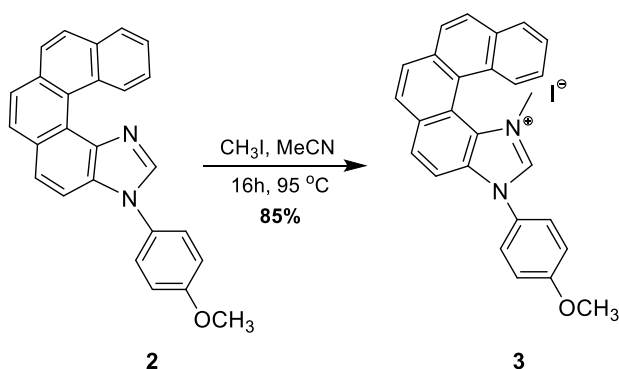

In a flame-dried Schlenk flask, **2** (80 mg, 0.22 mmol) was placed and, after two vacuum/argon cycles, dried acetonitrile (8 mL) was added. Under argon, an excess of methyl iodide (0.15 mL, 2.40 mmol) was added. The reaction mixture was then sealed with a Teflon cap and heated at 95 °C overnight. The resulting heterogeneous mixture was finally allowed to cool down to room temperature, and the solvent was evaporated under vacuum. The obtained solid was washed and triturated three times with ethyl acetate and diethyl ether to afford pure 1-methyl-3-(4-methoxy-phenyl)-3*H*-benzo[5,6]phenanthro[3,4-*d*]imidazole-1-ium iodide salt **3** as a white-off solid (93 mg, 85% yield).

**<sup>1</sup>H NMR (400 MHz, CD<sub>2</sub>Cl<sub>2</sub>, δ ppm):** δ = 3.63 (s, 3H, N-CH<sub>3</sub>), 3.96 (s, 3H, O-CH<sub>3</sub>), 7.31 – 7.21 (m, 2H, CH<sub>Ar</sub>), 7.69 (dd, *J* = 7.0, 1.6 Hz, 2H, CH<sub>Ph</sub>), 7.85 (d, *J* = 8.9 Hz, 1H, CH<sub>Ar</sub>), 7.96 – 8.05 (m, 3H CH<sub>Ar</sub> & C-H<sub>Ph</sub>), 8.06 – 8.17 (m, 4H, CH<sub>Ar</sub>), 8.20 (d, *J* = 8.9 Hz, 1H, CH<sub>Ar</sub>), 8.36 (dd, *J* = 7.6, 1.7 Hz, 1H, CH<sub>Ar</sub>), 10.70 (s, 1H, N-CH-N).

**<sup>13</sup>C {<sup>1</sup>H} NMR:** was not resolved enough due to poor solubility of the compound.

**HRMS (ESI):** *m/z* calculated for [C<sub>27</sub>H<sub>21</sub>N<sub>2</sub>O]<sup>+</sup>: 389.1648; found, 389.1646.

### [5]helicene-NHC cyclometalated platinum(II) complexes (Pt1, Pt2)

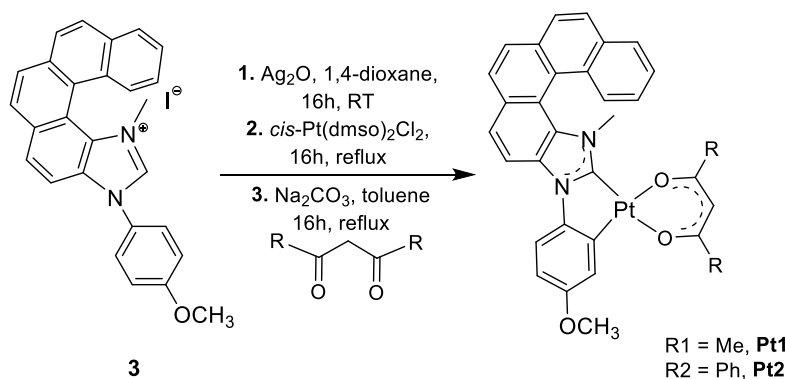

In a flame-dried Schlenk flask equipped with a rubber septum, imidazolium salt **3** (90 mg, 0.17 mmol) and silver(I) oxide (24 mg, 0.11 mmol) were dissolved in 10 mL of 1,4-dioxane and stirred for 16 h at room temperature under argon atmosphere. Freshly prepared *cis*-platinum(II)-bis-dimethylsulfoxide-dichloride (88 mg, 0.18 mmol) was added to the mixture, which was subsequently heated to reflux (110 °C) for 16 h. The solvent was then removed, and the residue was dissolved in 10 mL of toluene. 2,4-pentanedione (100 mg, 1 mmol) or 1,3-diphenyl-1,3-propanedione (224 mg, 1 mmol) and dried sodium carbonate (106 mg, 1.00 mmol) were added, and the reaction mixture was stirred for 16 h at 110 °C. The solvent was then removed, and the residue was washed with water, followed by column chromatography (heptane / ethyl acetate = 90:10) to afford pure platinum complexes as yellow solids, **Pt1** (41 mg, 35% yield) and **Pt2** (80 mg, 58% yield).

#### Compound Pt1:

**<sup>1</sup>H NMR (400 MHz, CD<sub>2</sub>Cl<sub>2</sub>, δ ppm):** δ = 1.85 (s, 3H, CH<sub>3</sub>), 2.08 (s, 3H, CH<sub>3</sub>), 3.37 (s, 3H, N-CH<sub>3</sub>), 3.88 (s, 3H, OCH<sub>3</sub>), 5.53 (s, 1H, CH<sub>acac</sub>), 6.75 (dd, *J* = 8.7, 2.9 Hz, 1H, CH<sub>Ph</sub>), 7.46 (d, *J* = 2.8 Hz, 1H, CH<sub>Ph</sub>), 7.55 (m, 1H, CH<sub>Ar</sub>), 7.62 (m, 2H, CH<sub>Ph</sub> & CH<sub>Ar</sub>), 7.88 – 8.08 (m, 6H, CH<sub>Ar</sub>), 8.32 (d, *J* = 8.7 Hz, 1H, CH<sub>Ar</sub>), 8.34 (d, *J* = 8.4 Hz, 1H, CH<sub>Ar</sub>).

**$^{13}\text{C}\{^1\text{H}\}$  NMR (75 MHz,  $\text{CD}_2\text{Cl}_2$ ,  $\delta$  ppm):**  $\delta$  = 27.9 ( $\text{CH}_3$ ), 28.0 ( $\text{CH}_3$ ), 37.5 (N- $\text{CH}_3$ ), 55.7 (O- $\text{CH}_3$ ), 102.1 ( $\text{CH}_{\text{acac}}$ ), 108.1 ( $\text{CH}_{\text{Ph}}$ ), 111.0 ( $\text{CH}_{\text{Ar}}$ ), 112.8 ( $\text{CH}_{\text{Ph}}$ ), 116.5 ( $\text{C}_{\text{Ar}}$ ), 117.6 ( $\text{CH}_{\text{Ph}}$ ), 124.5 ( $\text{C}_{\text{Ar}}$ ), 125.4 ( $\text{CH}_{\text{Ar}}$ ), 126.0 ( $\text{CH}_{\text{Ar}}$ ), 126.1 ( $\text{CH}_{\text{Ar}}$ ), 126.3 ( $\text{CH}_{\text{Ar}}$ ), 126.8 ( $\text{CH}_{\text{Ar}}$ ), 126.8 ( $\text{CH}_{\text{Ar}}$ ), 128.0 ( $\text{CH}_{\text{Ar}}$ ), 128.6 ( $\text{CH}_{\text{Ar}}$ ), 128.7 ( $\text{CH}_{\text{Ar}}$ ), 128.9 ( $\text{C}_{\text{Ar}}$ ), 131.0 ( $\text{C}_{\text{Ar}}$ ), 131.1 ( $\text{C}_{\text{Ar}}$ ), 131.7 ( $\text{C}_{\text{Ar}}$ ), 132.2 ( $\text{C}_{\text{Ar}}$ ), 132.5 ( $\text{C}_{\text{Ar}}$ ), 133.4 ( $\text{C}_{\text{Ar}}$ ), 142.3 ( $\text{C}_{\text{Ar}}\text{-Pt}$ ), 156.2 ( $\text{C}_{\text{Ar}}\text{-O}$ ), 160.3 ( $\text{C}_{\text{carbene}}\text{-Pt}$ ), 185.4 ( $\text{C}=\text{O}$ ), 186.1 ( $\text{C}=\text{O}$ ).

**HRMS :**  $m/z$  calculated for  $[\text{C}_{32}\text{H}_{26}\text{N}_2\text{O}_3^{195}\text{Pt}]^+$ : 681.1586; found, 681.1590.

#### Compound Pt2:

**$^1\text{H}$  NMR (400 MHz,  $\text{CD}_2\text{Cl}_2$ ,  $\delta$  ppm):**  $\delta$  = 3.44 (s, 3H, N- $\text{CH}_3$ ), 3.93 (s, 3H, O- $\text{CH}_3$ ), 6.79 (dd,  $J$  = 8.1, 2.8 Hz, 1H,  $\text{CH}_{\text{Ph}}$ ), 6.82 (s, 1H,  $\text{CH}_{\text{acac}}$ ), 7.37 (t,  $J$  = 7.5 Hz, 2H,  $\text{CH}_{\text{Ph}}$  &  $\text{CH}_{\text{Ar}}$ ), 7.51 (t,  $J$  = 7.2 Hz, 3H,  $\text{CH}_{\text{dbm}}$  &  $\text{CH}_{\text{Ar}}$ ), 7.59 (m, 2H,  $\text{CH}_{\text{Ar}}$ ), 7.64 (m, 2H,  $\text{CH}_{\text{Ph}}$  &  $\text{CH}_{\text{Ar}}$ ), 7.81 (d,  $J$  = 7.2 Hz, 2H,  $\text{CH}_{\text{dbm}}$ ), 7.91 (d,  $J$  = 8.3 Hz, 1H,  $\text{CH}_{\text{Ar}}$ ), 7.96 (d,  $J$  = 8.5 Hz, 1H,  $\text{CH}_{\text{Ar}}$ ), 8.04 (m, 3H,  $\text{CH}_{\text{Ar}}$ ), , 8.13 (m, 3H,  $\text{CH}_{\text{dbm}}$  &  $\text{CH}_{\text{Ar}}$ ), 8.34 (d,  $J$  = 8.3 Hz, 1H,  $\text{CH}_{\text{Ar}}$ ), 8.42 (d,  $J$  = 8.3 Hz, 1H,  $\text{CH}_{\text{Ar}}$ ).

**$^{13}\text{C}\{^1\text{H}\}$  NMR (101 MHz,  $\text{CD}_2\text{Cl}_2$ ,  $\delta$  ppm):**  $\delta$  = 38.2 (N- $\text{CH}_3$ ), 55.7 (O- $\text{CH}_3$ ), 97.1( $\text{CH}_{\text{acac}}$ ), 109.0 ( $\text{CH}_{\text{Ph}}$ ), 111.1 ( $\text{CH}_{\text{Ar}}$ ), 113.0 ( $\text{CH}_{\text{Ph}}$ ), 116.6 ( $\text{C}_{\text{Ar}}$ ), 117.3 ( $\text{CH}_{\text{Ar}}$ ), 124.5 ( $\text{C}_{\text{Ar}}$ ), 125.5 ( $\text{CH}_{\text{Ar}}$ ), 126.2 ( $\text{CH}_{\text{Ar}}$ ), 126.2 ( $\text{CH}_{\text{Ar}}$ ), 126.4 ( $\text{CH}_{\text{Ar}}$ ), 126.6 ( $\text{C}_{\text{Ar}}$ ), 126.7 ( $\text{CH}_{\text{Ar}}$ ), 127.4 ( $\text{CH}_{\text{dbm}}$ ), 127.4 ( $\text{CH}_{\text{dbm}}$ ), 127.6 ( $\text{CH}_{\text{dbm}}$ ), 127.6 ( $\text{CH}_{\text{dbm}}$ ), 128.1 ( $\text{C}_{\text{Ar}}$ ), 128.7 ( $\text{CH}_{\text{Ar}}$ ), 128.8 ( $\text{CH}_{\text{dbm}}$ ), 128.8 ( $\text{C}_{\text{Ar}}$ ), 128.8 ( $\text{CH}_{\text{dbm}}$ ), 128.8 ( $\text{CH}_{\text{dbm}}$ ), 129.0 ( $\text{CH}_{\text{dbm}}$ ), 129.0 ( $\text{CH}_{\text{dbm}}$ ), 131.2 ( $\text{CH}_{\text{Ar}}$ ), 131.2 ( $\text{C}_{\text{Ar}}$ ), 131.4 ( $\text{CH}_{\text{Ar}}$ ), 131.7 ( $\text{C}_{\text{Ar}}$ ), 132.4 ( $\text{C}_{\text{Ar}}$ ), 132.6 ( $\text{C}_{\text{Ar}}$ ), 133.4 ( $\text{C}_{\text{Ar}}$ ), 133.9 ( $\text{C}_{\text{Ar}}$ ), 140.3 ( $\text{C}_{\text{dbm}}$ ), 140.9 ( $\text{C}_{\text{dbm}}$ ), 142.3 ( $\text{C}_{\text{Ar}}\text{-Pt}$ ), 156.2 ( $\text{C}_{\text{Ar}}\text{-O}$ ), 160.7 ( $\text{C}_{\text{carbene}}\text{-Pt}$ ), 179.9( $\text{C}=\text{O}$ ), 181.0 ( $\text{C}=\text{O}$ ).

**HRMS (ESI):**  $m/z$  calculated for  $[\text{C}_{42}\text{H}_{30}\text{N}_2\text{O}_3^{195}\text{Pt}]^+$ : 805.1899; found, 805.1900.

### S1.3. NMR spectra

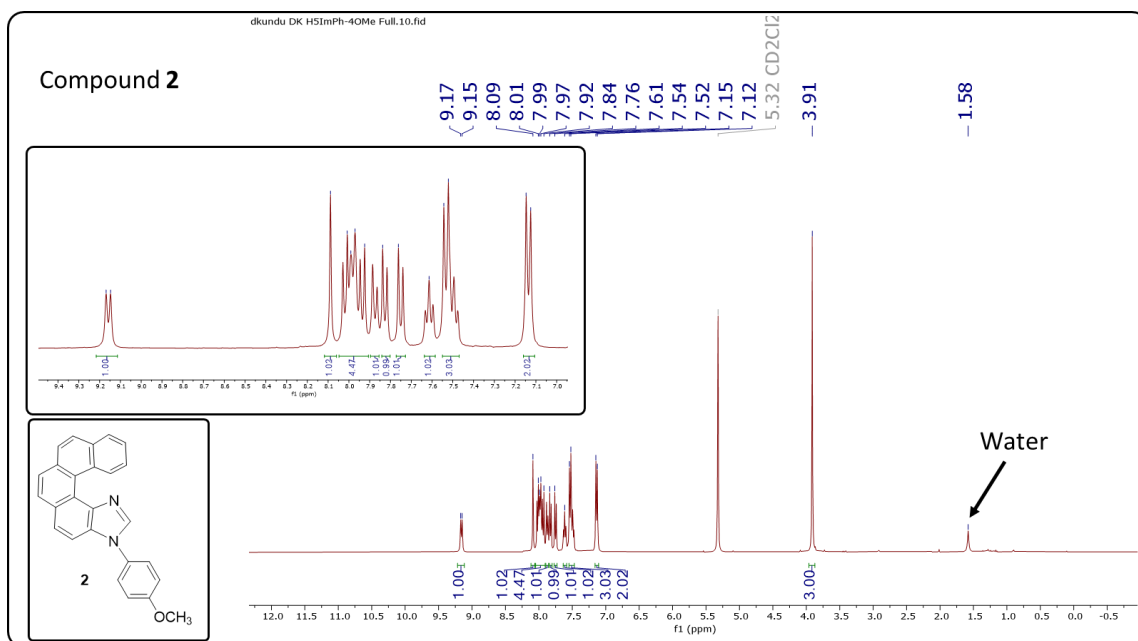

Figure S1.1:  $^1\text{H}$  NMR spectrum of **2** in  $\text{CD}_2\text{Cl}_2$  at 298 K (400 MHz).

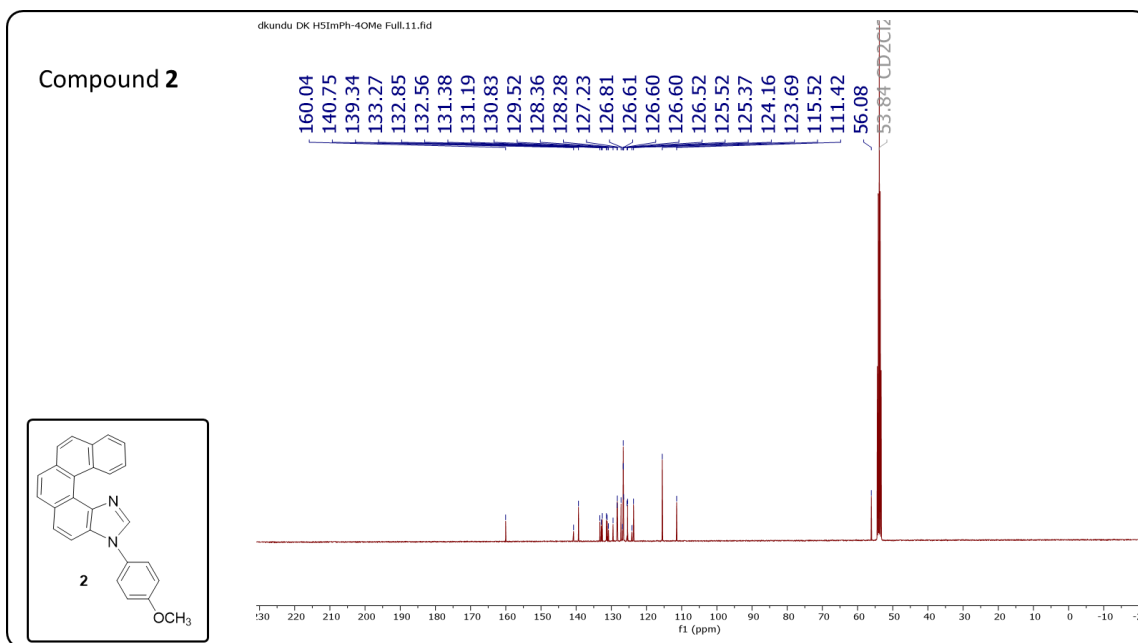

Figure S1.2:  $^{13}\text{C}\{^1\text{H}\}$  NMR spectrum of **2** in  $\text{CD}_2\text{Cl}_2$  at 298 K (101 MHz).



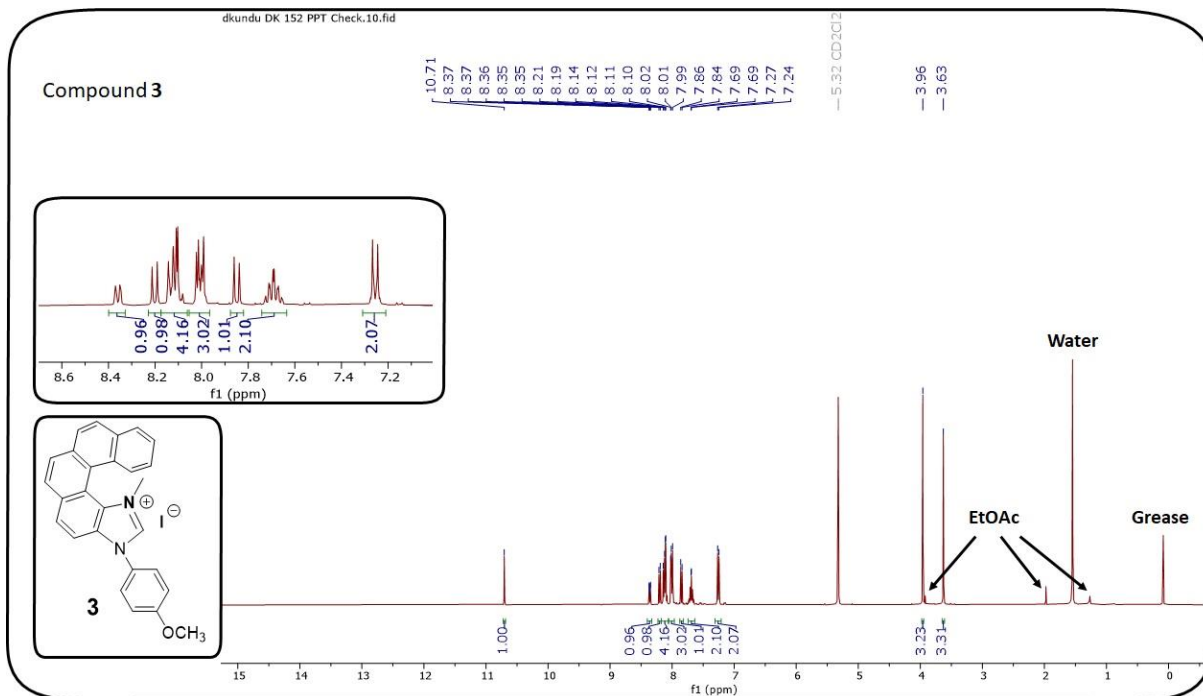

**Figure S1.3:**  $^1\text{H}$  NMR spectrum of **3** in  $\text{CD}_2\text{Cl}_2$  at 298 K (400 MHz).

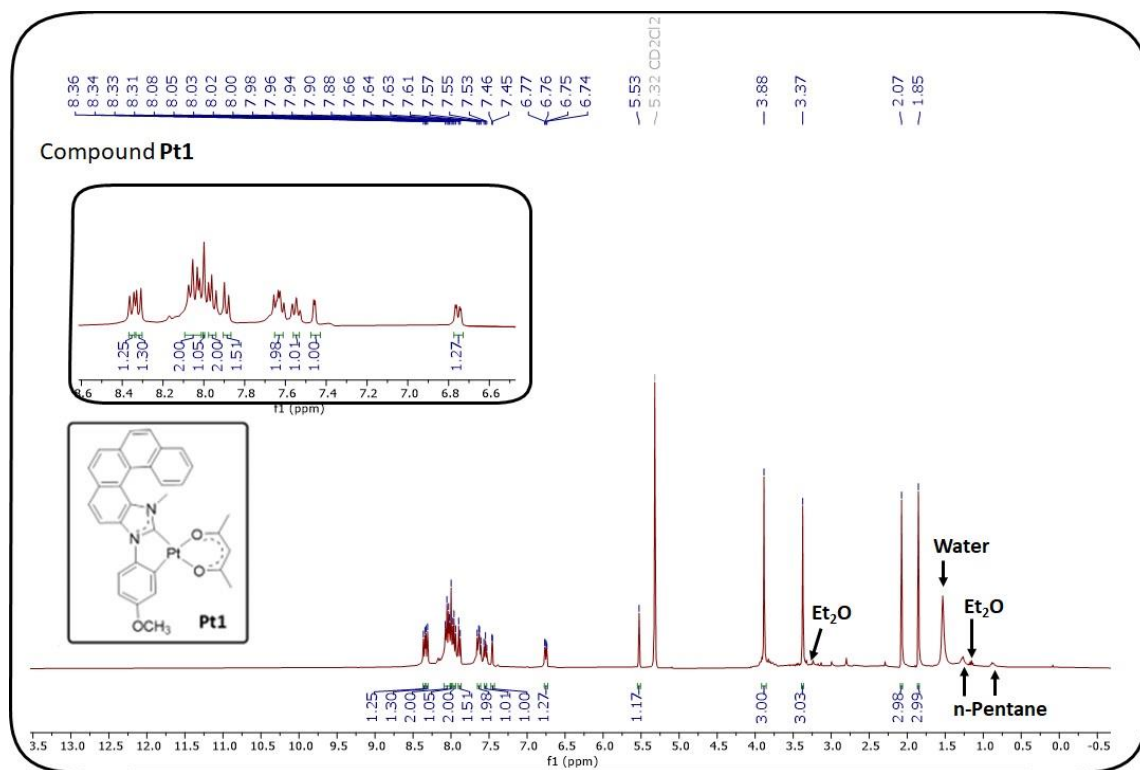

**Figure S1.4:**  $^1\text{H}$  NMR spectrum of **Pt1** in  $\text{CD}_2\text{Cl}_2$  at 298 K (400 MHz). **Note:** The compound is soluble enough in  $\text{CD}_2\text{Cl}_2$  but show low stability and additional signals of lower intensity.

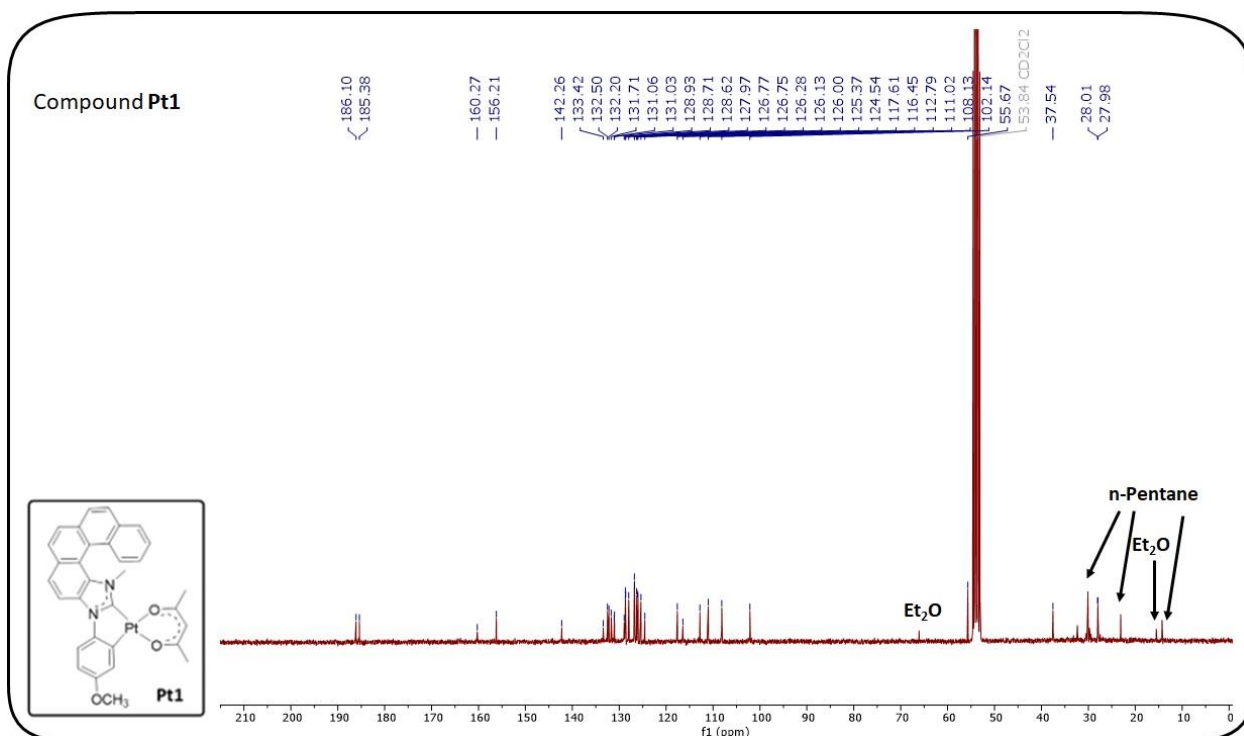

**Figure S1.5:**  $^{13}\text{C}\{^1\text{H}\}$  NMR spectrum of **Pt1** in  $\text{CD}_2\text{Cl}_2$  at 298 K (75 MHz). **Note:** The compound is soluble enough in  $\text{CD}_2\text{Cl}_2$  but show low stability and additional signals of lower intensity.

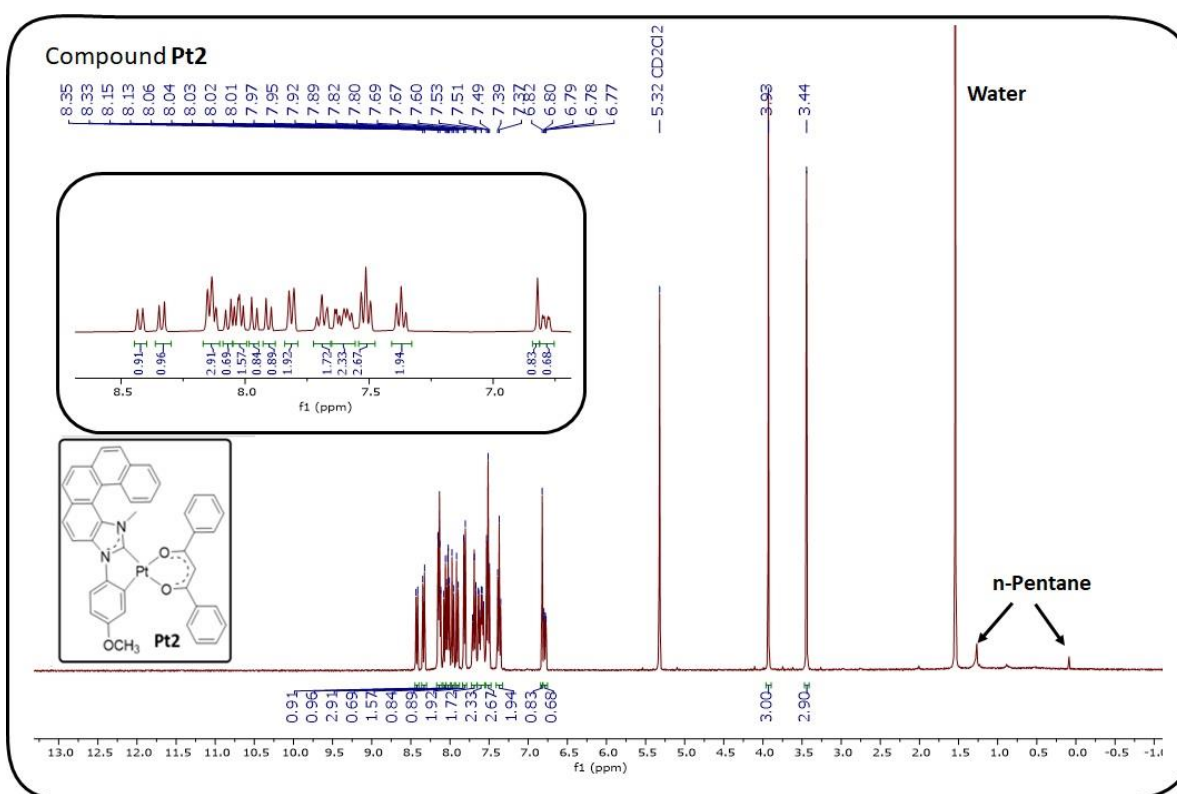

**Figure S1.6:**  $^1\text{H}$  NMR spectrum of **Pt2** in  $\text{CD}_2\text{Cl}_2$  at 298 K (400 MHz).

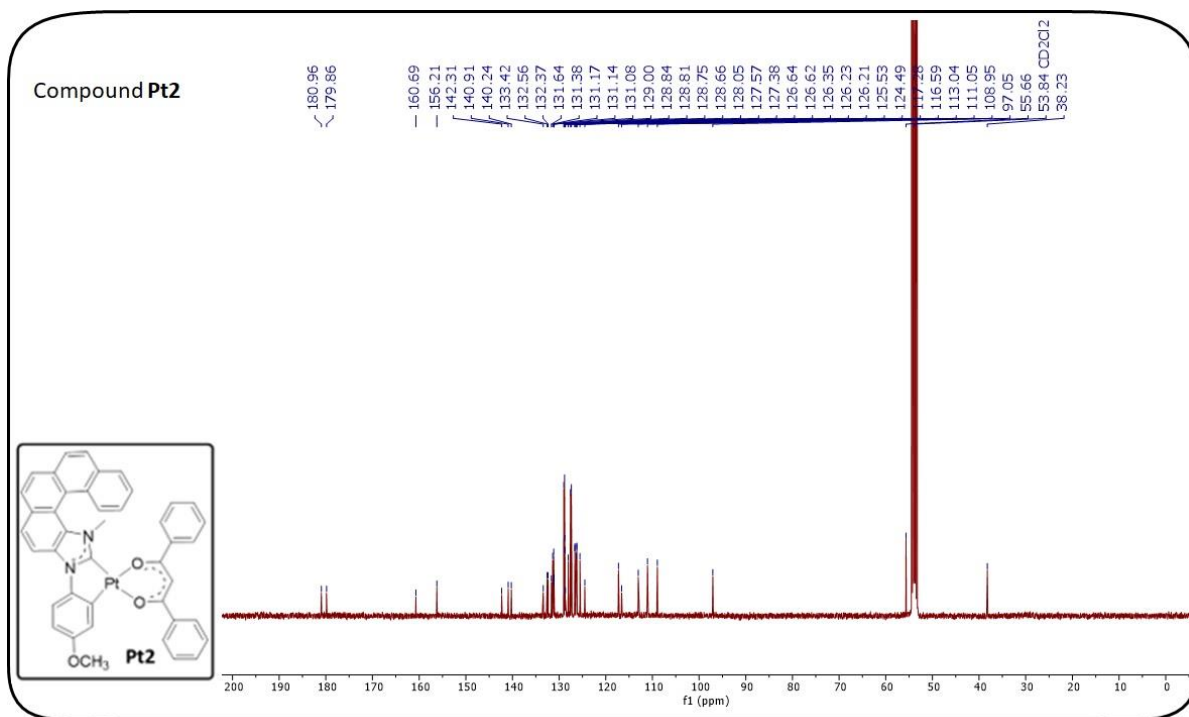

Figure S1.7:  $^{13}\text{C}\{^1\text{H}\}$  NMR spectrum of Pt2 in  $\text{CD}_2\text{Cl}_2$  at 298 K (101 MHz).

#### S1.4. Mass spectrometry data

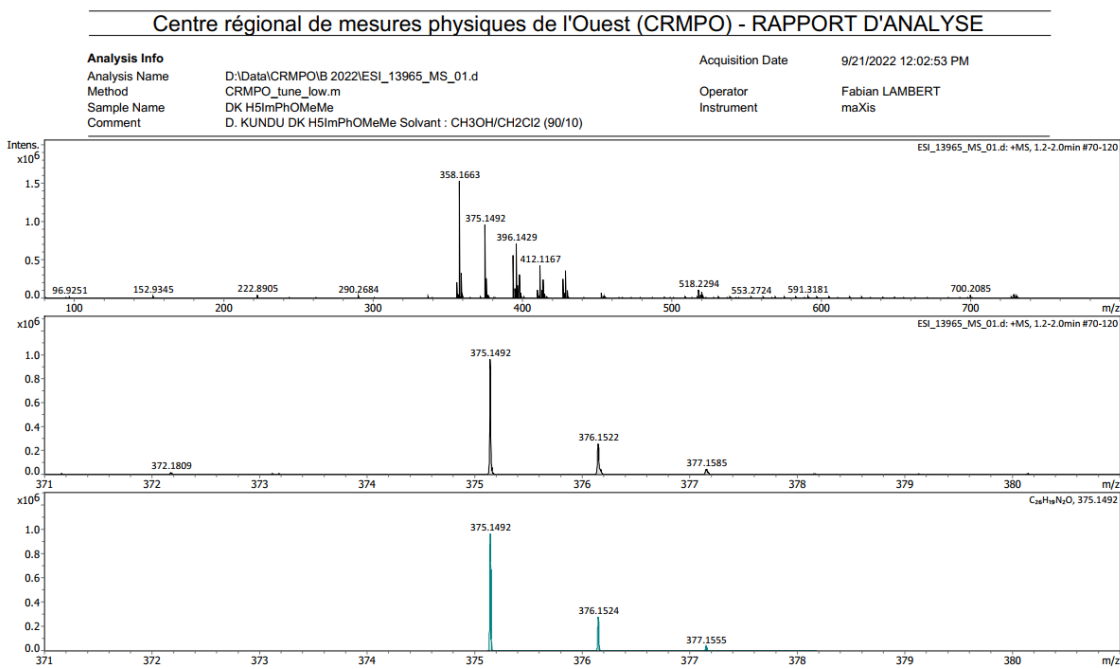

Figure S1.8: High Resolution Mass Spectrometry analysis of 2.

Centre régional de mesures physiques de l'Ouest (CRMPO) - RAPPORT D'ANALYSE

|                      |                                                     |                  |                       |
|----------------------|-----------------------------------------------------|------------------|-----------------------|
| <b>Analysis Info</b> |                                                     | Acquisition Date | 11/8/2022 10:37:05 AM |
| Analysis Name        | D:\Data\CRMPO\ESI_14116_MS_01.d                     | Operator         | Bleu/venn LE FRANC    |
| Method               | CRMPO_tune_low.m                                    | Instrument       | maXis                 |
| Sample Name          | DK pt Lig 1                                         |                  |                       |
| Comment              | D. KUNDU DK pt Lig 1 Solvant : CH3OH/CH2Cl2 (90/10) |                  |                       |

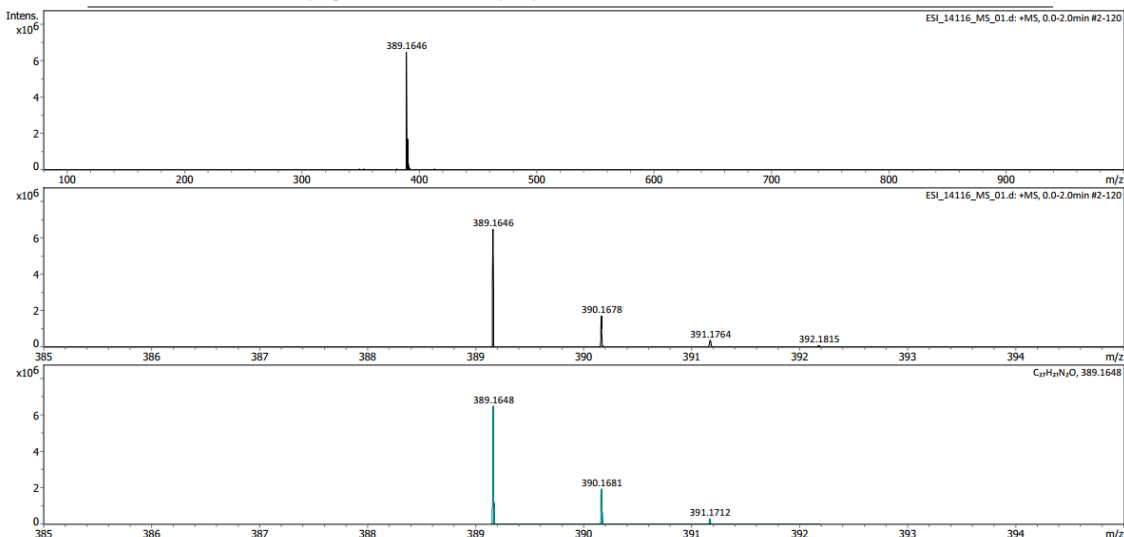

Figure S1.9: High Resolution Mass Spectrometry analysis of **3**.

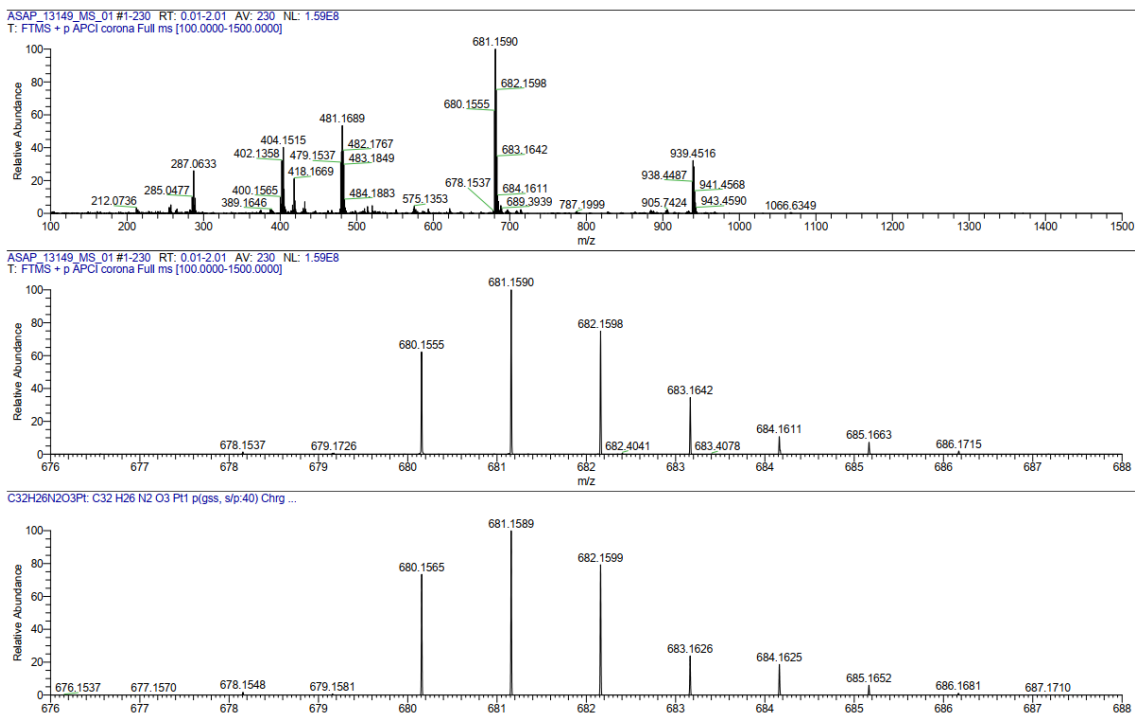

Figure S1.10: High Resolution Mass Spectrometry analysis of **Pt1**.

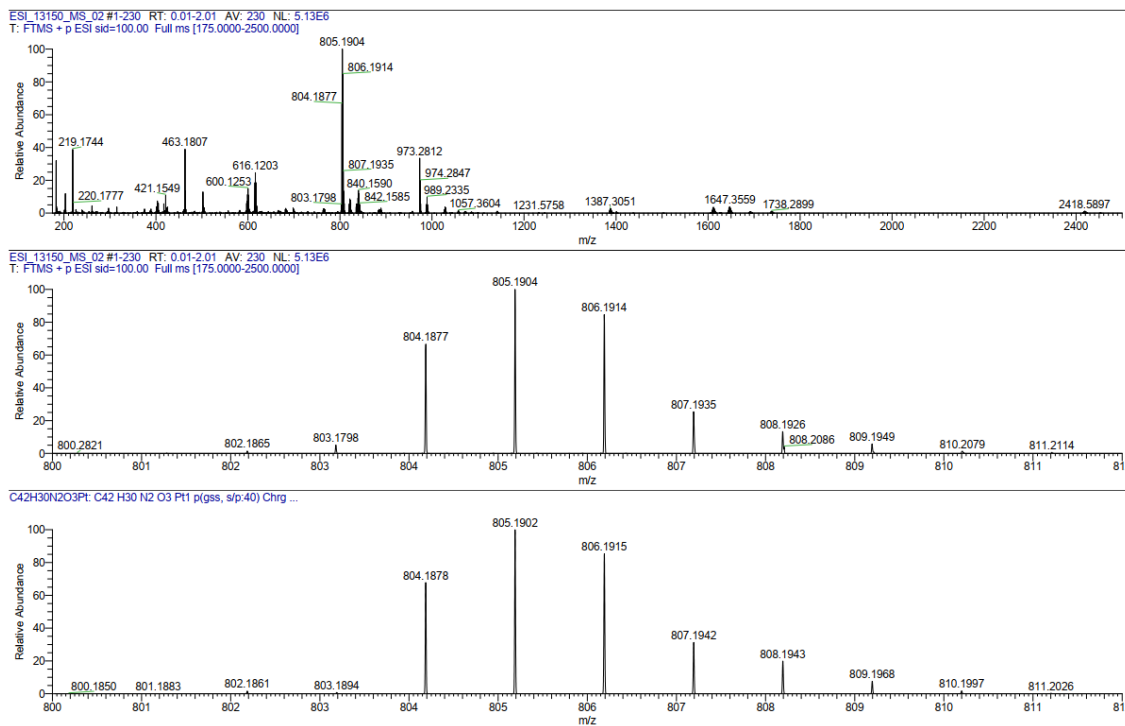

**Figure S1.11: High Resolution Mass Spectrometry analysis of Pt2.**

## S1.5. Chiral HPLC separations

### Analytical chiral HPLC separation for compound **Pt1**

The sample is dissolved in dichloromethane, injected on the chiral column, and detected with a UV detector at 230 nm and a circular dichroism detector at 254 nm. The flow-rate is 1 mL/min.

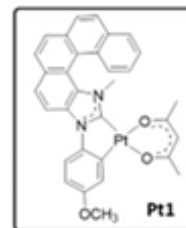

| Column       | Mobile Phase                                  | t1      | k1   | t2       | k2   | $\alpha$ | Rs   |
|--------------|-----------------------------------------------|---------|------|----------|------|----------|------|
| Chiralpak IA | heptane / 2-PrOH / dichloromethane (80/10/10) | 5.92(+) | 1.01 | 7.67 (-) | 1.60 | 1.59     | 4.11 |

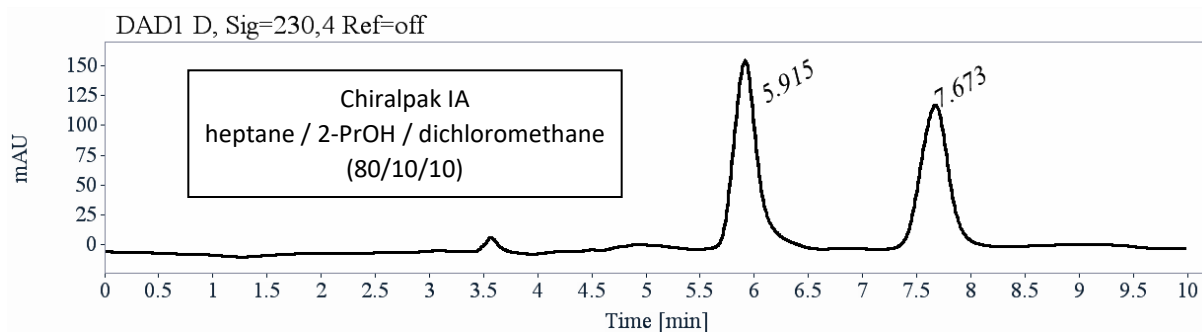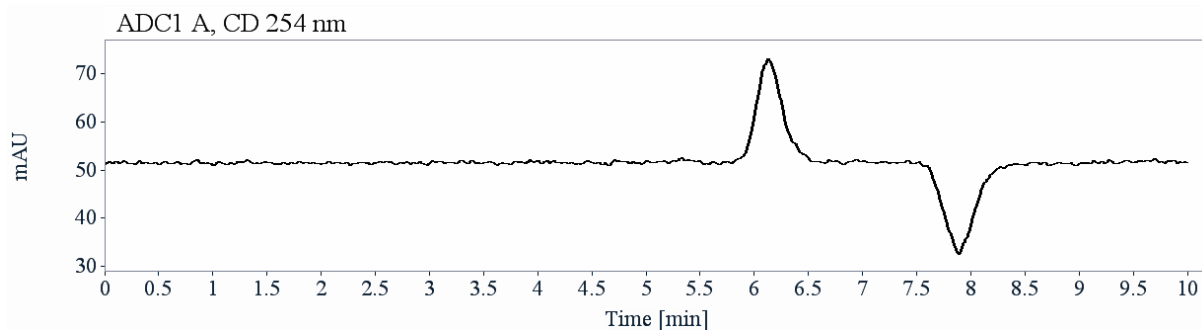

| RT [min] | Area | Area%  | Capacity Factor | Enantioselectivity | Resolution (USP) |
|----------|------|--------|-----------------|--------------------|------------------|
| 5.92     | 2435 | 52.83  | 1.01            |                    |                  |
| 7.67     | 2175 | 47.17  | 1.60            | 1.59               | 4.11             |
| Sum      | 4610 | 100.00 |                 |                    |                  |

### Preparative separation for compound **Pt1**

- Sample preparation: About 20 mg of compound was dissolved in 3.5 mL of dichloromethane.

- Chromatographic conditions: Chiralpak IA (250 x 10 mm), hexane / 2-PrOH / dichloromethane (85/5/10) as mobile phase, flow-rate = 5 mL/min, UV detection at 254 nm.

- Injections (stacked): 14 times 250  $\mu$ L, every 10 minutes.

First fraction: 3.8 mg of the first eluted with *ee* > 99%:

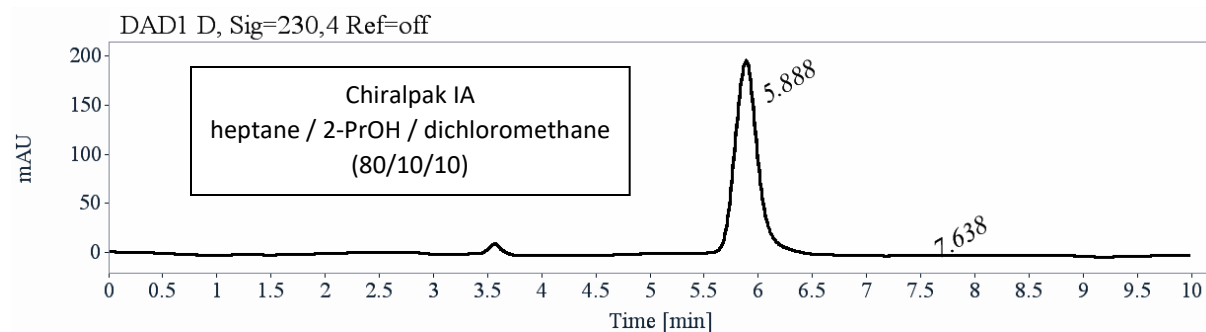

| RT [min] | Area | Area%  |
|----------|------|--------|
| 5.89     | 2897 | 99.71  |
| 7.64     | 9    | 0.29   |
| Sum      | 2906 | 100.00 |

Second fraction: 4.6 mg of the second eluted with *ee* > 98%:

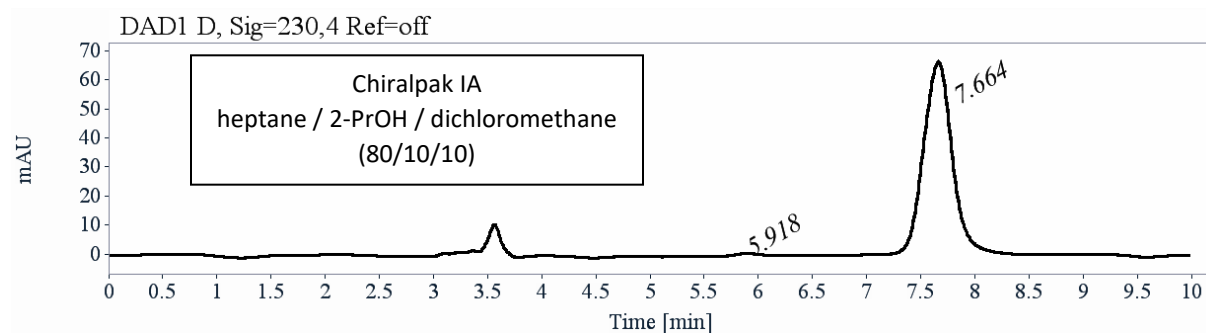

| RT [min] | Area | Area%  |
|----------|------|--------|
| 5.92     | 10   | 0.82   |
| 7.66     | 1232 | 99.18  |
| Sum      | 1242 | 100.00 |

### Analytical chiral HPLC separation for compound **Pt2**

- The sample is dissolved in dichloromethane, injected on the chiral column, and detected with a UV detector at 230 nm and a circular dichroism detector at 254 nm. The flow-rate is 1 mL/min.

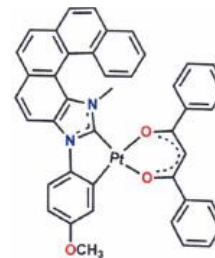

| Column       | Mobile Phase                                   | t <sub>1</sub> | k <sub>1</sub> | t <sub>2</sub> | k <sub>2</sub> | α    | Rs   |
|--------------|------------------------------------------------|----------------|----------------|----------------|----------------|------|------|
| Chiralpak IF | heptane / ethanol / dichloromethane (60/20/20) | 6.34           | 1.15           | 8.54           | 1.90           | 1.65 | 5.20 |

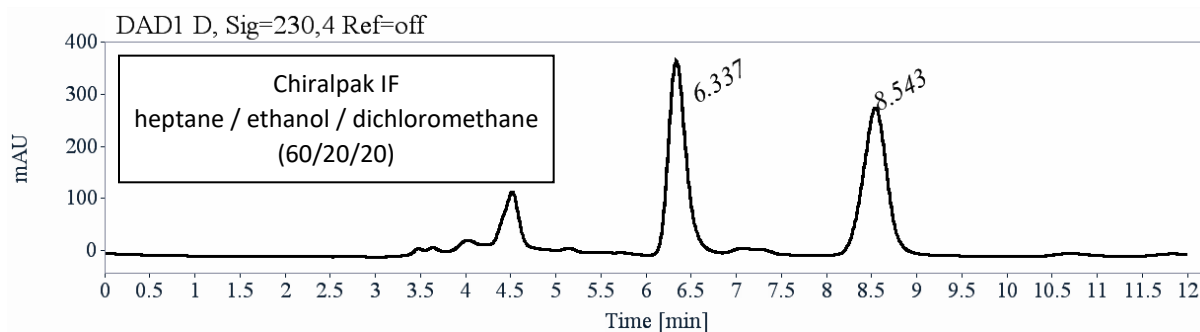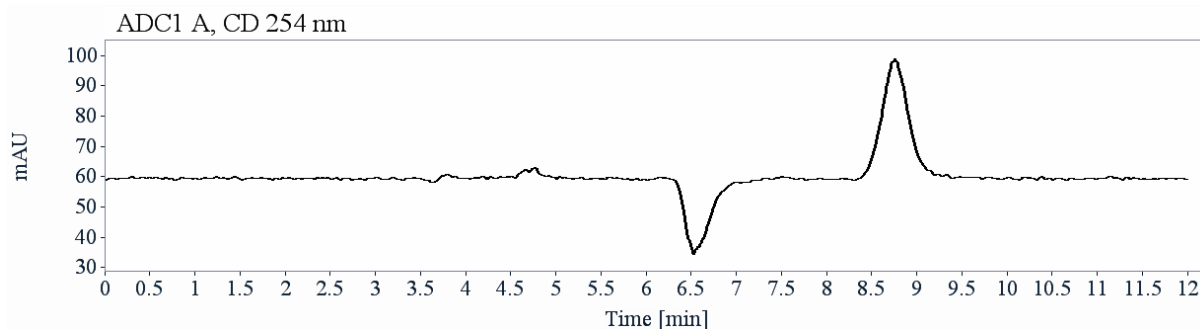

| RT [min] | Area  | Area%  | Capacity Factor | Enantioselectivity | Resolution (USP) |
|----------|-------|--------|-----------------|--------------------|------------------|
| 6.34     | 5055  | 48.73  | 1.15            |                    |                  |
| 8.54     | 5318  | 51.27  | 1.90            | 1.65               | 5.20             |
| Sum      | 10373 | 100.00 |                 |                    |                  |

### Preparative separation for compound **Pt2**

- Sample preparation: About 50 mg of compound was dissolved in 8.8 mL of dichloromethane / ethanol / hexane = 75/5/20.



• Chromatographic conditions: Chiralpak IF (250 x 10 mm), hexane / ethanol / dichloromethane (50/20/20) as mobile phase, flow-rate = 5 mL/min, UV detection at 254 nm.

• Injections (stacked): 35 times 250  $\mu$ L, every 9.5 minutes.

First fraction: 14 mg of the first eluted with  $ee > 99.5\%$ :

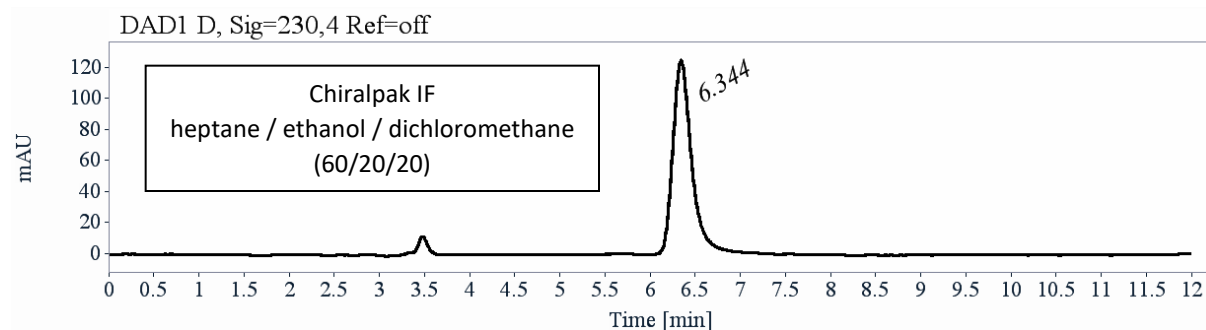

| RT [min] | Area | Area%  |
|----------|------|--------|
| 6.34     | 1772 | 100.00 |
| Sum      | 1772 | 100.00 |

Second fraction: 14 mg of the second eluted with  $ee > 99.5\%$ :

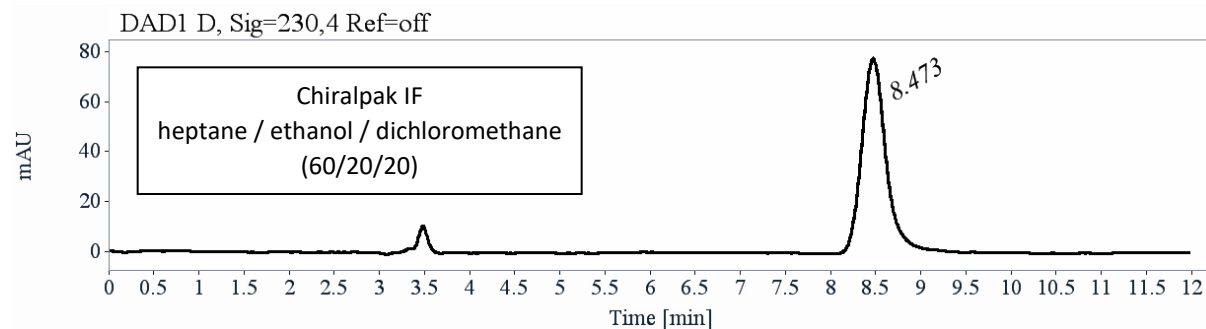

| RT [min] | Area | Area%  |
|----------|------|--------|
| 8.47     | 1482 | 100.00 |
| Sum      | 1482 | 100.00 |

## S1.6. X-ray crystallographic data

The data were collected at low temperature (150 K) on an APEXII Bruker-AXS diffractometer equipped with a CCD-LDI-APEX2 detector, using MoK $\alpha$  radiation ( $\lambda = 0.71073 \text{ \AA}$ ). The structure was solved using SHELXT 2018\_2. All non-hydrogen atoms were refined with SHELXL-2018.

**Table S1.1:** X-ray crystallographic data for *(rac)*-Pt2•CH<sub>2</sub>Cl<sub>2</sub>.

|                                                               | <b>(rac)-Pt2•CH<sub>2</sub>Cl<sub>2</sub></b>                                    |
|---------------------------------------------------------------|----------------------------------------------------------------------------------|
| <b>Empirical Formula</b>                                      | C <sub>43</sub> H <sub>32</sub> Cl <sub>2</sub> N <sub>2</sub> O <sub>3</sub> Pt |
| <b>CCDC number</b>                                            | 2207037                                                                          |
| <b>Formula Weight</b>                                         | 890.69                                                                           |
| <b>Temperature (K)</b>                                        | 150                                                                              |
| <b>Wavelength (Å)</b>                                         | 0.71073                                                                          |
| <b>Crystal system</b>                                         | Triclinic                                                                        |
| <b>Space Group</b>                                            | <i>P</i> -1                                                                      |
| <b>a (Å)</b>                                                  | 10.1129(8)                                                                       |
| <b>b (Å)</b>                                                  | 13.0517(10)                                                                      |
| <b>c (Å)</b>                                                  | 13.8906(9)                                                                       |
| <b><math>\alpha</math> (°)</b>                                | 77.079(2)                                                                        |
| <b><math>\beta</math> (°)</b>                                 | 73.709(2)                                                                        |
| <b><math>\gamma</math> (°)</b>                                | 85.307(2)                                                                        |
| <b>Volume (Å<sup>3</sup>)</b>                                 | 1714.9(2)                                                                        |
| <b>Z</b>                                                      | 2                                                                                |
| <b>Color</b>                                                  | Yellow                                                                           |
| <b><math>d_{\text{calculated}}</math> (g·cm<sup>-3</sup>)</b> | 1.725                                                                            |
| <b>Absorption coefficient (mm<sup>-1</sup>)</b>               | 4.293                                                                            |
| <b>Tmin</b>                                                   | 0.213                                                                            |
| <b>Tmax</b>                                                   | 0.357                                                                            |
| <b>F (000)</b>                                                | 880                                                                              |
| <b>Crystal size (mm)</b>                                      | 0.700 x 0.280 x 0.240                                                            |
| <b><math>\theta</math> range for data collection (°)</b>      | 2.614 to 27.515                                                                  |
| <b>Limiting indices</b>                                       | -13 $\leq$ h $\leq$ 13<br>-16 $\leq$ k $\leq$ 14<br>-18 $\leq$ l $\leq$ 13       |
| <b>Data completeness</b>                                      | 97.8 %                                                                           |
| <b>Reflection collected</b>                                   | 23231                                                                            |
| <b>Reflections uniques</b>                                    | 7713 [R(int) = 0.0517]                                                           |
| <b>Data / restraints / parameters</b>                         | 7713 / 0 / 462                                                                   |
| <b>Goodness-on-fit on <math>F^2</math></b>                    | 1.009                                                                            |
| <b>Final R indices [<math>I &gt; 2\sigma</math>]</b>          | R1 = 0.0310, wR2 = 0.0591                                                        |
| <b>R indices (all data)</b>                                   | R1 = 0.0380, wR2 = 0.0613                                                        |
| <b>Largest diff peak and hole (eÅ<sup>-3</sup>)</b>           | 1.146 and -1.006                                                                 |

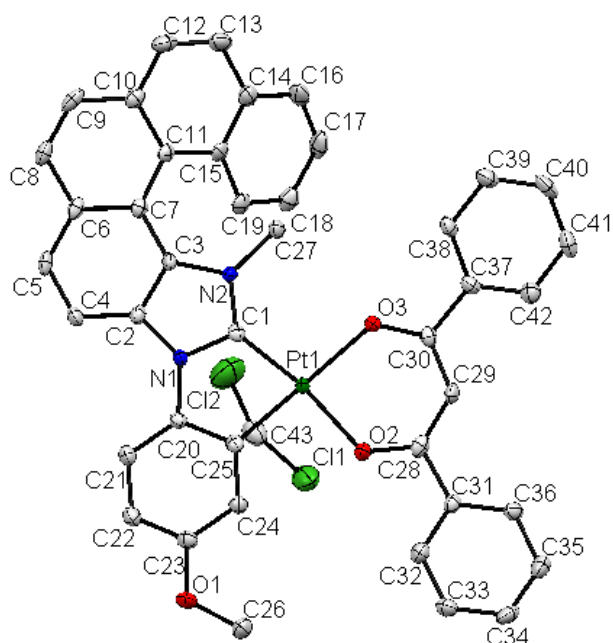

**Figure S1.12:** ORTEP figure (thermal ellipsoids represent 50% probability) from X-ray diffraction experiment for (*rac*)-**Pt2**•CH<sub>2</sub>Cl<sub>2</sub>. Hydrogen atoms are omitted for clarity.

## S1.7. Photophysical and chiroptical measurements

### Optical rotations

The specific optical rotation values for the (*P*) and (*M*) enantiomers of complexes **Pt1** and **Pt2** were measured in toluene ( $C = 1.2$  mg/mL for **Pt1** and 1 mg/mL for **Pt2**) at room temperature.

**Table S1.2:** Specific optical rotation values of **Pt1** and **Pt2** in toluene at 298 K.

|                       | <b>(P)-(+)-Pt1</b> | <b>(M)-(-)-Pt1</b> | <b>(P)-(+)-Pt2</b> | <b>(M)-(-)-Pt2</b> |
|-----------------------|--------------------|--------------------|--------------------|--------------------|
| $[\alpha]_{589}^{25}$ | +952               | -947               | +755               | -742               |

## Absorption and ECD measurements

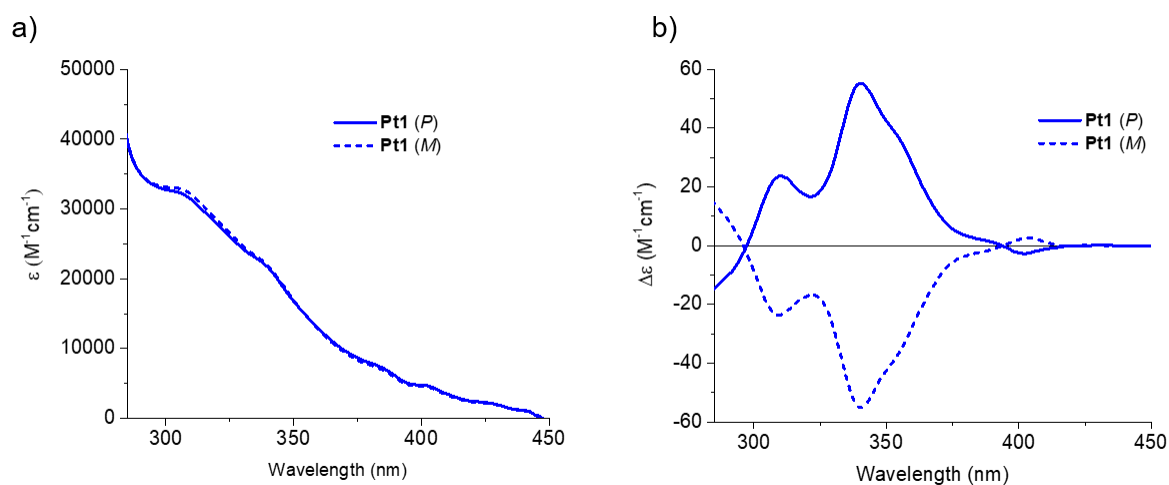

**Figure S1.13:** a) UV-vis and b) ECD spectra of **Pt1** enantiomers in toluene at room temperature ( $C = 2 \times 10^{-5} M$ ).

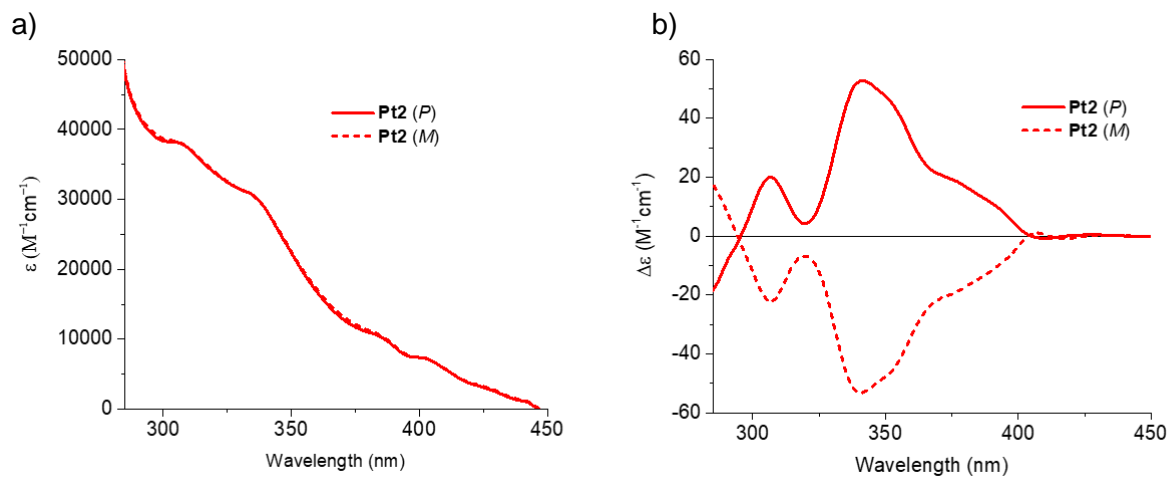

**Figure S1.14:** a) UV-vis and b) ECD spectra of **Pt2** enantiomers in toluene at room temperature ( $C = 2 \times 10^{-5} M$ ).

## Luminescence

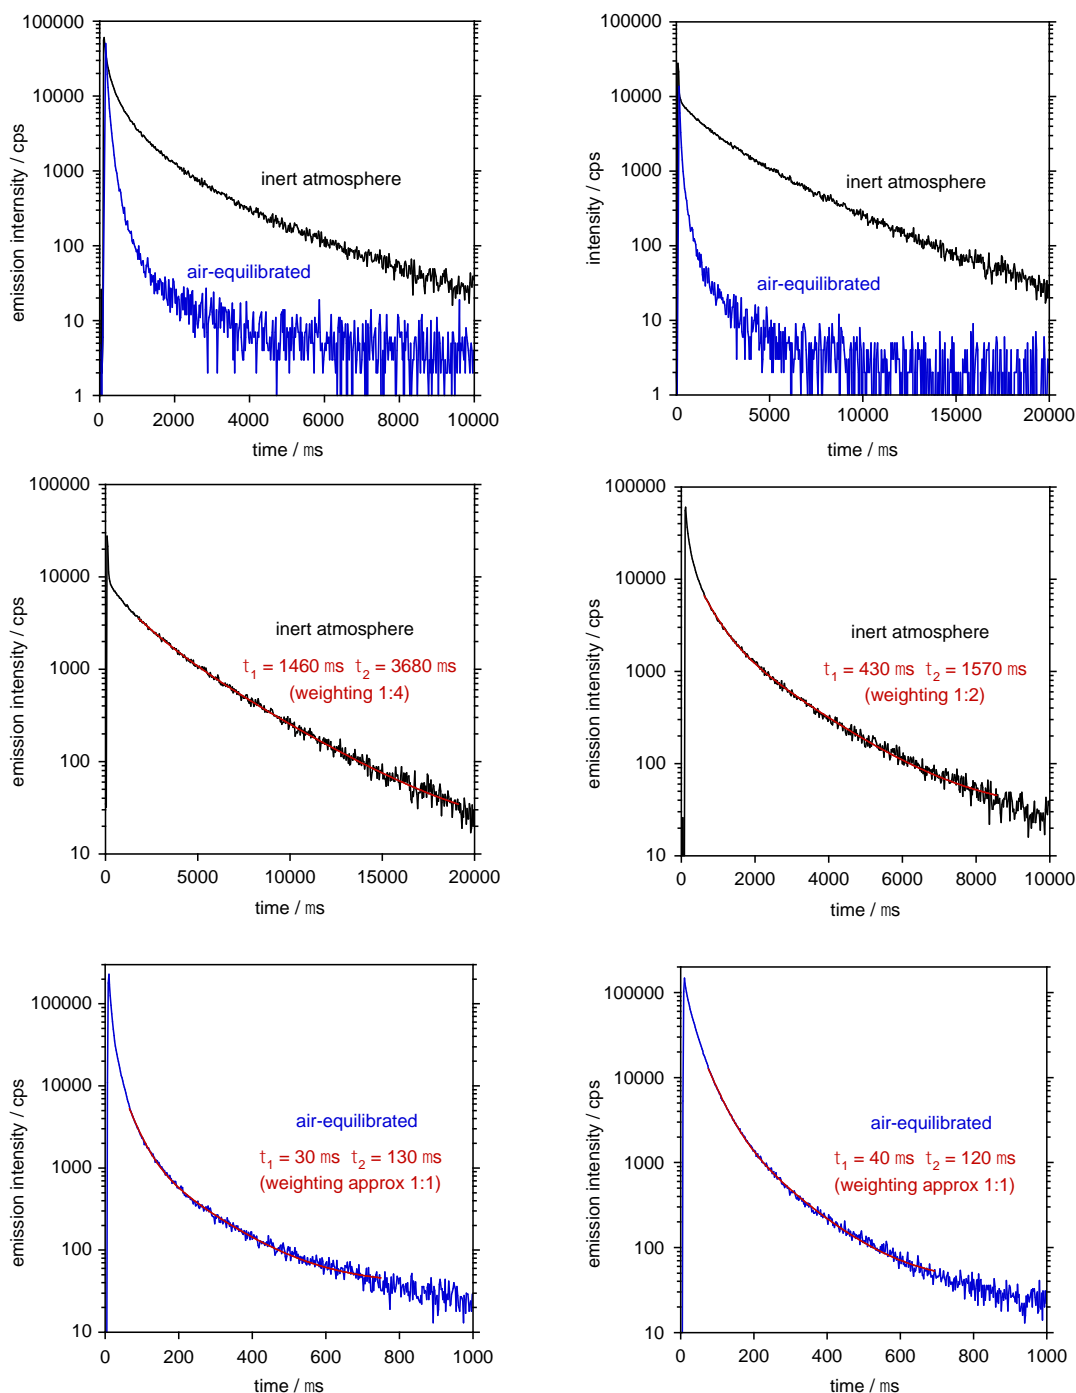

**Figure S1.15:** Luminescence decay kinetics of Pt1 (left) and Pt2 (right) at 2 wt% in PMMA at 295 K. **Top:** Decays under inert atmosphere (black) and the corresponding traces under air-equilibrated conditions (blue) shown on the same timescale for comparison. **Middle:** The decays under inert atmosphere (black), fitted to a sum of two exponentials as shown in red. **Bottom:** The decays under air-equilibrated conditions (blue), fitted to a sum of two exponentials as shown in red.

## CPL measurements

The parameters were: excitation wavelength = 365 nm, emission bandwidth  $\sim$  10 nm, integration time = 4 sec, scan-speed = 50 nm/min, accumulations = 3.

The reported spectra are normalized on the maximum of their corresponding photoluminescence spectra, so that the  $g_{lum}$  values can be directly read on the y-axis at the maximum of each curve.

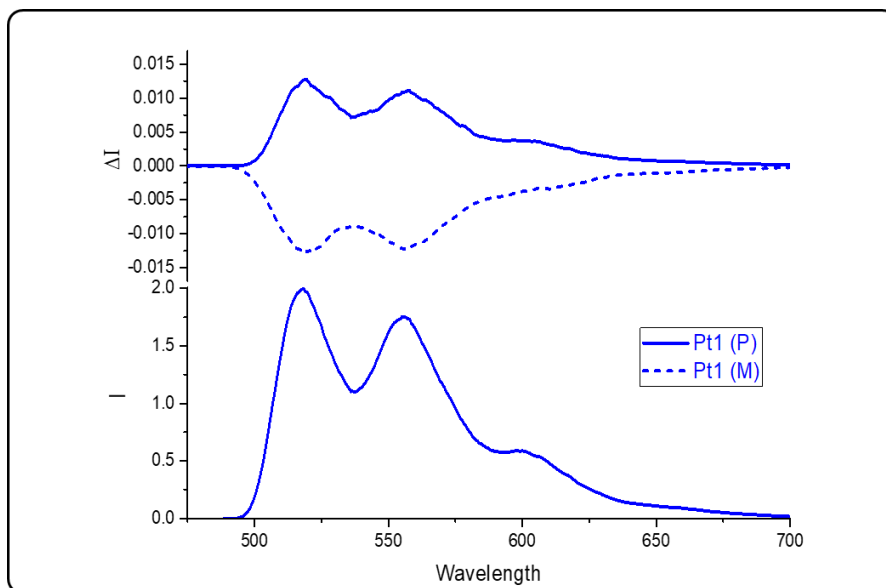

**Figure S1.16:** CPL spectra of enantiomeric pair of (P)- and (M)-Pt1 measured in 2-methyl-THF at 77 K ( $\lambda_{ex}$ = 365 nm) (top) along with the corresponding photoluminescence spectra (bottom).

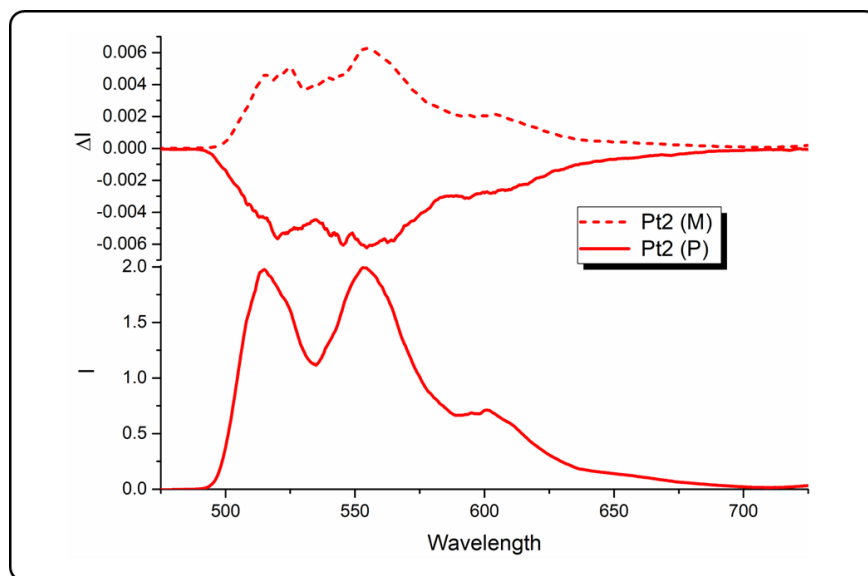

**Figure S1.17:** CPL spectra of enantiomeric pair of (P)- and (M)-Pt2 measured in 2-methyl-THF at 77 K ( $\lambda_{ex}$ = 365 nm) (top) along with the corresponding photoluminescence spectra (bottom).

## S2. Computational section

### S2.1. Computational details

The computational protocol employed in the presented study follows that used in References [2a,3] to successfully characterize Ir(III)- and Re(I)-based complexes comprising NHC-[5]helicene ligands. All the calculations were performed with the Gaussian 16 (G16) program,<sup>4</sup> utilizing SV(P)<sup>5</sup> basis set for lighter atoms (H, C, N, O) and the SDD (Stuttgart/Dresden RSC 1997) basis and the matching 60-electron scalar relativistic effective core potential for the metal (Pt).<sup>6,7</sup> Solvent effects were considered by means of the polarizable continuum model (PCM)<sup>8,9,10,11,12</sup> for toluene ( $\epsilon = 2.3741$ ) and tetrahydrofuran (THF,  $\epsilon = 7.4257$ ); note that THF was used to approximate 2-methyl-tetrahydrofuran solvent that was experimentally employed in low-temperature emission measurements but parameters of which are not implemented in G16. No symmetry was explicitly imposed in the computations.

Geometry optimizations of the studied Pt(II) complexes **Pt1** and **Pt2** were performed employing density functional theory (DFT) approach with the B3LYP exchange-correlation functional.<sup>13,14,15</sup> For **Pt2**, different rotameric structures for phenyl groups in dibenzoylmethane moiety were considered (see Figure S2.1).

Optical rotation (OR) parameters, absorption and electronic circular dichroism (ECD) spectra were modelled via time-dependent DFT (TDDFT) linear response calculations. The sodium-D line ( $\lambda = 589.3$  nm) ORs were computed with the BHLYP<sup>15,16</sup> and PBE0<sup>17,18</sup> functionals, the former demonstrating a better agreement with the experimental data (Table S2.1). Absorption UV-vis and ECD spectra were simulated based on calculations of the lowest 120 vertical singlet electronic excitations, followed by Gaussian broadening of the intensities using the GaussView 5.0.9 program.<sup>19</sup> The Gaussian broadening parameter was chosen to be  $\sigma = 0.20$  eV for all the spectra. This subset of computations employed the PBE0 functional, and some benchmark calculations were also performed with CAM-B3LYP<sup>20</sup> which however did not show any improved agreement with experiments (Figure S2.2). Accordingly, the assignments of the spectra were thus based on an analysis of the PBE0 results.

Electronic emission (phosphorescence) spectra via  $T_1$  excited-states geometry optimizations were modelled using the TDDFT-PBE0 approach with the Tamm-Dancoff approximation (TDA).<sup>21,22,23,24,25,26</sup> Some benchmark calculations were also performed not employing the TDA but in most cases they were found to underestimate the  $T_1$  energies significantly, in line with the previous observation for some helicene-based metal complexes.<sup>27,28,29,30</sup> Importantly, however, both corresponding sets of computations (with and without the TDA) show overall the same electronic assignment of the  $T_1$ - $S_0$  emission transitions. For the optimized  $T_1$  excited-state structures of **Pt2**, frequencies calculations were performed at the corresponding level of theory in order to confirm that they all represent energy minima (no imaginary frequencies) on  $T_1$  excited-state potential energy surface.

## S2.2. Additional calculated data

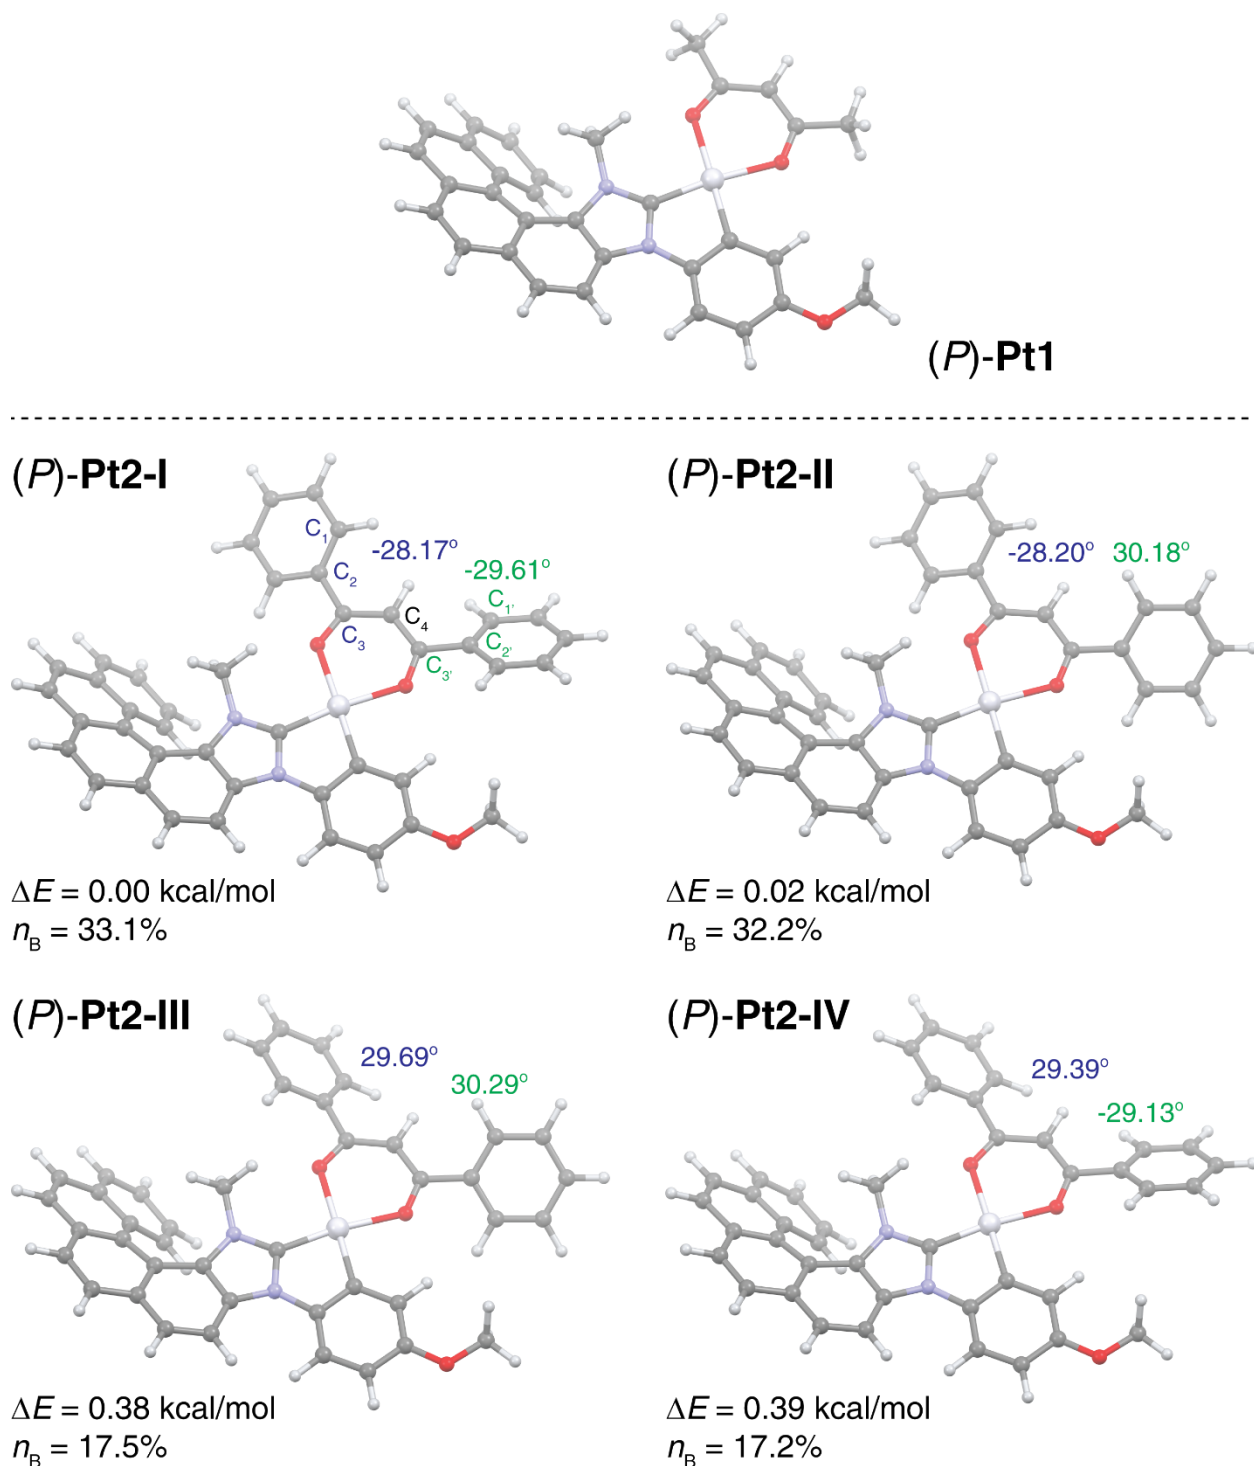

**Figure S2.1:** Optimized (DFT-B3LYP//SDD/SV(P) with continuum solvent model for toluene) structures of helicene-NHC-Pt complexes **Pt1** and **Pt2**. Values listed for **Pt2** are dihedral angles (as defined on the structure **Pt2-I**), relative energies  $\Delta E$  and the corresponding Boltzmann populations (at 25 °C)  $n_B$ . Note that (P)-**Pt2-IV** structure corresponds to that found in the X-ray crystal structure of the compound.



**Table S2.1:** Experimental and calculated specific optical rotations  $[\alpha]_D$  (in  $10^{-1} \text{ deg}\cdot\text{cm}^2\cdot\text{g}^{-1}$ ) of helicene-NHC-Pt complexes (*P*)-Pt1 and (*P*)-Pt2.

| Method                           | ( <i>P</i> )-Pt1           | ( <i>P</i> )-Pt2 <sup>a</sup> |       |                            |       |        |
|----------------------------------|----------------------------|-------------------------------|-------|----------------------------|-------|--------|
|                                  |                            | I                             | II    | III                        | IV    | averd. |
| BHLYP//SDD/SV(P)<br>PCM(toluene) | 940.2                      | 606.6                         | 918.1 | 1153                       | 846.7 | 843.8  |
| PBE0//SDD/SV(P)<br>PCM(toluene)  | 1296                       | 920.7                         | 1306  | 1601                       | 1219  | 1215   |
| Expt. (25 °C)                    | 952<br>(-947) <sup>b</sup> |                               |       | 755<br>(-742) <sup>b</sup> |       |        |

<sup>a</sup> Numbers listed (I, II, III, IV) correspond to different Pt2 conformers (see Figure S2.1), ‘averd.’ indicates Boltzmann-averaged value at 25 °C. <sup>b</sup> Value for (*M*) enantiomer.

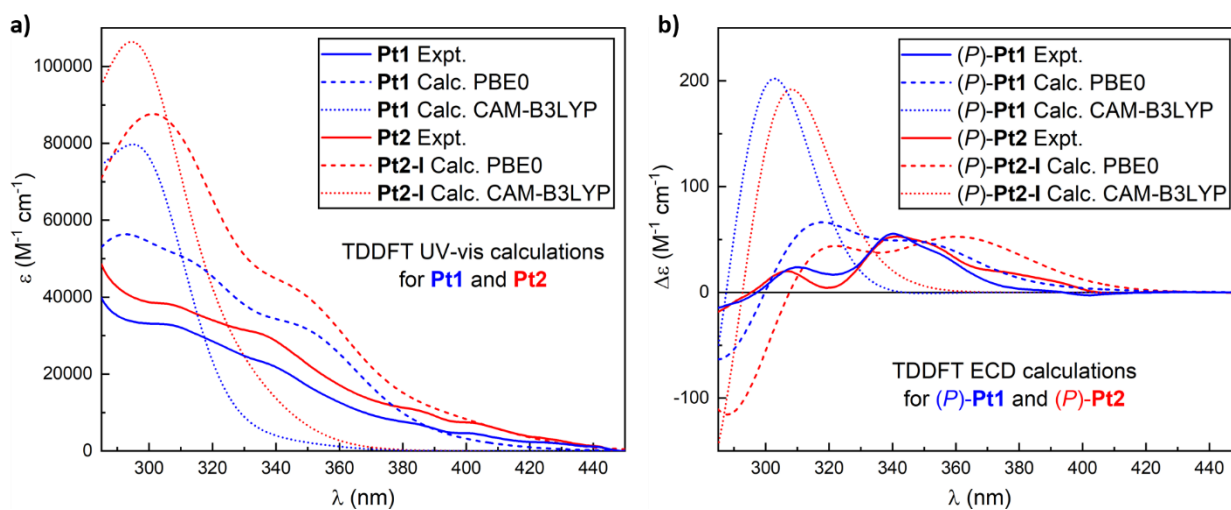

**Figure S2.2:** Experimental and simulated (TDDFT-PBE0//SDD/SV(P) and TDDFT-CAM-B3LYP//SDD/SV(P) with continuum solvent model for toluene) UV-vis (panel a) and ECD (panel b) spectra for helicene-NHC-Pt complexes Pt1 and Pt2 (conformer I, see Figure S2.1 for structure visualization).

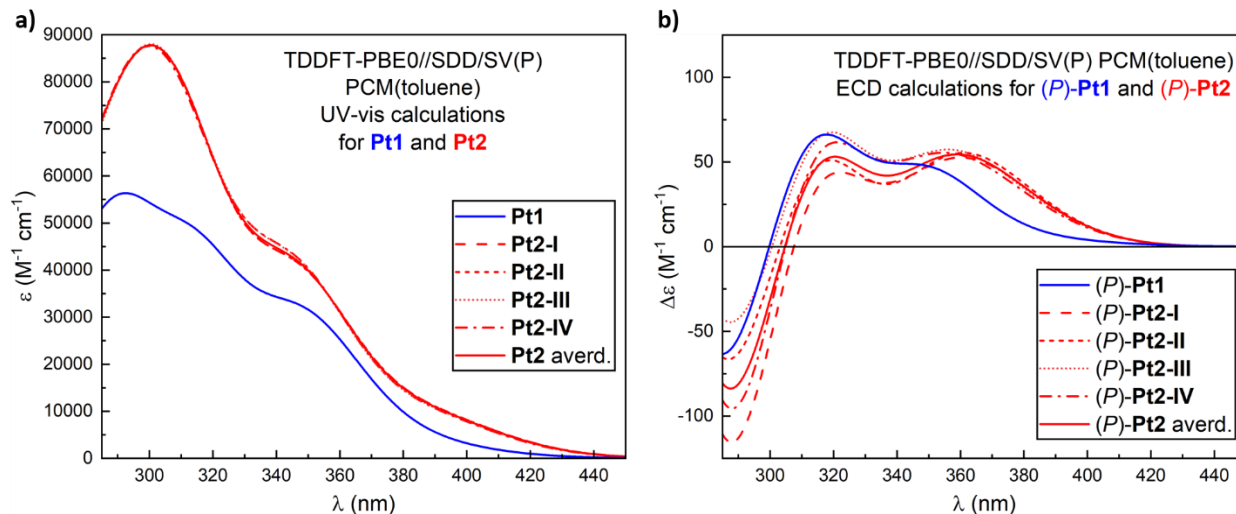

**Figure S2.3:** Simulated (TDDFT-PBE0//SDD/SV(P) with continuum solvent model for toluene) UV-vis (panel a) and ECD (panel b) spectra for helicene-NHC-Pt complexes **Pt1** and **Pt2** (conformers I-IV, see Figure S2.1 for structures visualization; 'averd.' corresponds to Boltzmann-averaged (25 °C) spectrum).

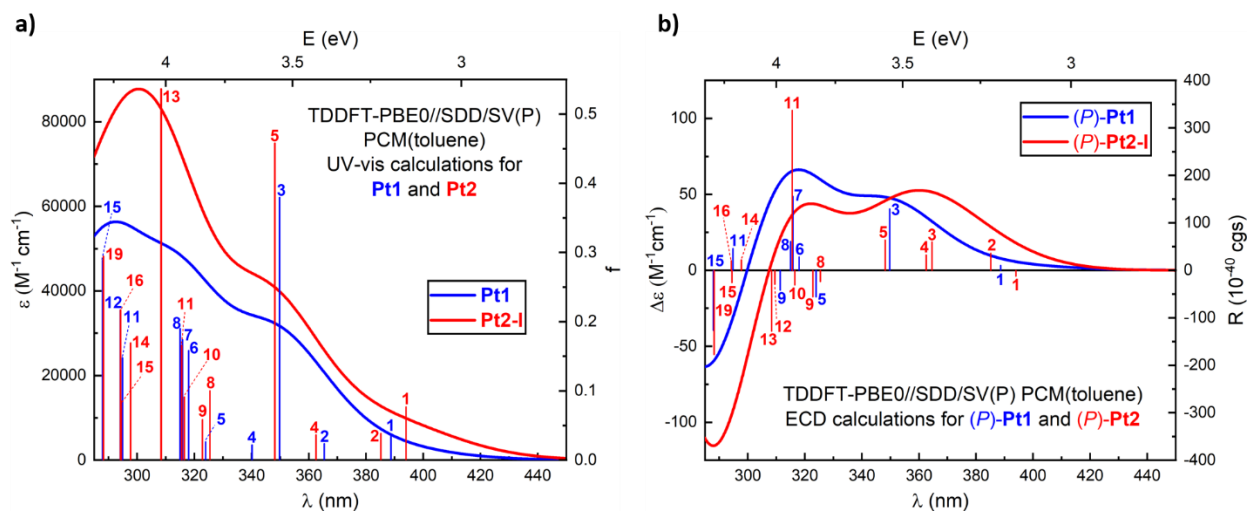

**Figure S2.4:** Simulated (TDDFT-PBE0//SDD/SV(P) with continuum solvent model for toluene) UV-vis (panel a) and ECD (panel b) spectra for helicene-NHC-Pt complexes **Pt1** and **Pt2** (conformer I, see Figure S2.1 for structure visualization). No spectral shift has been applied. Selected calculated excitation energies along with the corresponding oscillator and rotatory strengths, analyzed in detail (see Tables S2.2 and S2.3 and Figures S2.6 and S2.7), indicated as 'stick' spectra.

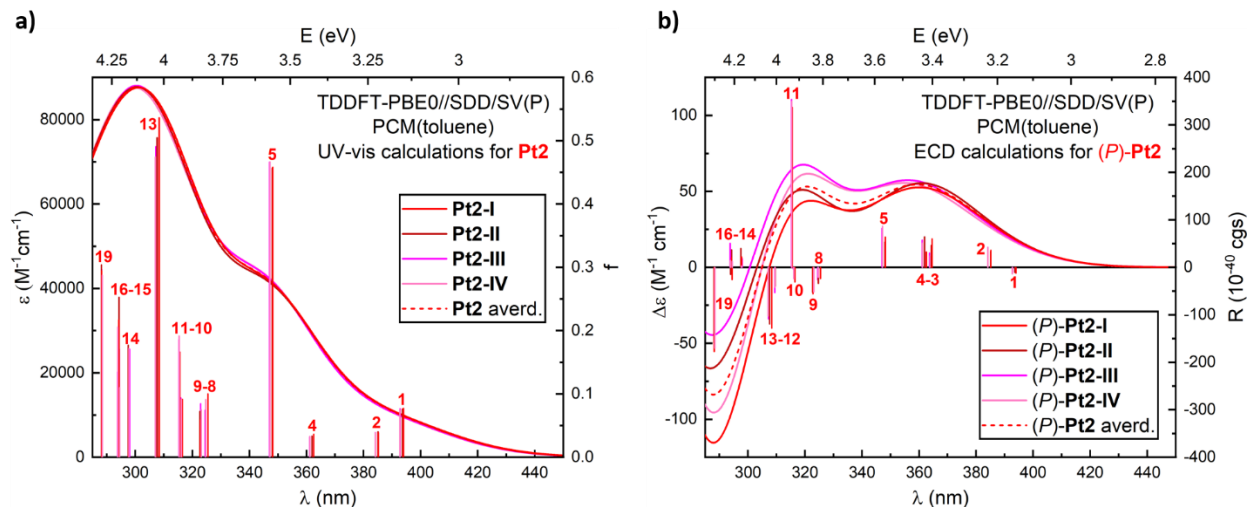

**Figure S2.5:** Simulated (TDDFT-PBE0//SDD/SV(P) with continuum solvent model for toluene) UV-vis (panel a) and ECD (panel b) spectra for different conformers (I-IV, see Figure S2.1 for structures visualization) of helicene-NHC-Pt complex **Pt2**. ‘averd.’ corresponds to Boltzmann-averaged (25 °C) spectrum. No spectral shift has been applied. Selected calculated excitation energies along with the corresponding oscillator and rotatory strengths, analyzed in detail (see Tables S2.3-S2.6 and Figure S2.7), indicated as ‘stick’ spectra.

**Table S2.2:** Selected dominant excitations and occupied (occ) – unoccupied (unocc) MO-pair contributions (greater than 10%) for helicene-NHC-Pt complex **Pt1**. For MOs visualization, see Figure S2.6. Based on TDDFT-PBE0//SDD/SV(P) with continuum solvent model for toluene calculations.

| Excitation | $E / \text{eV}$ | $\lambda / \text{nm}$ | $f$   | $R / 10^{-40} \text{ cgs}$ | occ no. | unocc no. | %    | Assignment                                                         |
|------------|-----------------|-----------------------|-------|----------------------------|---------|-----------|------|--------------------------------------------------------------------|
| 1          | 3.190           | 389                   | 0.035 | 10.44                      | 137     | 138       | 86.4 | anisole-NHC-Pt→NHC-helicene (IL- & ML-CT)                          |
| 2          | 3.393           | 365                   | 0.024 | -5.10                      | 137     | 139       | 64.8 | anisole-NHC-Pt→NHC-helicene (IL- & ML-CT)                          |
|            |                 |                       |       |                            | 136     | 138       | 23.2 | NHC-helicene-Pt-acac→NHC-helicene ( $\pi$ - $\pi^*$ & LL- & ML-CT) |
| 3          | 3.545           | 350                   | 0.379 | 129.38                     | 136     | 138       | 39.7 | NHC-helicene-Pt-acac→NHC-helicene ( $\pi$ - $\pi^*$ & LL- & ML-CT) |
|            |                 |                       |       |                            | 136     | 139       | 21.2 | NHC-helicene-Pt-acac→NHC-helicene ( $\pi$ - $\pi^*$ & LL- & ML-CT) |

|   |       |     |       |        |     |     |      |                                                                                            |
|---|-------|-----|-------|--------|-----|-----|------|--------------------------------------------------------------------------------------------|
|   |       |     |       |        | 137 | 139 | 17.5 | anisole-NHC-Pt→NHC-helicene<br>(IL- & ML-CT)                                               |
| 4 | 3.645 | 340 | 0.022 | -1.45  | 136 | 139 | 32.6 | NHC-helicene-Pt-acac→NHC-helicene<br>( $\pi$ - $\pi^*$ & LL- & ML-CT)                      |
|   |       |     |       |        | 136 | 138 | 22.7 | NHC-helicene-Pt-acac→NHC-helicene<br>( $\pi$ - $\pi^*$ & LL- & ML-CT)                      |
|   |       |     |       |        | 135 | 138 | 15.1 | anisole-NHC-helicene-Pt-acac→NHC-helicene<br>( $\pi$ - $\pi^*$ & IL- & LL- & ML-CT)        |
| 5 | 3.827 | 324 | 0.026 | -55.70 | 137 | 141 | 44.8 | anisole-NHC-Pt→anisole-NHC-helicene-Pt-acac<br>( $\pi$ - $\pi^*$ & MM & IL- & LL- & ML-CT) |
|   |       |     |       |        | 137 | 140 | 15.3 | anisole-NHC-Pt→acac<br>(LL- / ML-CT)                                                       |
|   |       |     |       |        | 136 | 139 | 10.0 | NHC-helicene-Pt-acac→NHC-helicene<br>( $\pi$ - $\pi^*$ & LL- & ML-CT)                      |
| 6 | 3.899 | 318 | 0.158 | 28.54  | 135 | 138 | 54.8 | anisole-NHC-helicene-Pt-acac→NHC-helicene<br>( $\pi$ - $\pi^*$ & IL- & LL- & ML-CT)        |
|   |       |     |       |        | 137 | 141 | 16.6 | anisole-NHC-Pt→anisole-NHC-helicene-Pt-acac<br>( $\pi$ - $\pi^*$ & MM & IL- & LL- & ML-CT) |
| 7 | 3.926 | 316 | 0.174 | 156.04 | 135 | 139 | 19.3 | anisole-NHC-helicene-Pt-acac→NHC-helicene<br>( $\pi$ - $\pi^*$ & IL- & LL- & ML-CT)        |
|   |       |     |       |        | 133 | 138 | 18.7 | helicene-anisole-Pt→NHC-helicene<br>( $\pi$ - $\pi^*$ & IL- & ML-CT)                       |
|   |       |     |       |        | 137 | 140 | 17.7 | anisole-NHC-Pt→acac<br>(LL- / ML-CT)                                                       |
|   |       |     |       |        | 136 | 139 | 15.4 | NHC-helicene-Pt-acac→NHC-helicene<br>( $\pi$ - $\pi^*$ & LL- & ML-CT)                      |
| 8 | 3.936 | 315 | 0.190 | 61.10  | 137 | 140 | 49.9 | anisole-NHC-Pt→acac<br>(LL- / ML-CT)                                                       |

|    |       |     |       |         |     |     |      |                                                                                           |
|----|-------|-----|-------|---------|-----|-----|------|-------------------------------------------------------------------------------------------|
|    |       |     |       |         | 135 | 138 | 17.2 | aniso-<br>acac→NHC-helicene<br>( $\pi$ - $\pi^*$ & IL- & LL- & ML-CT)                     |
| 9  | 3.983 | 311 | 0.016 | -41.84  | 134 | 138 | 39.1 | Pt( $d_{22}$ )→NHC-helicene<br>(ML-CT)                                                    |
|    |       |     |       |         | 134 | 139 | 22.7 | Pt( $d_{22}$ )→NHC-helicene<br>(ML-CT)                                                    |
|    |       |     |       |         | 134 | 141 | 16.3 | Pt( $d_{22}$ )→aniso-<br>helicene-Pt-acac<br>(MM & ML-CT)                                 |
| 11 | 4.205 | 295 | 0.148 | 46.03   | 133 | 138 | 38.3 | helicene-aniso-<br>Pt→NHC-<br>helicene<br>( $\pi$ - $\pi^*$ & IL- & ML-CT)                |
|    |       |     |       |         | 135 | 139 | 30.9 | aniso-<br>acac→NHC-helicene<br>( $\pi$ - $\pi^*$ & IL- & LL- & ML-CT)                     |
| 12 | 4.216 | 294 | 0.217 | -0.42   | 133 | 139 | 25.7 | helicene-aniso-<br>Pt→NHC-<br>helicene<br>( $\pi$ - $\pi^*$ & IL- & ML-CT)                |
|    |       |     |       |         | 132 | 138 | 19.2 | aniso-<br>acac→NHC-<br>helicene<br>(IL- / LL- / ML-CT)                                    |
|    |       |     |       |         | 135 | 139 | 17.0 | aniso-<br>acac→NHC-helicene<br>( $\pi$ - $\pi^*$ & IL- & LL- & ML-CT)                     |
| 15 | 4.306 | 288 | 0.288 | -126.52 | 136 | 141 | 53.7 | NHC-helicene-Pt-<br>acac→aniso-<br>Pt-acac<br>( $\pi$ - $\pi^*$ & MM & IL- & LL- & ML-CT) |
|    |       |     |       |         | 136 | 140 | 13.8 | NHC-helicene-Pt-acac→acac<br>( $\pi$ - $\pi^*$ & LL- & ML-CT)                             |
|    |       |     |       |         | 133 | 138 | 10.5 | helicene-aniso-<br>Pt→NHC-<br>helicene<br>( $\pi$ - $\pi^*$ & IL- & ML-CT)                |

---

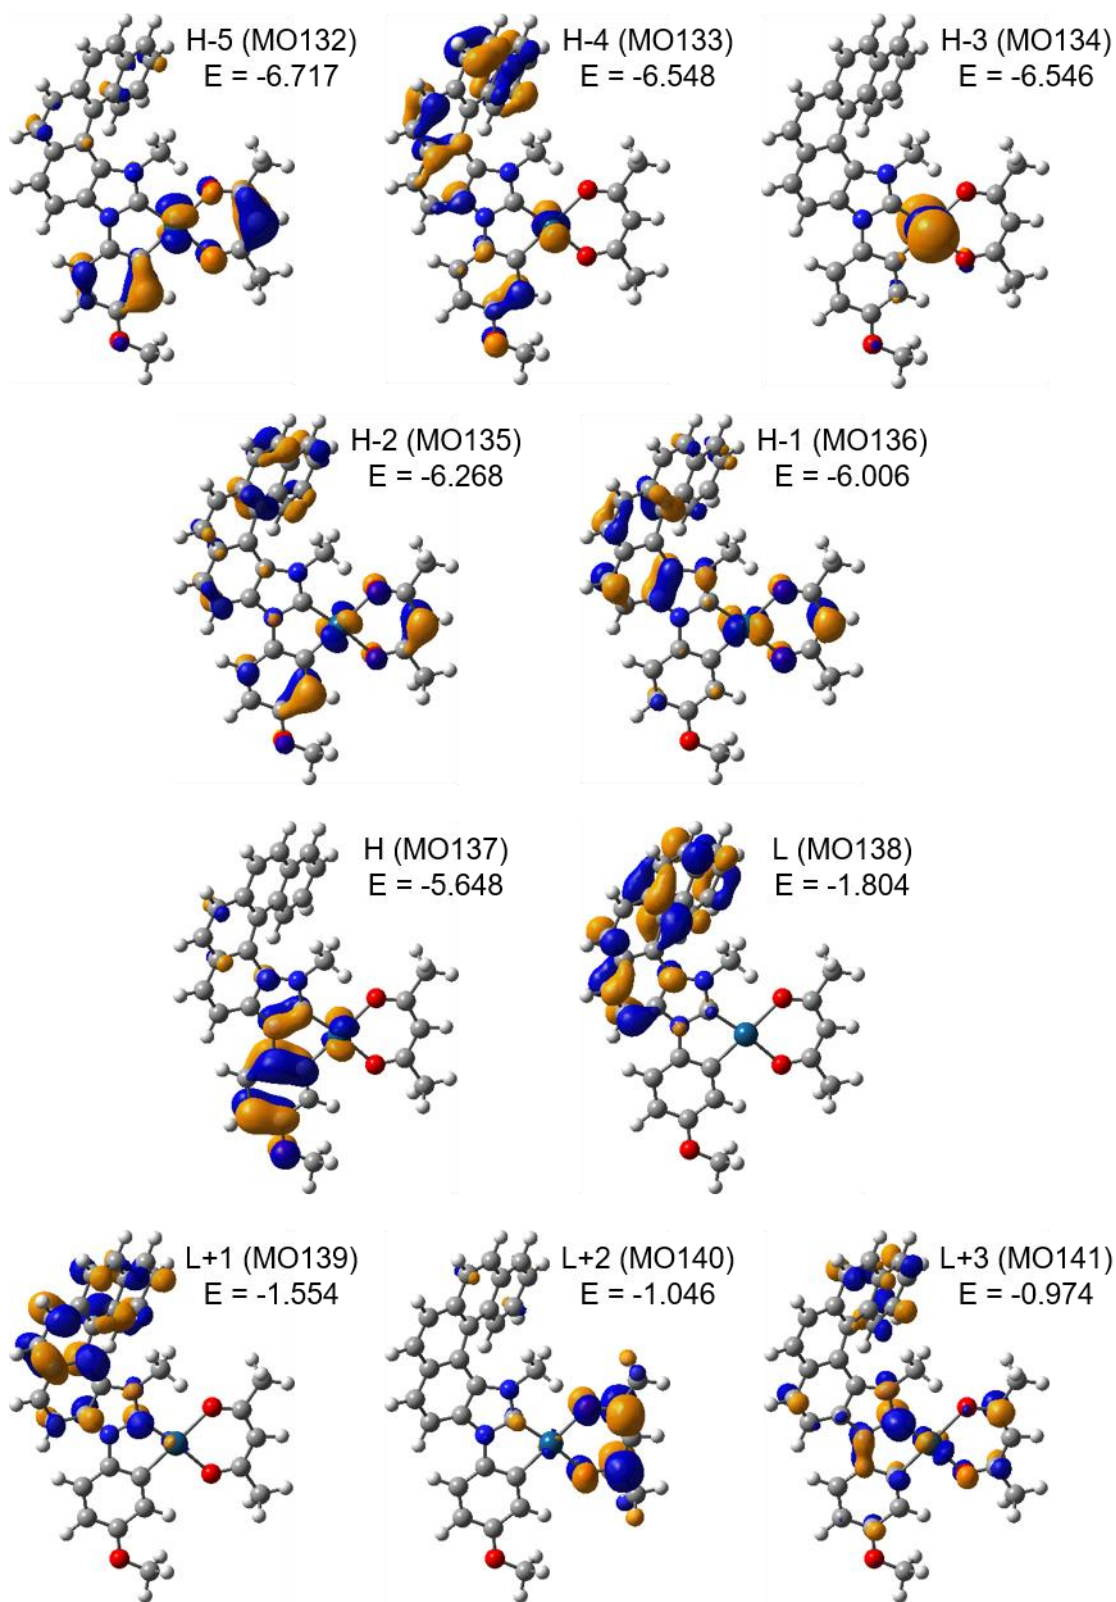

**Figure S2.6:** Isosurfaces ( $\pm 0.04$  au) of MOs involved in selected electronic transitions of **Pt1**. Based on PBE0//SDD/SV(P) with continuum solvent model for toluene calculations. H = HOMO, L = LUMO. Values  $E$  listed are orbital energies, in eV.

**Table S2.3:** Selected dominant excitations and occupied (occ) – unoccupied (unocc) MO-pair contributions (greater than 10%) for helicene-NHC-Pt complex **Pt2-I**. For MOs visualization, see Figure S2.7. Based on TDDFT-PBE0//SDD/SV(P) with continuum solvent model for toluene calculations.

| Excitation | $E$ / eV | $\lambda$ / nm | $f$   | $R$ / $10^{-40}$ cgs | occ no. | unocc no. | %    | Assignment                                                                                 |
|------------|----------|----------------|-------|----------------------|---------|-----------|------|--------------------------------------------------------------------------------------------|
| 1          | 3.147    | 394            | 0.077 | -12.19               | 169     | 170       | 88.0 | anisole-NHC-Pt→dbm<br>(LL- & ML-CT)                                                        |
| 2          | 3.219    | 385            | 0.039 | 36.17                | 169     | 171       | 80.7 | anisole-NHC-Pt→NHC-helicene<br>(IL- & ML-CT)                                               |
| 3          | 3.401    | 365            | 0.003 | 60.03                | 169     | 172       | 46.0 | anisole-NHC-Pt→NHC-helicene<br>(IL- & ML-CT)                                               |
|            |          |                |       |                      | 168     | 171       | 19.3 | NHC-helicene-Pt-dbm <sub>core</sub> →NHC-helicene<br>( $\pi$ - $\pi^*$ & LL- & ML-CT)      |
|            |          |                |       |                      | 168     | 170       | 18.2 | NHC-helicene-Pt-dbm <sub>core</sub> →dbm<br>( $\pi$ - $\pi^*$ & IL- & LL- & ML-CT)         |
| 4          | 3.420    | 362            | 0.037 | 32.43                | 168     | 170       | 65.2 | NHC-helicene-Pt-dbm <sub>core</sub> →dbm<br>( $\pi$ - $\pi^*$ & IL- & LL- & ML-CT)         |
|            |          |                |       |                      | 169     | 172       | 15.6 | anisole-NHC-Pt→NHC-helicene<br>(IL- & ML-CT)                                               |
| 5          | 3.562    | 348            | 0.458 | 63.74                | 168     | 171       | 30.0 | NHC-helicene-Pt-dbm <sub>core</sub> →NHC-helicene<br>( $\pi$ - $\pi^*$ & LL- & ML-CT)      |
|            |          |                |       |                      | 168     | 172       | 23.5 | NHC-helicene-Pt-dbm <sub>core</sub> →NHC-helicene<br>( $\pi$ - $\pi^*$ & LL- & ML-CT)      |
|            |          |                |       |                      | 169     | 172       | 19.7 | anisole-NHC-Pt→NHC-helicene<br>(IL- & ML-CT)                                               |
| 8          | 3.810    | 325            | 0.100 | -23.74               | 167     | 170       | 75.4 | anisole-NHC-helicene-Pt-dbm <sub>core</sub> →dbm<br>( $\pi$ - $\pi^*$ & IL- & LL- & ML-CT) |
| 9          | 3.841    | 323            | 0.059 | -55.73               | 169     | 173       | 58.7 | anisole-NHC-Pt→anisole-NHC-helicene-Pt<br>( $\pi$ - $\pi^*$ & MM & IL- & ML-CT)            |
| 10         | 3.918    | 316            | 0.091 | -31.10               | 167     | 171       | 49.2 | anisole-NHC-helicene-Pt-dbm <sub>core</sub> →NHC-helicene                                  |

|    |       |     |       |         |     |     |      |                                                                                                                 |
|----|-------|-----|-------|---------|-----|-----|------|-----------------------------------------------------------------------------------------------------------------|
|    |       |     |       |         |     |     |      | ( $\pi$ - $\pi^*$ & IL- & LL- & ML-CT)                                                                          |
|    |       |     |       |         | 167 | 172 | 15.8 | anisole-NHC-helicene-Pt-<br>dbm <sub>core</sub> →NHC-helicene<br>( $\pi$ - $\pi^*$ & IL- & LL- & ML-CT)         |
| 11 | 3.929 | 316 | 0.166 | 337.07  | 168 | 172 | 22.7 | NHC-helicene-Pt-<br>dbm <sub>core</sub> →NHC-helicene<br>( $\pi$ - $\pi^*$ & LL- & ML-CT)                       |
|    |       |     |       |         | 167 | 171 | 20.3 | anisole-NHC-helicene-Pt-<br>dbm <sub>core</sub> →NHC-helicene<br>( $\pi$ - $\pi^*$ & IL- & LL- & ML-CT)         |
|    |       |     |       |         | 166 | 171 | 16.8 | helicene-anisole-Pt→NHC-<br>helicene<br>( $\pi$ - $\pi^*$ & IL- & ML-CT)                                        |
| 12 | 4.006 | 309 | 0.012 | -29.60  | 165 | 171 | 39.9 | Pt(d <sub>z2</sub> )→NHC-helicene<br>(ML-CT)                                                                    |
|    |       |     |       |         | 165 | 172 | 27.8 | Pt(d <sub>z2</sub> )→NHC-helicene<br>(ML-CT)                                                                    |
|    |       |     |       |         | 165 | 173 | 22.7 | Pt(d <sub>z2</sub> )→anisole-NHC-<br>helicene-Pt<br>(MM & ML-CT)                                                |
| 13 | 4.021 | 308 | 0.536 | -128.08 | 164 | 170 | 76.2 | anisole-Pt-dbm→dbm<br>( $\pi$ - $\pi^*$ & IL- & LL- & ML-CT)                                                    |
| 14 | 4.165 | 298 | 0.169 | 21.92   | 166 | 170 | 69.2 | helicene-anisole-Pt→dbm<br>(LL- & ML-CT)                                                                        |
| 15 | 4.211 | 294 | 0.085 | -25.96  | 162 | 170 | 39.4 | Pt-dbm→dbm<br>( $\pi$ - $\pi^*$ & IL- & ML-CT)                                                                  |
| 16 | 4.215 | 294 | 0.217 | 20.16   | 167 | 172 | 39.5 | anisole-NHC-helicene-Pt-<br>dbm <sub>core</sub> →NHC-helicene<br>( $\pi$ - $\pi^*$ & IL- & LL- & ML-CT)         |
|    |       |     |       |         | 166 | 171 | 16.7 | helicene-anisole-Pt→NHC-<br>helicene<br>( $\pi$ - $\pi^*$ & IL- & ML-CT)                                        |
|    |       |     |       |         | 162 | 170 | 12.4 | Pt-dbm→dbm<br>( $\pi$ - $\pi^*$ & IL- & ML-CT)                                                                  |
| 19 | 4.302 | 288 | 0.295 | -177.78 | 168 | 173 | 60.1 | NHC-helicene-Pt-dbm <sub>core</sub> →<br>anisole-NHC-helicene-Pt<br>( $\pi$ - $\pi^*$ & MM & IL- & LL- & ML-CT) |
|    |       |     |       |         | 166 | 171 | 16.2 | helicene-anisole-Pt→NHC-<br>helicene<br>( $\pi$ - $\pi^*$ & IL- & ML-CT)                                        |



**Table S2.4:** Selected dominant excitations and occupied (occ) – unoccupied (unocc) MO-pair contributions (greater than 10%) for helicene-NHC-Pt complex **Pt2-II**. For MOs visualization, see Figure S2.7. Based on TDDFT-PBE0//SDD/SV(P) with continuum solvent model for toluene calculations.

| Excitation | $E / \text{eV}$ | $\lambda / \text{nm}$ | $f$   | $R / 10^{-40} \text{ cgs}$ | occ no. | unocc no. | %    | Assignment                                                                                        |
|------------|-----------------|-----------------------|-------|----------------------------|---------|-----------|------|---------------------------------------------------------------------------------------------------|
| 1          | 3.150           | 394                   | 0.076 | -11.02                     | 169     | 170       | 86.9 | aniso-NHC-Pt→dbm<br>(LL- & ML-CT)                                                                 |
| 2          | 3.220           | 385                   | 0.040 | 33.74                      | 169     | 171       | 80.2 | aniso-NHC-Pt→NHC-helicene<br>(IL- & ML-CT)                                                        |
| 3          | 3.403           | 364                   | 0.005 | 46.52                      | 169     | 172       | 52.4 | aniso-NHC-Pt→NHC-helicene<br>(IL- & ML-CT)                                                        |
|            |                 |                       |       |                            | 168     | 171       | 21.7 | NHC-helicene-Pt-dbm <sub>core</sub> →NHC-helicene<br>( $\pi$ - $\pi^*$ & LL- & ML-CT)             |
| 4          | 3.426           | 362                   | 0.033 | 64.34                      | 168     | 170       | 73.3 | NHC-helicene-Pt-dbm <sub>core</sub> →dbm<br>( $\pi$ - $\pi^*$ & IL- & LL- & ML-CT)                |
| 5          | 3.563           | 348                   | 0.457 | 53.23                      | 168     | 171       | 29.9 | NHC-helicene-Pt-dbm <sub>core</sub> →NHC-helicene<br>( $\pi$ - $\pi^*$ & LL- & ML-CT)             |
|            |                 |                       |       |                            | 168     | 172       | 23.5 | NHC-helicene-Pt-dbm <sub>core</sub> →NHC-helicene<br>( $\pi$ - $\pi^*$ & LL- & ML-CT)             |
|            |                 |                       |       |                            | 169     | 172       | 19.7 | aniso-NHC-Pt→NHC-helicene<br>(IL- & ML-CT)                                                        |
| 8          | 3.819           | 325                   | 0.080 | -34.00                     | 167     | 170       | 68.1 | aniso-NHC-helicene-Pt-dbm <sub>core</sub> →dbm<br>( $\pi$ - $\pi^*$ & IL- & LL- & ML-CT)          |
| 9          | 3.843           | 323                   | 0.073 | -52.41                     | 169     | 173       | 55.0 | aniso-NHC-Pt→aniso-NHC-helicene-Pt<br>( $\pi$ - $\pi^*$ & MM & IL- & ML-CT)                       |
| 10         | 3.920           | 316                   | 0.091 | -2.08                      | 167     | 171       | 49.9 | aniso-NHC-helicene-Pt-dbm <sub>core</sub> →NHC-helicene<br>( $\pi$ - $\pi^*$ & IL- & LL- & ML-CT) |
|            |                 |                       |       |                            | 167     | 172       | 15.8 | aniso-NHC-helicene-Pt-dbm <sub>core</sub> →NHC-helicene<br>( $\pi$ - $\pi^*$ & IL- & LL- & ML-CT) |
| 11         | 3.932           | 315                   | 0.186 | 325.10                     | 168     | 172       | 24.0 | NHC-helicene-Pt-dbm <sub>core</sub> →NHC-helicene                                                 |

|    |       |     |       |         |     |     |      |                                                                                                                 |
|----|-------|-----|-------|---------|-----|-----|------|-----------------------------------------------------------------------------------------------------------------|
|    |       |     |       |         |     |     |      | ( $\pi$ - $\pi^*$ & LL- & ML-CT)                                                                                |
|    |       |     |       |         | 167 | 171 | 20.2 | anisole-NHC-helicene-Pt-<br>dbm <sub>core</sub> →NHC-helicene<br>( $\pi$ - $\pi^*$ & IL- & LL- & ML-CT)         |
|    |       |     |       |         | 166 | 171 | 16.6 | helicene-anisole-Pt→NHC-<br>helicene<br>( $\pi$ - $\pi^*$ & IL- & ML-CT)                                        |
| 12 | 4.005 | 310 | 0.013 | -39.81  | 165 | 171 | 37.7 | Pt(d <sub>z2</sub> )→NHC-helicene<br>(ML-CT)                                                                    |
|    |       |     |       |         | 165 | 172 | 26.0 | Pt(d <sub>z2</sub> )→NHC-helicene<br>(ML-CT)                                                                    |
|    |       |     |       |         | 165 | 173 | 21.8 | Pt(d <sub>z2</sub> )→anisole-NHC-<br>helicene-Pt<br>(MM & ML-CT)                                                |
| 13 | 4.031 | 308 | 0.505 | -119.55 | 164 | 170 | 77.1 | anisole-Pt-dbm→dbm<br>( $\pi$ - $\pi^*$ & IL- & LL- & ML-CT)                                                    |
| 14 | 4.167 | 298 | 0.177 | 39.91   | 166 | 170 | 66.5 | helicene-anisole-Pt→dbm<br>(LL- & ML-CT)                                                                        |
| 15 | 4.213 | 294 | 0.253 | 36.90   | 167 | 172 | 40.8 | anisole-NHC-helicene-Pt-<br>dbm <sub>core</sub> →NHC-helicene<br>( $\pi$ - $\pi^*$ & IL- & LL- & ML-CT)         |
|    |       |     |       |         | 166 | 171 | 16.9 | helicene-anisole-Pt→NHC-<br>helicene<br>( $\pi$ - $\pi^*$ & IL- & ML-CT)                                        |
| 19 | 4.303 | 288 | 0.304 | -159.44 | 168 | 173 | 61.2 | NHC-helicene-Pt-dbm <sub>core</sub> →<br>anisole-NHC-helicene-Pt<br>( $\pi$ - $\pi^*$ & MM & IL- & LL- & ML-CT) |
|    |       |     |       |         | 166 | 171 | 15.9 | helicene-anisole-Pt→NHC-<br>helicene<br>( $\pi$ - $\pi^*$ & IL- & ML-CT)                                        |

---

**Table S2.5:** Selected dominant excitations and occupied (occ) – unoccupied (unocc) MO-pair contributions (greater than 10%) for helicene-NHC-Pt complex **Pt2-III**. For MOs visualization, see Figure S2.7. Based on TDDFT-PBE0//SDD/SV(P) with continuum solvent model for toluene calculations.

| Excitation | $E / \text{eV}$ | $\lambda / \text{nm}$ | $f$   | $R / 10^{-40} \text{ cgs}$ | occ no. | unocc no. | %    | Assignment                                                                                              |
|------------|-----------------|-----------------------|-------|----------------------------|---------|-----------|------|---------------------------------------------------------------------------------------------------------|
| 1          | 3.157           | 393                   | 0.077 | -11.16                     | 169     | 170       | 86.7 | anisole-NHC-Pt→dbm<br>(LL- & ML-CT)                                                                     |
| 2          | 3.228           | 384                   | 0.039 | 38.92                      | 169     | 171       | 79.8 | anisole-NHC-Pt→NHC-<br>helicene<br>(IL- & ML-CT)                                                        |
| 3          | 3.410           | 364                   | 0.005 | 30.28                      | 169     | 172       | 54.3 | anisole-NHC-Pt→NHC-<br>helicene<br>(IL- & ML-CT)                                                        |
|            |                 |                       |       |                            | 168     | 171       | 22.1 | NHC-helicene-Pt-<br>dbm <sub>core</sub> →NHC-helicene<br>( $\pi$ - $\pi^*$ & LL- & ML-CT)               |
| 4          | 3.434           | 361                   | 0.032 | 57.57                      | 168     | 170       | 75.8 | NHC-helicene-Pt-<br>dbm <sub>core</sub> →dbm<br>( $\pi$ - $\pi^*$ & IL- & LL- & ML-CT)                  |
| 5          | 3.573           | 347                   | 0.466 | 82.31                      | 168     | 171       | 29.4 | NHC-helicene-Pt-<br>dbm <sub>core</sub> →NHC-helicene<br>( $\pi$ - $\pi^*$ & LL- & ML-CT)               |
|            |                 |                       |       |                            | 168     | 172       | 23.7 | NHC-helicene-Pt-<br>dbm <sub>core</sub> →NHC-helicene<br>( $\pi$ - $\pi^*$ & LL- & ML-CT)               |
|            |                 |                       |       |                            | 169     | 172       | 19.7 | anisole-NHC-Pt→NHC-<br>helicene<br>(IL- & ML-CT)                                                        |
| 8          | 3.822           | 324                   | 0.075 | -26.60                     | 167     | 170       | 64.9 | anisole-NHC-helicene-Pt-<br>dbm <sub>core</sub> →dbm<br>( $\pi$ - $\pi^*$ & IL- & LL- & ML-CT)          |
| 9          | 3.840           | 323                   | 0.085 | -48.27                     | 169     | 173       | 54.3 | anisole-NHC-Pt→anisole-<br>NHC-helicene-Pt<br>( $\pi$ - $\pi^*$ & MM & IL- & ML-CT)                     |
| 10         | 3.924           | 316                   | 0.094 | -3.70                      | 167     | 171       | 43.4 | anisole-NHC-helicene-Pt-<br>dbm <sub>core</sub> →NHC-helicene<br>( $\pi$ - $\pi^*$ & IL- & LL- & ML-CT) |
|            |                 |                       |       |                            | 167     | 172       | 18.3 | anisole-NHC-helicene-Pt-<br>dbm <sub>core</sub> →NHC-helicene<br>( $\pi$ - $\pi^*$ & IL- & LL- & ML-CT) |
|            |                 |                       |       |                            | 166     | 171       | 10.5 | helicene-anisole-Pt→NHC-<br>helicene<br>( $\pi$ - $\pi^*$ & IL- & ML-CT)                                |
| 11         | 3.933           | 315                   | 0.186 | 353.31                     | 168     | 172       | 24.6 | NHC-helicene-Pt-<br>dbm <sub>core</sub> →NHC-helicene                                                   |

|    |       |     |       |         |     |     |      |                                                                                                                 |
|----|-------|-----|-------|---------|-----|-----|------|-----------------------------------------------------------------------------------------------------------------|
|    |       |     |       |         |     |     |      | ( $\pi$ - $\pi^*$ & LL- & ML-CT)<br>anisole-NHC-helicene-Pt-<br>dbm <sub>core</sub> →NHC-helicene               |
|    |       |     |       |         | 167 | 171 | 26.2 | ( $\pi$ - $\pi^*$ & IL- & LL- & ML-CT)                                                                          |
|    |       |     |       |         | 166 | 171 | 13.7 | helicene-anisole-Pt→NHC-<br>helicene                                                                            |
|    |       |     |       |         |     |     |      | ( $\pi$ - $\pi^*$ & IL- & ML-CT)                                                                                |
| 12 | 4.007 | 309 | 0.013 | -53.43  | 165 | 171 | 35.9 | Pt( $d_{z^2}$ )→NHC-helicene<br>(ML-CT)                                                                         |
|    |       |     |       |         | 165 | 172 | 27.2 | Pt( $d_{z^2}$ )→NHC-helicene<br>(ML-CT)                                                                         |
|    |       |     |       |         | 165 | 173 | 24.1 | Pt( $d_{z^2}$ )→anisole-NHC-<br>helicene-Pt<br>(MM & ML-CT)                                                     |
| 13 | 4.036 | 307 | 0.491 | -108.61 | 164 | 170 | 79.6 | anisole-Pt-dbm→dbm<br>( $\pi$ - $\pi^*$ & IL- & LL- & ML-CT)                                                    |
| 14 | 4.161 | 298 | 0.171 | 18.57   | 166 | 170 | 70.6 | helicene-anisole-Pt→dbm<br>(LL- & ML-CT)                                                                        |
| 15 | 4.212 | 294 | 0.171 | 2.46    | 162 | 170 | 25.7 | Pt-dbm→dbm<br>( $\pi$ - $\pi^*$ & IL- & ML-CT)                                                                  |
|    |       |     |       |         | 167 | 172 | 25.5 | anisole-NHC-helicene-Pt-<br>dbm <sub>core</sub> →NHC-helicene<br>( $\pi$ - $\pi^*$ & IL- & LL- & ML-CT)         |
|    |       |     |       |         | 166 | 171 | 14.4 | helicene-anisole-Pt→NHC-<br>helicene<br>( $\pi$ - $\pi^*$ & IL- & ML-CT)                                        |
| 16 | 4.221 | 294 | 0.135 | 50.53   | 162 | 170 | 28.7 | Pt-dbm→dbm<br>( $\pi$ - $\pi^*$ & IL- & ML-CT)                                                                  |
|    |       |     |       |         | 167 | 172 | 21.4 | anisole-NHC-helicene-Pt-<br>dbm <sub>core</sub> →NHC-helicene<br>( $\pi$ - $\pi^*$ & IL- & LL- & ML-CT)         |
| 19 | 4.302 | 288 | 0.297 | -155.78 | 168 | 173 | 60.0 | NHC-helicene-Pt-dbm <sub>core</sub> →<br>anisole-NHC-helicene-Pt<br>( $\pi$ - $\pi^*$ & MM & IL- & LL- & ML-CT) |
|    |       |     |       |         | 166 | 171 | 15.8 | helicene-anisole-Pt→NHC-<br>helicene<br>( $\pi$ - $\pi^*$ & IL- & ML-CT)                                        |

**Table S2.6:** Selected dominant excitations and occupied (occ) – unoccupied (unocc) MO-pair contributions (greater than 10%) for helicene-NHC-Pt complex **Pt2-IV**. For MOs visualization, see Figure S2.7. Based on TDDFT-PBE0//SDD/SV(P) with continuum solvent model for toluene calculations.

| Excitation | $E / \text{eV}$ | $\lambda / \text{nm}$ | $f$   | $R / 10^{-40} \text{ cgs}$ | occ no. | unocc no. | %    | Assignment                                                                                          |
|------------|-----------------|-----------------------|-------|----------------------------|---------|-----------|------|-----------------------------------------------------------------------------------------------------|
| 1          | 3.157           | 393                   | 0.075 | -13.59                     | 169     | 170       | 86.7 | anisole-NHC-Pt→dbm<br>(LL- & ML-CT)                                                                 |
| 2          | 3.228           | 384                   | 0.039 | 42.42                      | 169     | 171       | 79.8 | anisole-NHC-Pt→NHC-helicene<br>(IL- & ML-CT)                                                        |
| 3          | 3.408           | 364                   | 0.005 | 23.82                      | 169     | 172       | 55.7 | anisole-NHC-Pt→NHC-helicene<br>(IL- & ML-CT)                                                        |
|            |                 |                       |       |                            | 168     | 171       | 22.3 | NHC-helicene-Pt-dbm <sub>core</sub> →NHC-helicene<br>( $\pi$ - $\pi^*$ & LL- & ML-CT)               |
| 4          | 3.433           | 361                   | 0.033 | 51.19                      | 168     | 170       | 77.3 | NHC-helicene-Pt-dbm <sub>core</sub> →dbm<br>( $\pi$ - $\pi^*$ & IL- & LL- & ML-CT)                  |
| 5          | 3.572           | 347                   | 0.467 | 86.73                      | 168     | 171       | 29.8 | NHC-helicene-Pt-dbm <sub>core</sub> →NHC-helicene<br>( $\pi$ - $\pi^*$ & LL- & ML-CT)               |
|            |                 |                       |       |                            | 168     | 172       | 23.8 | NHC-helicene-Pt-dbm <sub>core</sub> →NHC-helicene<br>( $\pi$ - $\pi^*$ & LL- & ML-CT)               |
|            |                 |                       |       |                            | 169     | 172       | 19.4 | anisole-NHC-Pt→NHC-helicene<br>(IL- & ML-CT)                                                        |
| 8          | 3.819           | 325                   | 0.091 | -21.14                     | 167     | 170       | 71.2 | anisole-NHC-helicene-Pt-dbm <sub>core</sub> →dbm<br>( $\pi$ - $\pi^*$ & IL- & LL- & ML-CT)          |
| 9          | 3.838           | 323                   | 0.075 | -51.68                     | 169     | 173       | 57.2 | anisole-NHC-Pt→anisole-NHC-helicene-Pt<br>( $\pi$ - $\pi^*$ & MM & IL- & ML-CT)                     |
| 10         | 3.923           | 316                   | 0.091 | -24.27                     | 167     | 171       | 39.0 | anisole-NHC-helicene-Pt-dbm <sub>core</sub> →NHC-helicene<br>( $\pi$ - $\pi^*$ & IL- & LL- & ML-CT) |
|            |                 |                       |       |                            | 167     | 172       | 19.7 | anisole-NHC-helicene-Pt-dbm <sub>core</sub> →NHC-helicene<br>( $\pi$ - $\pi^*$ & IL- & LL- & ML-CT) |
|            |                 |                       |       |                            | 166     | 171       | 12.0 | helicene-anisole-Pt→NHC-helicene                                                                    |

|    |       |     |       |         |     |     |      |                                                                                                                 |
|----|-------|-----|-------|---------|-----|-----|------|-----------------------------------------------------------------------------------------------------------------|
|    |       |     |       |         |     |     |      | ( $\pi$ - $\pi^*$ & IL- & ML-CT)                                                                                |
| 11 | 3.932 | 315 | 0.192 | 349.81  | 167 | 171 | 31.1 | anisole-NHC-helicene-Pt-<br>dbm <sub>core</sub> →NHC-helicene<br>( $\pi$ - $\pi^*$ & IL- & LL- & ML-CT)         |
|    |       |     |       |         | 168 | 172 | 24.1 | NHC-helicene-Pt-<br>dbm <sub>core</sub> →NHC-helicene<br>( $\pi$ - $\pi^*$ & LL- & ML-CT)                       |
|    |       |     |       |         | 166 | 171 | 13.0 | helicene-anisole-Pt→NHC-<br>helicene<br>( $\pi$ - $\pi^*$ & IL- & ML-CT)                                        |
| 12 | 4.006 | 309 | 0.013 | -42.35  | 165 | 171 | 36.9 | Pt( $d_{z^2}$ )→NHC-helicene<br>(ML-CT)                                                                         |
|    |       |     |       |         | 165 | 172 | 29.8 | Pt( $d_{z^2}$ )→NHC-helicene<br>(ML-CT)                                                                         |
|    |       |     |       |         | 165 | 173 | 25.0 | Pt( $d_{z^2}$ )→anisole-NHC-<br>helicene-Pt<br>(MM & ML-CT)                                                     |
| 13 | 4.038 | 307 | 0.475 | -102.26 | 164 | 170 | 80.8 | anisole-Pt-dbm→dbm<br>( $\pi$ - $\pi^*$ & IL- & LL- & ML-CT)                                                    |
| 14 | 4.164 | 298 | 0.172 | 2.96    | 166 | 170 | 71.1 | helicene-anisole-Pt→dbm<br>(LL- & ML-CT)                                                                        |
| 15 | 4.210 | 294 | 0.110 | 12.49   | 162 | 170 | 39.0 | Pt-dbm→dbm<br>( $\pi$ - $\pi^*$ & IL- & ML-CT)                                                                  |
|    |       |     |       |         | 167 | 172 | 18.5 | anisole-NHC-helicene-Pt-<br>dbm <sub>core</sub> →NHC-helicene<br>( $\pi$ - $\pi^*$ & IL- & LL- & ML-CT)         |
| 16 | 4.219 | 294 | 0.206 | 14.17   | 167 | 172 | 27.0 | anisole-NHC-helicene-Pt-<br>dbm <sub>core</sub> →NHC-helicene<br>( $\pi$ - $\pi^*$ & IL- & LL- & ML-CT)         |
|    |       |     |       |         | 162 | 170 | 21.9 | Pt-dbm→dbm<br>( $\pi$ - $\pi^*$ & IL- & ML-CT)                                                                  |
| 19 | 4.299 | 288 | 0.287 | -170.27 | 168 | 173 | 62.4 | NHC-helicene-Pt-dbm <sub>core</sub> →<br>anisole-NHC-helicene-Pt<br>( $\pi$ - $\pi^*$ & MM & IL- & LL- & ML-CT) |
|    |       |     |       |         | 166 | 171 | 17.0 | helicene-anisole-Pt→NHC-<br>helicene<br>( $\pi$ - $\pi^*$ & IL- & ML-CT)                                        |

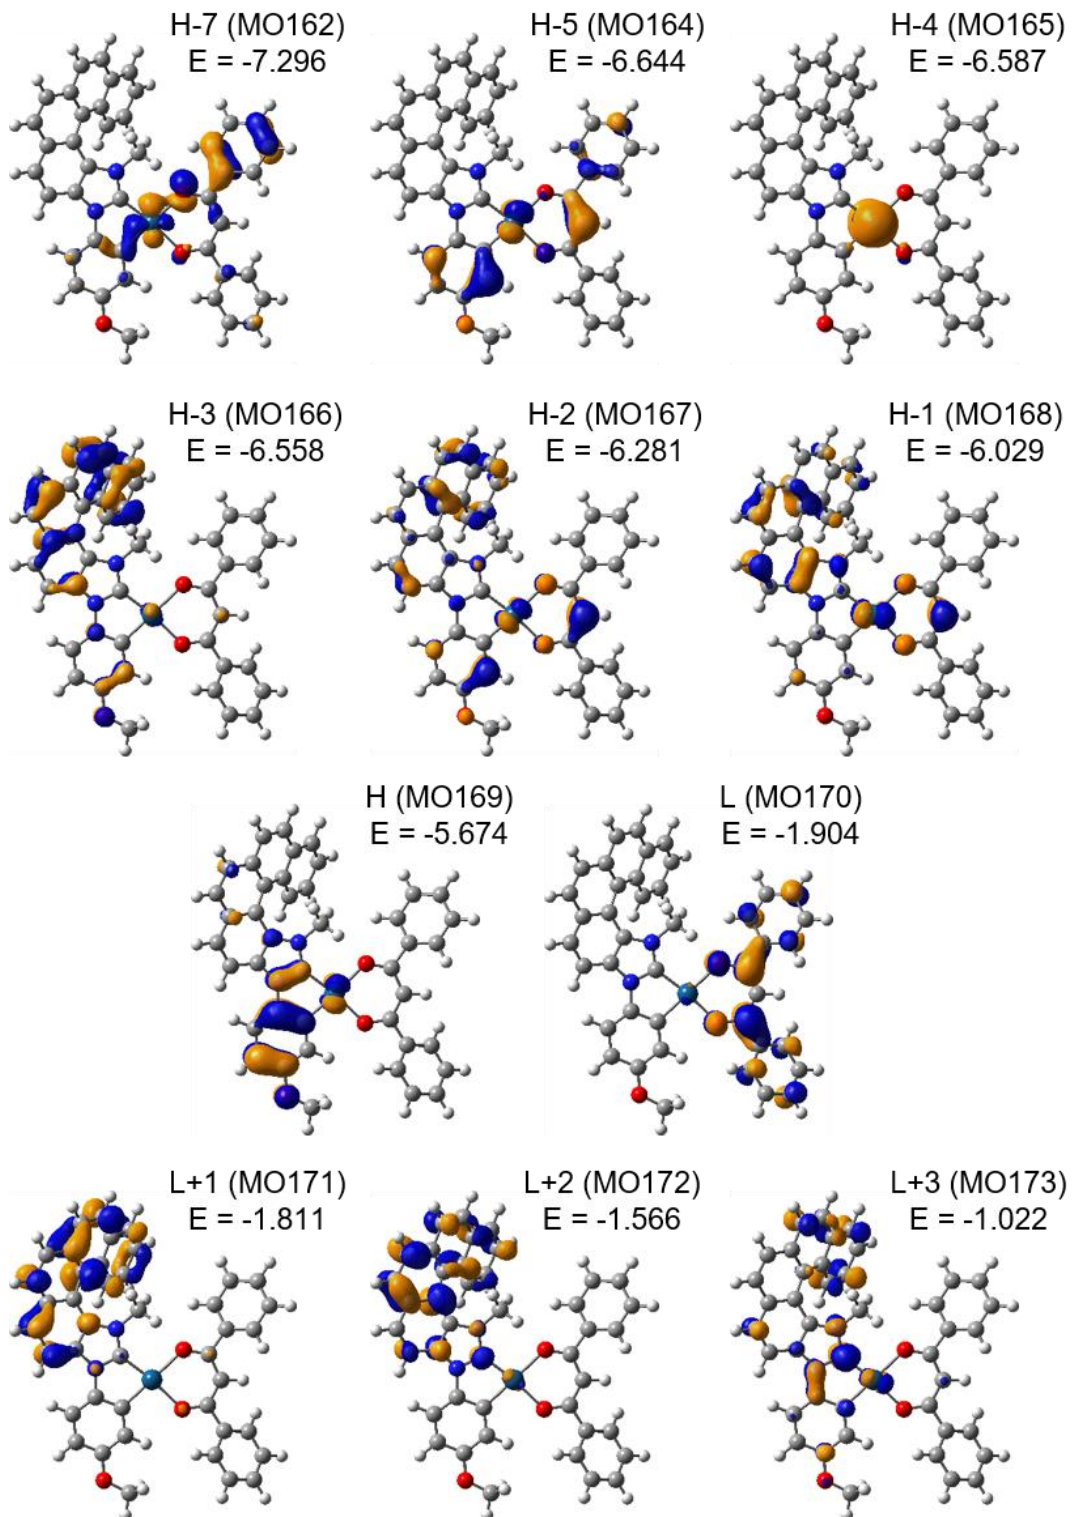

**Figure S2.7:** Isosurfaces ( $\pm 0.04$  au) of MOs involved in selected electronic transitions of **Pt2-I**. Based on PBE0//SDD/SV(P) with continuum solvent model for toluene calculations. H = HOMO, L = LUMO. Values  $E$  listed are orbital energies, in eV. Isosurfaces of the corresponding MOs for **Pt2** conformers II-IV appeared to be very similar and therefore they are not shown.

a)

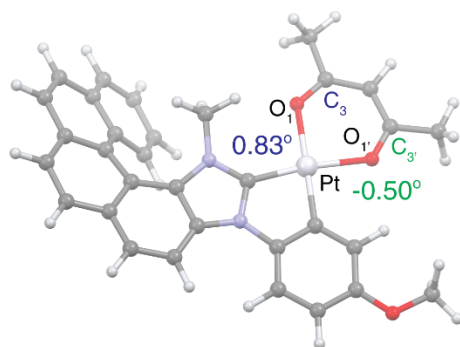

(*P*)-Pt1

(*P*)-Pt2-II

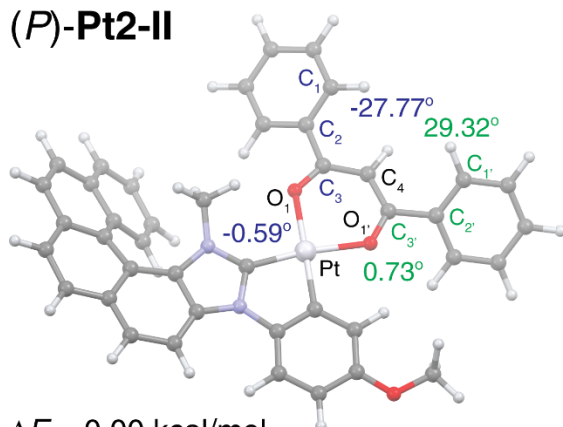

$\Delta E = 0.00$  kcal/mol  
 $\Delta G = 0.00$  kcal/mol

(*P*)-Pt2-II'

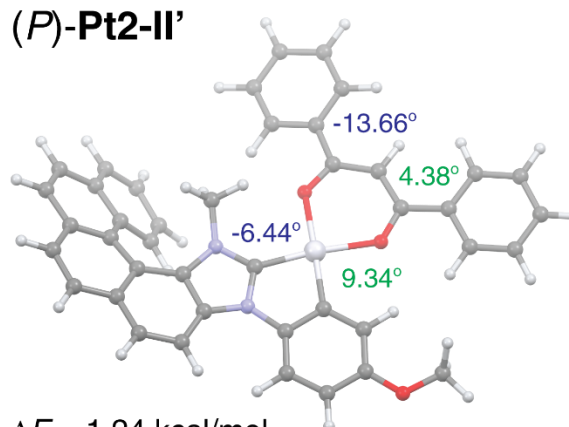

$\Delta E = 1.24$  kcal/mol  
 $\Delta G = 0.63$  kcal/mol

b)

(*P*)-Pt2-II

vs.

(*P*)-Pt2-II'

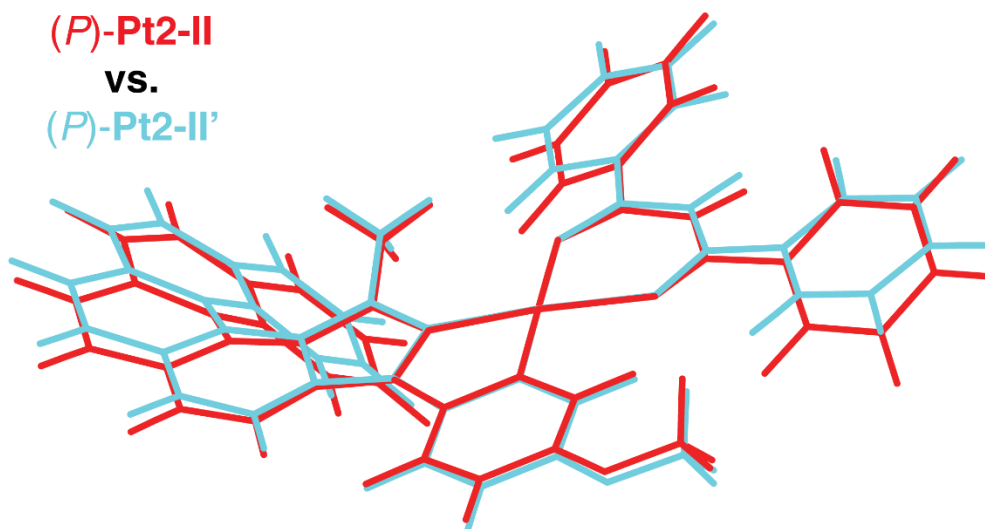

**Figure S2.8:** a) Selected optimized (TDA-TDDFT-PBE0//SDD/SV(P) with continuum solvent model for toluene) triplet excited-state structures of helicene-NHC-Pt complexes **Pt1** and **Pt2**. Values listed are dihedral angles (as defined on the structures **Pt1** and **Pt2-II**) and relative energies  $\Delta E$  and free energies  $\Delta G$ . b) Overlay of the corresponding **Pt2-II** (red) and **Pt2-II'** (blue) structures. See Table S2.7 for a full set of computed results.



**Table S2.7:** Structural, energetic and electronic characterization of optimized triplet excited-state structures of helicene-NHC-Pt complexes **Pt1** and **Pt2**:  $\angle$  – dihedral angles as defined in Figure S2.8, in degree;  $\Delta E$  and  $\Delta G$  – relative energy and free-energy values, in kcal/mol;  $\lambda$  –  $T_1$ - $S_0$  energy difference at optimized  $T_1$  excited-state geometry, corresponding to phosphorescence energy, in nm; assignment – MO-to-MO: % transitions assignment (for MO-pair contributions greater than 10%), see Figures S2.9-S2.11 for MOs isosurfaces (see also Figure S2.12). Based on TDDFT- and TDA-TDDFT-PBE0//SDD/SV(P) with continuum solvent model for toluene calculations.

| Structure                              | $\angle C_1C_2C_3C_4$ | $\angle C_1C_2C_3C_4$ | $\angle C_3O_1PtO_1'$ | $\angle C_3O_1PtO_1$ | $\Delta E$ | $\Delta G$ | $\lambda$ | assignment                                                                                                    |
|----------------------------------------|-----------------------|-----------------------|-----------------------|----------------------|------------|------------|-----------|---------------------------------------------------------------------------------------------------------------|
| TDA-TDDFT-PBE0//SDD/SV(P) PCM(toluene) |                       |                       |                       |                      |            |            |           |                                                                                                               |
| <b>Pt1</b>                             | –                     | –                     | 0.83                  | -0.50                | –          | –          | 568       | 138-to-136: 53.5<br>NHC-helicene→anisole-NHC-helicene-Pt-acac<br>( $\pi$ - $\pi^*$ & IL- & LL- & LM-CT)       |
|                                        |                       |                       |                       |                      |            |            |           | 138-to-137: 28.2<br>NHC-helicene→ anisole-NHC-helicene-Pt<br>( $\pi$ - $\pi^*$ & IL- & LM-CT)                 |
| <b>Pt2-I</b>                           | -27.70                | -28.39                | -0.95                 | -0.68                | 0.00       | 0.35       | 568       | 170-to-168: 52.5<br>NHC-helicene→anisole-NHC-helicene-Pt-acac<br>( $\pi$ - $\pi^*$ & IL- & LL- & LM-CT)       |
|                                        |                       |                       |                       |                      |            |            |           | 170-to-169: 29.4<br>NHC-helicene→ anisole-NHC-helicene-Pt<br>( $\pi$ - $\pi^*$ & IL- & LM-CT)                 |
| <b>Pt2-II</b>                          | -27.77                | 29.32                 | -0.59                 | 0.73                 | 0.00       | 0.00       | 569       | 170-to-168: 52.2<br>NHC-helicene→anisole-NHC-helicene-Pt-acac<br>( $\pi$ - $\pi^*$ & IL- & LL- & LM-CT)       |
|                                        |                       |                       |                       |                      |            |            |           | 170-to-169: 29.9<br>NHC-helicene→ anisole-NHC-helicene-Pt<br>( $\pi$ - $\pi^*$ & IL- & LM-CT)                 |
| <b>Pt2-II'</b>                         | -13.66                | 4.38                  | -6.44                 | 9.34                 | 1.24       | 0.63       | 535       | 170-to-168: 60.8<br>dbm-Pt→NHC-helicene-Pt-dbm <sub>core</sub><br>( $\pi$ - $\pi^*$ & MM & IL- & LL- & LM-CT) |
|                                        |                       |                       |                       |                      |            |            |           | 170-to-167: 19.7<br>dbm-Pt→ anisole-NHC-helicene-Pt-dbm <sub>core</sub>                                       |

|                                           |        |        |        |       |      |      |     |                                                     |  |
|-------------------------------------------|--------|--------|--------|-------|------|------|-----|-----------------------------------------------------|--|
|                                           |        |        |        |       |      |      |     | ( $\pi$ - $\pi^*$ & MM & IL- & LL- & LM-CT)         |  |
|                                           |        |        |        |       |      |      |     | 170-to-168: 61.3                                    |  |
| <b>Pt2-II''</b>                           | -13.27 | 11.09  | -19.78 | 23.27 | 1.22 | 2.39 | 544 | dbm-Pt→NHC-helicene-Pt-dbm <sub>core</sub>          |  |
|                                           |        |        |        |       |      |      |     | ( $\pi$ - $\pi^*$ & MM & IL- & LL- & LM-CT)         |  |
|                                           |        |        |        |       |      |      |     | 170-to-167: 20.5                                    |  |
|                                           |        |        |        |       |      |      |     | dbm-Pt→ anisole-NHC-helicene-Pt-dbm <sub>core</sub> |  |
|                                           |        |        |        |       |      |      |     | ( $\pi$ - $\pi^*$ & MM & IL- & LL- & LM-CT)         |  |
|                                           |        |        |        |       |      |      |     | 170-to-168: 53.8                                    |  |
| <b>Pt2-III</b>                            | 27.80  | 29.24  | 3.36   | 0.83  | 0.57 | 0.51 | 565 | NHC-helicene→anisole-NHC-helicene-Pt-acac           |  |
|                                           |        |        |        |       |      |      |     | ( $\pi$ - $\pi^*$ & IL- & LL- & LM-CT)              |  |
|                                           |        |        |        |       |      |      |     | 170-to-169: 27.9                                    |  |
|                                           |        |        |        |       |      |      |     | NHC-helicene→ anisole-NHC-helicene-Pt               |  |
|                                           |        |        |        |       |      |      |     | ( $\pi$ - $\pi^*$ & IL- & LM-CT)                    |  |
|                                           |        |        |        |       |      |      |     | 170-to-168: 54.1                                    |  |
| <b>Pt2-IV</b>                             | 27.58  | -28.09 | 3.12   | -0.72 | 0.60 | 0.66 | 565 | NHC-helicene→anisole-NHC-helicene-Pt-acac           |  |
|                                           |        |        |        |       |      |      |     | ( $\pi$ - $\pi^*$ & IL- & LL- & LM-CT)              |  |
|                                           |        |        |        |       |      |      |     | 170-to-169: 27.4                                    |  |
|                                           |        |        |        |       |      |      |     | NHC-helicene→ anisole-NHC-helicene-Pt               |  |
|                                           |        |        |        |       |      |      |     | ( $\pi$ - $\pi^*$ & IL- & LM-CT)                    |  |
| <i>TDDFT-PBE0//SDD/SV(P) PCM(toluene)</i> |        |        |        |       |      |      |     |                                                     |  |
|                                           |        |        |        |       |      |      |     | 138-to-136: 65.4                                    |  |
| <b>Pt1</b>                                | –      | –      | 0.86   | -0.53 | –    | –    | 685 | NHC-helicene→NHC-helicene-Pt-acac                   |  |
|                                           |        |        |        |       |      |      |     | ( $\pi$ - $\pi^*$ & LL- & LM-CT)                    |  |
|                                           |        |        |        |       |      |      |     | 138-to-135: 11.2                                    |  |
|                                           |        |        |        |       |      |      |     | NHC-helicene→ anisole-NHC-helicene-Pt-acac          |  |
|                                           |        |        |        |       |      |      |     | ( $\pi$ - $\pi^*$ & IL- & LL- & LM-CT)              |  |
|                                           |        |        |        |       |      |      |     | 170-to-168: 59.0                                    |  |
| <b>Pt2-II</b>                             | -27.98 | 29.22  | -0.82  | 0.83  | –    | –    | 684 | NHC-helicene→anisole-NHC-helicene-Pt-acac           |  |
|                                           |        |        |        |       |      |      |     | ( $\pi$ - $\pi^*$ & IL- & LL- & LM-CT)              |  |
|                                           |        |        |        |       |      |      |     | 170-to-169: 12.6                                    |  |

|                |        |      |       |      |   |   |     |  |                                                                                                                                                                                                                                                                                                                      |
|----------------|--------|------|-------|------|---|---|-----|--|----------------------------------------------------------------------------------------------------------------------------------------------------------------------------------------------------------------------------------------------------------------------------------------------------------------------|
|                |        |      |       |      |   |   |     |  | NHC-helicene→ anisole-NHC-helicene-Pt<br>( $\pi$ - $\pi^*$ & IL- & LM-CT)<br>170-to-168: 59.5<br>dbm-Pt→NHC-helicene-Pt-dbm <sub>core</sub><br>( $\pi$ - $\pi^*$ & MM & IL- & LL- & LM-CT)<br>170-to-167: 21.0<br>dbm-Pt→ anisole-NHC-helicene-Pt-dbm <sub>core</sub><br>( $\pi$ - $\pi^*$ & MM & IL- & LL- & LM-CT) |
| <b>Pt2-II'</b> | -13.91 | 2.64 | -4.78 | 7.37 | – | – | 565 |  |                                                                                                                                                                                                                                                                                                                      |

**Table S2.8:** Structural, energetic and electronic characterization of optimized triplet excited-state structures of helicene-NHC-Pt complexes **Pt1** and **Pt2**:  $\angle$  – dihedral angles as defined in Figure S2.8, in degree;  $\Delta E$  and  $\Delta G$  – relative energy and free-energy values, in kcal/mol;  $\lambda$  –  $T_1$ - $S_0$  energy difference at optimized  $T_1$  excited-state geometry, corresponding to phosphorescence energy, in nm; assignment – MO-to-MO: % transitions assignment (for MO-pair contributions greater than 10%), see Figures S2.9-S2.11 for MOs isosurfaces (see also Figure S2.12). Based on TDDFT- and TDA-TDDFT-PBE0//SDD/SV(P) with continuum solvent model for THF calculations.

| Structure                          | $\angle C_1C_2C_3C_4$ | $\angle C_1C_2C_3C_4$ | $\angle C_3O_1PtO_1'$ | $\angle C_3O_1PtO_1$ | $\Delta E$ | $\Delta G$ | $\lambda$ | assignment                                                                                                                                                                                                                   |
|------------------------------------|-----------------------|-----------------------|-----------------------|----------------------|------------|------------|-----------|------------------------------------------------------------------------------------------------------------------------------------------------------------------------------------------------------------------------------|
| TDA-TDDFT-PBE0//SDD/SV(P) PCM(THF) |                       |                       |                       |                      |            |            |           |                                                                                                                                                                                                                              |
| <b>Pt1</b>                         | –                     | –                     | 0.42                  | -0.12                | –          | –          | 565       | 138-to-136: 45.8<br>NHC-helicene→anisole-NHC-helicene-Pt-acac<br>( $\pi$ - $\pi^*$ & IL- & LL- & LM-CT)<br>138-to-137: 38.3<br>NHC-helicene→ anisole-NHC-helicene-Pt<br>( $\pi$ - $\pi^*$ & IL- & LM-CT)<br>170-to-168: 43.3 |
| <b>Pt2-I</b>                       | -26.98                | -27.53                | -1.89                 | 0.06                 | 0.04       | 0.14       | 566       | NHC-helicene→anisole-NHC-helicene-Pt-acac<br>( $\pi$ - $\pi^*$ & IL- & LL- & LM-CT)<br>170-to-169: 39.1<br>NHC-helicene→ anisole-NHC-helicene-Pt<br>( $\pi$ - $\pi^*$ & IL- & LM-CT)<br>170-to-168: 43.6                     |
| <b>Pt2-II</b>                      | -27.16                | 28.12                 | -0.75                 | 1.27                 | 0.00       | 0.00       | 566       | NHC-helicene→anisole-NHC-helicene-Pt-acac                                                                                                                                                                                    |

|                 |        |        |        |       |      |      |     |                                                                                                                                                                                                          |                                                                                                                                                                                                           |
|-----------------|--------|--------|--------|-------|------|------|-----|----------------------------------------------------------------------------------------------------------------------------------------------------------------------------------------------------------|-----------------------------------------------------------------------------------------------------------------------------------------------------------------------------------------------------------|
|                 |        |        |        |       |      |      |     |                                                                                                                                                                                                          | ( $\pi$ - $\pi^*$ & IL- & LL- & LM-CT)<br>170-to-169: 40.0<br>NHC-helicene→ anisole-NHC-helicene-Pt<br>( $\pi$ - $\pi^*$ & IL- & LM-CT)<br>170-to-168: 49.9<br>dbm-Pt→NHC-helicene-Pt-dbm <sub>core</sub> |
| <b>Pt2-II''</b> | -11.62 | 10.42  | -22.57 | 26.69 | 1.21 | 2.38 | 543 | ( $\pi$ - $\pi^*$ & MM & IL- & LL- & LM-CT)<br>170-to-167: 34.2<br>dbm-Pt→ anisole-NHC-helicene-Pt-dbm <sub>core</sub><br>( $\pi$ - $\pi^*$ & MM & IL- & LL- & LM-CT)<br>170-to-168: 43.6                |                                                                                                                                                                                                           |
| <b>Pt2-III</b>  | 27.24  | 28.48  | 2.62   | 1.54  | 0.49 | 0.78 | 564 | NHC-helicene→anisole-NHC-helicene-Pt-acac<br>( $\pi$ - $\pi^*$ & IL- & LL- & LM-CT)<br>170-to-169: 36.2<br>NHC-helicene→ anisole-NHC-helicene-Pt<br>( $\pi$ - $\pi^*$ & IL- & LM-CT)<br>170-to-168: 43.8 |                                                                                                                                                                                                           |
| <b>Pt2-IV</b>   | 27.22  | -27.38 | 1.67   | 0.48  | 0.49 | 0.70 | 563 | NHC-helicene→anisole-NHC-helicene-Pt-acac<br>( $\pi$ - $\pi^*$ & IL- & LL- & LM-CT)<br>170-to-169: 35.6<br>NHC-helicene→ anisole-NHC-helicene-Pt<br>( $\pi$ - $\pi^*$ & IL- & LM-CT)                     |                                                                                                                                                                                                           |

---

*TDDFT-PBE0//SDD/SV(P) PCM(THF)*

---

|                 |        |       |        |       |   |   |     |                                                                                                               |
|-----------------|--------|-------|--------|-------|---|---|-----|---------------------------------------------------------------------------------------------------------------|
| <b>Pt1</b>      | -      | -     | 0.50   | -0.20 | - | - | 686 | 138-to-136: 67.7<br>NHC-helicene→NHC-helicene-Pt-acac<br>( $\pi$ - $\pi^*$ & LL- & LM-CT)<br>170-to-168: 64.4 |
| <b>Pt2-II</b>   | -27.71 | 28.10 | -1.08  | 1.53  | - | - | 685 | NHC-helicene→anisole-NHC-helicene-Pt-acac<br>( $\pi$ - $\pi^*$ & IL- & LL- & LM-CT)<br>170-to-168: 48.0       |
| <b>Pt2-II''</b> | -11.94 | 8.77  | -19.23 | 23.17 | - | - | 569 | dbm-Pt→NHC-helicene-Pt-dbm <sub>core</sub>                                                                    |

( $\pi$ - $\pi^*$  & MM & IL- & LL- & LM-  
CT)

170-to-167: 35.2

dbm-Pt  $\rightarrow$  anisole-NHC-  
helicene-Pt-dbm<sub>core</sub>

( $\pi$ - $\pi^*$  & MM & IL- & LL- & LM-  
CT)

---

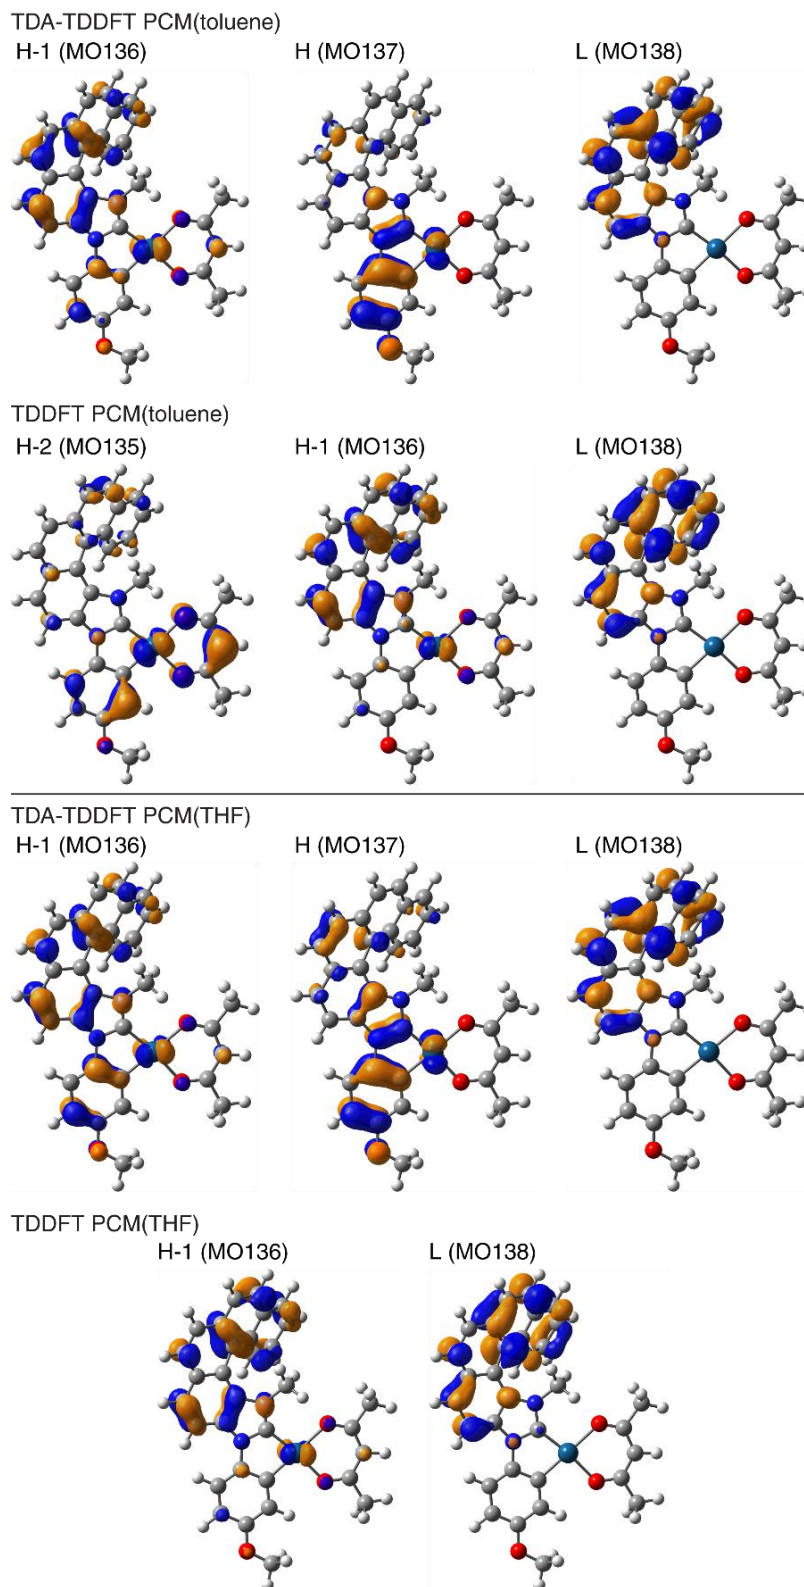

**Figure S2.9:** Isosurfaces ( $\pm 0.04$  au) of MOs of  $S_0$  at  $T_1$  excited-state geometry (optimized at TDDFT- or TDA-TDDFT-PBE0//SDD/SV(P) PCM(toluene) or PCM(THF) level, as indicated) involved in  $T_1$ - $S_0$  emission transitions of **Pt1**. H = HOMO, L = LUMO.

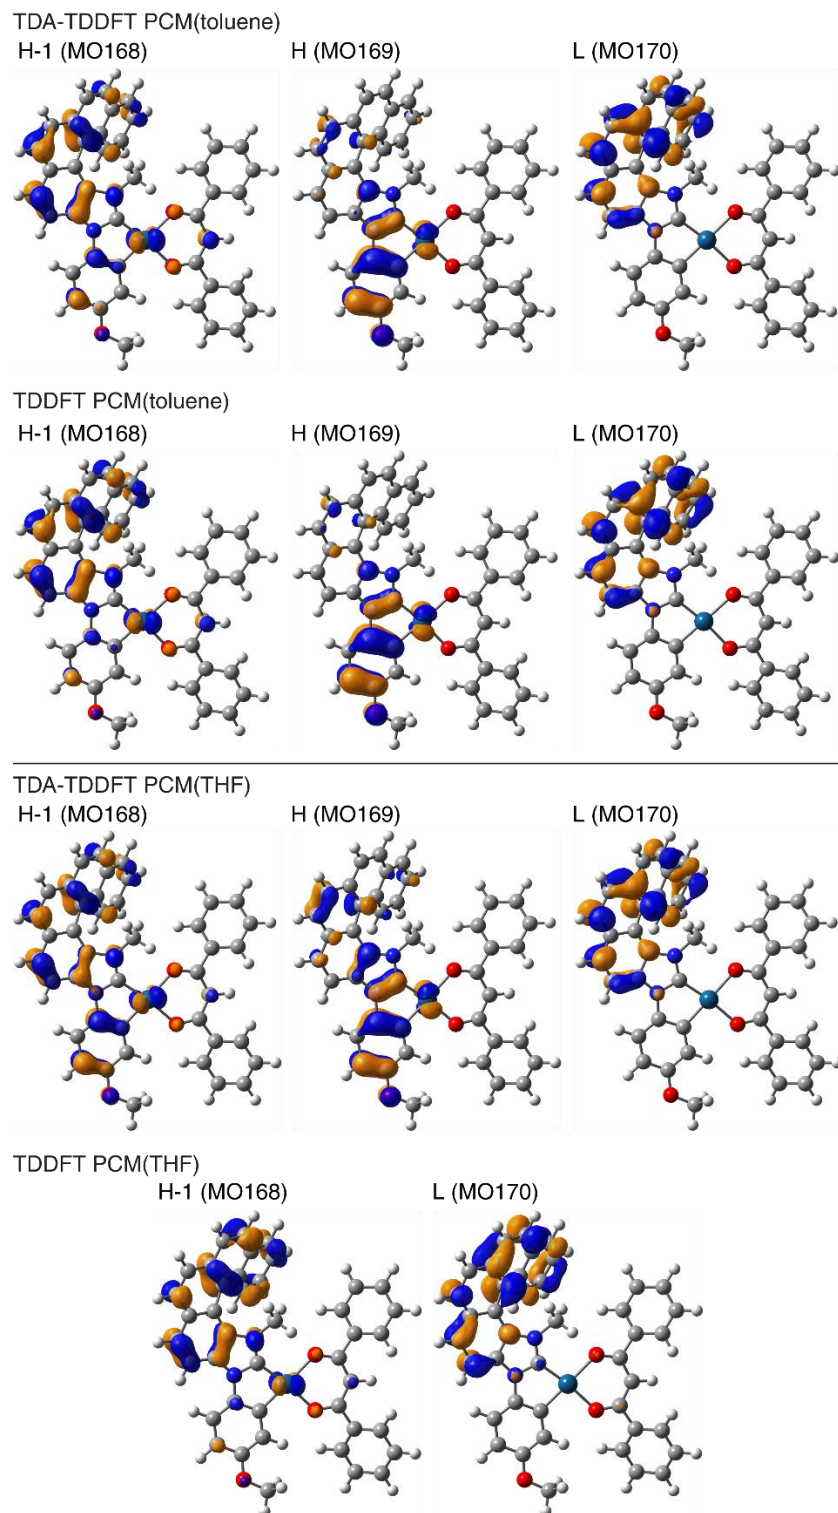

**Figure S2.10:** Isosurfaces ( $\pm 0.04$  au) of MOs of  $S_0$  at  $T_1$  excited-state geometry (optimized at TDDFT- or TDA-TDDFT-PBE0//SDD/SV(P) PCM(toluene) or PCM(THF) level, as indicated) involved in  $T_1$ - $S_0$  emission transitions of **Pt2-II**. H = HOMO, L = LUMO. Isosurfaces of the corresponding MOs for other computed  $T_1$  rotameric structures, **Pt2-I**, **Pt2-III** and **Pt2-IV**, appeared to be very similar and therefore they are not shown.

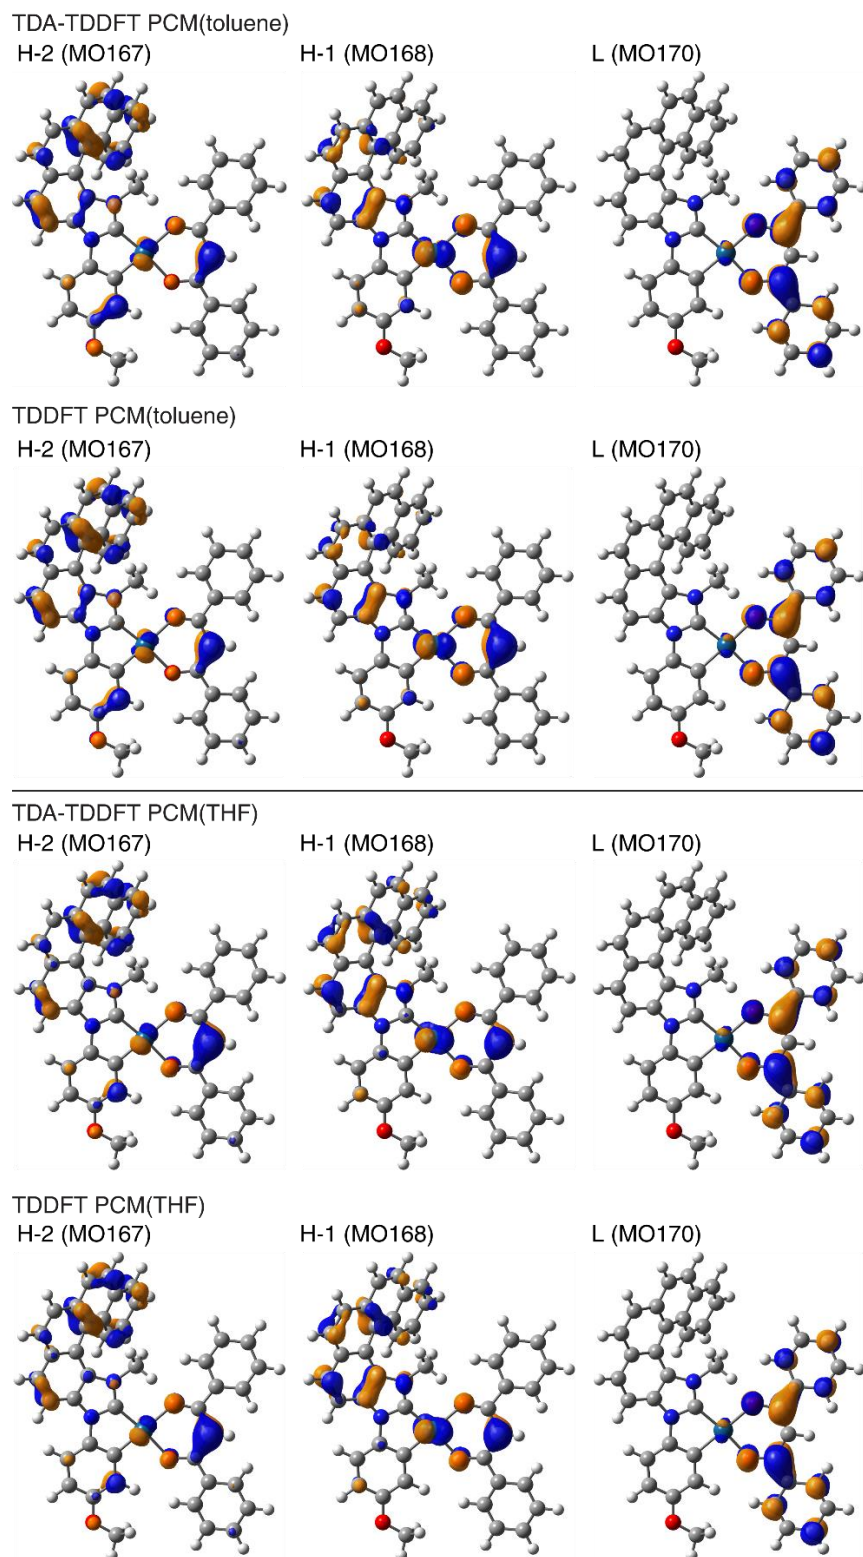

**Figure S2.11:** Isosurfaces ( $\pm 0.04$  au) of MOs of  $S_0$  at  $T_1$  excited-state geometry (optimized at TDDFT- or TDA-TDDFT-PBE0//SDD/SV(P) PCM(toluene) or PCM(THF) level, as indicated) involved in  $T_1$ - $S_0$  emission transitions of **Pt2-II'** (for PCM(toluene)) and **Pt2-II''** (for PCM(THF)); isosurfaces representative also for **Pt2-II''** for PCM(toluene)). H = HOMO, L = LUMO.



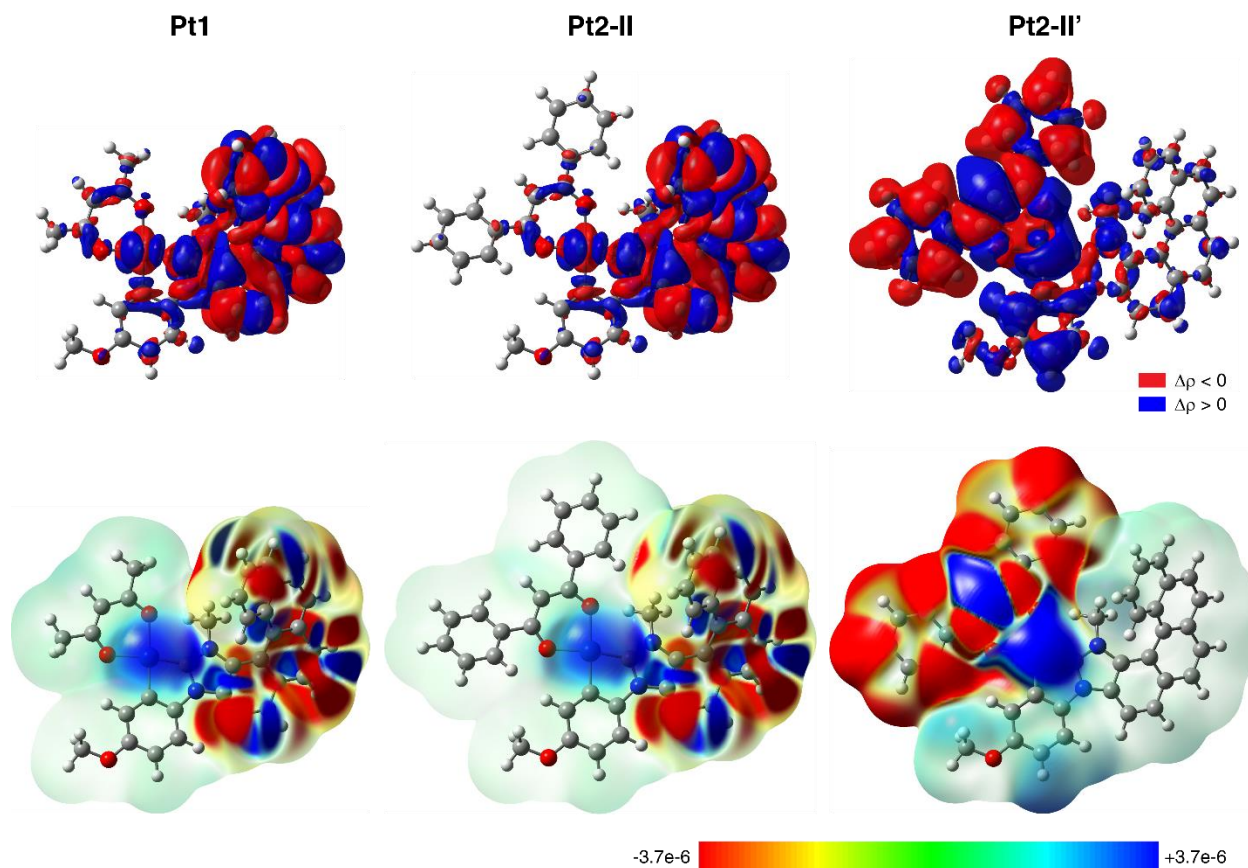

**Figure S2.12:** Isosurfaces ( $\pm 0.0001$  au) of the electron difference density between the  $S_0$  ground state and  $T_1$  excited state,  $\Delta\rho = \rho_g - \rho_e$  (top) along with isosurfaces ( $0.0001$  au) of  $\rho_g$  color-mapped using the value of  $\Delta\rho$  (bottom) for the helicene-NHC-Pt complexes **Pt1** and **Pt2** (conformers II and II') based on the TDA-TDDFT-PBE0//SDD/SV(P) PCM(toluene) calculations. Electron density moves from the red region to the blue region when moving from the excited state to the ground state. Note that TDA-TDDFT-PBE0//SDD/SV(P) PCM(THF) and the corresponding TDDFT-PBE0//SDD/SV(P) PCM(toluene) and PCM(THF) calculations gave essentially the same results.

### S2.3. Cartesian coordinates for optimized structures

Optimized (DFT-B3LYP//SDD/SV(P) with continuum solvent (toluene) model) geometries of the studied systems along with the corresponding absolute energies:

The atomic symbol followed by three Cartesian coordinates, in Å.

#### (P)-Pt1

Total energy = -1688.549796 au

|   |          |          |          |
|---|----------|----------|----------|
| C | 2.525393 | 1.245967 | 0.135346 |
| C | 1.545090 | 2.254076 | 0.265208 |
| C | 1.884676 | 3.571892 | 0.579913 |
| C | 3.230183 | 3.909275 | 0.737992 |
| C | 4.227846 | 2.931095 | 0.591939 |
| C | 3.870489 | 1.601653 | 0.298474 |

|    |           |           |           |
|----|-----------|-----------|-----------|
| N  | 0.225560  | 1.749850  | 0.073700  |
| C  | 0.140106  | 0.403634  | -0.162204 |
| N  | -1.175789 | 0.108626  | -0.335757 |
| C  | -1.947520 | 1.272477  | -0.183664 |
| C  | -1.034057 | 2.329872  | -0.006768 |
| C  | -3.354100 | 1.504057  | -0.266709 |
| C  | -3.718658 | 2.869885  | -0.531450 |
| C  | -2.764916 | 3.918486  | -0.397878 |
| C  | -1.444199 | 3.677478  | -0.078199 |
| C  | -4.418238 | 0.523089  | -0.129196 |
| C  | -5.675221 | 0.825288  | -0.720487 |
| C  | -5.954616 | 2.154403  | -1.170407 |
| C  | -5.044829 | 3.158530  | -0.982873 |
| C  | -4.324187 | -0.685266 | 0.677288  |
| C  | -5.358848 | -1.673949 | 0.580865  |
| C  | -6.510581 | -1.413543 | -0.229010 |
| C  | -6.687354 | -0.186117 | -0.803023 |
| C  | -3.320742 | -0.885180 | 1.664467  |
| C  | -3.282893 | -2.031276 | 2.440724  |
| C  | -4.247621 | -3.047306 | 2.264653  |
| C  | -5.272096 | -2.860518 | 1.355010  |
| C  | -1.625865 | -1.148857 | -0.934250 |
| Pt | 1.824690  | -0.599870 | -0.212233 |
| O  | 1.052554  | -2.573711 | -0.538837 |
| C  | 1.734093  | -3.643708 | -0.628503 |
| C  | 0.920121  | -4.904061 | -0.845755 |
| O  | 5.508959  | 3.357724  | 0.759472  |
| C  | 6.567095  | 2.433618  | 0.634128  |
| O  | 3.739150  | -1.451209 | -0.205411 |
| C  | 4.041425  | -2.683117 | -0.347487 |
| C  | 5.526088  | -2.975935 | -0.289171 |
| C  | 3.139308  | -3.744747 | -0.545838 |
| H  | -0.741522 | 4.501911  | 0.030154  |
| H  | -3.101443 | 4.946582  | -0.559607 |
| H  | -5.299209 | 4.194851  | -1.225016 |
| H  | -6.940241 | 2.366854  | -1.595356 |
| H  | -7.614227 | 0.050955  | -1.334583 |
| H  | -7.281549 | -2.185661 | -0.313478 |
| H  | -6.057728 | -3.614840 | 1.244198  |
| H  | -4.202245 | -3.959167 | 2.867678  |
| H  | -2.502691 | -2.143140 | 3.199727  |
| H  | -2.574140 | -0.109371 | 1.839150  |
| H  | 1.127708  | 4.343630  | 0.721969  |
| H  | 3.526924  | 4.932332  | 0.981568  |
| H  | 4.628251  | 0.823223  | 0.199003  |
| H  | 6.496150  | 1.623459  | 1.385525  |
| H  | 7.495647  | 3.000845  | 0.804396  |
| H  | 6.600043  | 1.981759  | -0.376168 |
| H  | -0.831059 | -1.519890 | -1.593480 |
| H  | -2.538164 | -0.955832 | -1.515565 |
| H  | -1.832942 | -1.909648 | -0.169450 |
| H  | 3.568857  | -4.742850 | -0.645898 |
| H  | 5.754032  | -4.046188 | -0.411075 |
| H  | 6.044093  | -2.404170 | -1.080503 |
| H  | 5.930971  | -2.628099 | 0.678529  |
| H  | 1.543731  | -5.809103 | -0.913035 |
| H  | 0.199691  | -5.023038 | -0.016191 |
| H  | 0.329321  | -4.804473 | -1.774539 |

**(P)-Pt2-I**

Total energy = -2071.746065 au

|    |           |           |           |
|----|-----------|-----------|-----------|
| C  | -3.121814 | 2.417788  | -0.227379 |
| C  | -1.724771 | 2.617407  | -0.290979 |
| C  | -1.193140 | 4.016235  | -0.420930 |
| C  | 0.091594  | 4.303438  | 0.076538  |
| C  | 0.627073  | 5.588686  | -0.025122 |
| C  | -0.106013 | 6.608729  | -0.642918 |
| C  | -1.378486 | 6.332818  | -1.154854 |
| C  | -1.920091 | 5.049547  | -1.040346 |
| H  | -2.906606 | 4.848623  | -1.465478 |
| H  | -1.953136 | 7.120505  | -1.651930 |
| H  | 0.314994  | 7.615365  | -0.729128 |
| H  | 1.623408  | 5.795109  | 0.378200  |
| H  | 0.662751  | 3.503603  | 0.552726  |
| H  | -3.748025 | 3.305933  | -0.273377 |
| C  | -3.786082 | 1.180671  | -0.112133 |
| C  | -5.285586 | 1.157530  | -0.062266 |
| C  | -6.040501 | 2.218819  | 0.469756  |
| H  | -5.537103 | 3.094309  | 0.887626  |
| C  | -7.436003 | 2.152664  | 0.505692  |
| H  | -8.006488 | 2.981738  | 0.935691  |
| C  | -8.101066 | 1.030401  | 0.000190  |
| H  | -9.194258 | 0.982185  | 0.023465  |
| C  | -7.360280 | -0.031896 | -0.531172 |
| H  | -7.873667 | -0.912147 | -0.930718 |
| C  | -5.965493 | 0.027310  | -0.553152 |
| H  | -5.383239 | -0.800413 | -0.964722 |
| O  | -3.229521 | 0.030804  | -0.066757 |
| O  | -0.839289 | 1.703276  | -0.230243 |
| Pt | -1.183397 | -0.409769 | -0.092200 |
| C  | -1.494388 | -2.379823 | 0.110555  |
| C  | -2.737806 | -3.007180 | 0.260828  |
| H  | -3.637570 | -2.391590 | 0.228102  |
| C  | -2.816987 | -4.397550 | 0.465393  |
| O  | -3.983465 | -5.080908 | 0.617072  |
| C  | -5.205685 | -4.377332 | 0.590370  |
| H  | -5.998262 | -5.127626 | 0.737884  |
| H  | -5.365934 | -3.869570 | -0.380606 |
| H  | -5.264704 | -3.624827 | 1.400199  |
| C  | -1.641741 | -5.164091 | 0.534087  |
| H  | -1.723389 | -6.239476 | 0.709783  |
| C  | -0.394168 | -4.554274 | 0.390695  |
| H  | 0.504462  | -5.165719 | 0.476923  |
| C  | -0.330705 | -3.177186 | 0.165459  |
| N  | 0.857671  | -2.406338 | 0.009920  |
| C  | 0.670173  | -1.055782 | -0.115441 |
| N  | 1.898081  | -0.493110 | -0.275256 |
| C  | 2.081536  | 0.869015  | -0.776701 |
| H  | 2.941382  | 0.880137  | -1.462291 |
| H  | 2.260641  | 1.580567  | 0.040625  |
| H  | 1.169371  | 1.165430  | -1.308737 |
| C  | 2.886890  | -1.489965 | -0.227036 |
| C  | 2.204073  | -2.717595 | -0.130145 |
| C  | 2.867924  | -3.947390 | -0.320761 |
| H  | 2.343325  | -4.900242 | -0.275657 |
| C  | 4.200466  | -3.895796 | -0.676075 |

|   |          |           |           |
|---|----------|-----------|-----------|
| H | 4.727023 | -4.820537 | -0.929021 |
| C | 4.925670 | -2.671890 | -0.733167 |
| C | 6.267984 | -2.654419 | -1.226978 |
| H | 6.713577 | -3.596874 | -1.559392 |
| C | 6.955740 | -1.477685 | -1.343669 |
| H | 7.949738 | -1.455350 | -1.800449 |
| C | 6.434511 | -0.270609 | -0.779444 |
| C | 7.223381 | 0.925802  | -0.792669 |
| H | 8.160935 | 0.921649  | -1.357284 |
| C | 6.826144 | 2.043750  | -0.114427 |
| H | 7.425784 | 2.958682  | -0.146384 |
| C | 5.673572 | 2.003028  | 0.734111  |
| C | 5.379395 | 3.082208  | 1.608125  |
| H | 5.995373 | 3.985227  | 1.548258  |
| C | 4.370758 | 2.985638  | 2.549164  |
| H | 4.167093 | 3.817849  | 3.229724  |
| C | 3.633984 | 1.785324  | 2.655623  |
| H | 2.875052 | 1.676699  | 3.436324  |
| C | 3.871570 | 0.736532  | 1.783216  |
| H | 3.300168 | -0.184996 | 1.903128  |
| C | 4.859317 | 0.822692  | 0.764005  |
| C | 5.162410 | -0.272925 | -0.144894 |
| C | 4.308338 | -1.431233 | -0.348667 |

**(P)-Pt2-II**

Total energy = -2071.746040 au

|    |           |           |           |
|----|-----------|-----------|-----------|
| C  | -3.118460 | 2.417380  | -0.227583 |
| C  | -1.721475 | 2.614907  | -0.304612 |
| C  | -1.188274 | 4.014829  | -0.412947 |
| C  | 0.102653  | 4.291370  | 0.074097  |
| C  | 0.638204  | 5.577869  | -0.009800 |
| C  | -0.101603 | 6.610160  | -0.598580 |
| C  | -1.380795 | 6.345327  | -1.099541 |
| C  | -1.921832 | 5.060403  | -1.003075 |
| H  | -2.914082 | 4.867651  | -1.418394 |
| H  | -1.961034 | 7.143144  | -1.573407 |
| H  | 0.319261  | 7.617974  | -0.670539 |
| H  | 1.639606  | 5.775790  | 0.385131  |
| H  | 0.678536  | 3.482366  | 0.528523  |
| H  | -3.739276 | 3.310094  | -0.190420 |
| C  | -3.782945 | 1.180830  | -0.105538 |
| C  | -5.279397 | 1.163044  | 0.001184  |
| C  | -6.089446 | 2.142924  | -0.600931 |
| H  | -5.634130 | 2.944398  | -1.188145 |
| C  | -7.481179 | 2.084774  | -0.488139 |
| H  | -8.096530 | 2.848057  | -0.974410 |
| C  | -8.085951 | 1.053141  | 0.237983  |
| H  | -9.175726 | 1.011548  | 0.330631  |
| C  | -7.289859 | 0.072518  | 0.841552  |
| H  | -7.755934 | -0.735824 | 1.413720  |
| C  | -5.900179 | 0.121927  | 0.716023  |
| H  | -5.274988 | -0.642148 | 1.184029  |
| O  | -3.226932 | 0.031231  | -0.049523 |
| O  | -0.837621 | 1.698025  | -0.267213 |
| Pt | -1.182632 | -0.414222 | -0.118931 |
| C  | -1.494491 | -2.386984 | 0.054455  |
| C  | -2.740076 | -3.020914 | 0.149934  |
| H  | -3.640655 | -2.408689 | 0.088242  |

|   |           |           |           |
|---|-----------|-----------|-----------|
| C | -2.820994 | -4.415256 | 0.324958  |
| O | -3.989184 | -5.105985 | 0.419742  |
| C | -5.213249 | -4.412416 | 0.320149  |
| H | -6.007049 | -5.170465 | 0.410277  |
| H | -5.314982 | -3.895848 | -0.653671 |
| H | -5.331320 | -3.668907 | 1.132302  |
| C | -1.645896 | -5.178931 | 0.421340  |
| H | -1.729397 | -6.257623 | 0.574422  |
| C | -0.396523 | -4.563717 | 0.324459  |
| H | 0.500783  | -5.175114 | 0.422804  |
| C | -0.330527 | -3.182997 | 0.123637  |
| N | 0.859351  | -2.409625 | -0.007688 |
| C | 0.670819  | -1.059816 | -0.140195 |
| N | 1.899367  | -0.494989 | -0.286354 |
| C | 2.086288  | 0.865119  | -0.791893 |
| H | 2.949464  | 0.872979  | -1.473462 |
| H | 2.262355  | 1.579409  | 0.023650  |
| H | 1.176837  | 1.160371  | -1.329126 |
| C | 2.889592  | -1.489420 | -0.221825 |
| C | 2.208384  | -2.718306 | -0.128908 |
| C | 2.878379  | -3.947013 | -0.304793 |
| H | 2.356825  | -4.901468 | -0.260368 |
| C | 4.215079  | -3.893325 | -0.643908 |
| H | 4.747292  | -4.817860 | -0.885518 |
| C | 4.937549  | -2.667744 | -0.698187 |
| C | 6.285483  | -2.648457 | -1.176416 |
| H | 6.737566  | -3.590963 | -1.499798 |
| C | 6.971148  | -1.470193 | -1.289990 |
| H | 7.970281  | -1.446778 | -1.735366 |
| C | 6.440027  | -0.262398 | -0.736573 |
| C | 7.225696  | 0.936146  | -0.745056 |
| H | 8.169708  | 0.932587  | -1.298812 |
| C | 6.817645  | 2.055382  | -0.075378 |
| H | 7.415102  | 2.971863  | -0.103733 |
| C | 5.655514  | 2.014450  | 0.759996  |
| C | 5.348422  | 3.095773  | 1.626924  |
| H | 5.962776  | 4.000163  | 1.571262  |
| C | 4.329171  | 2.999712  | 2.556515  |
| H | 4.115520  | 3.833603  | 3.231932  |
| C | 3.594237  | 1.797841  | 2.658434  |
| H | 2.826525  | 1.689915  | 3.430599  |
| C | 3.844702  | 0.746741  | 1.792455  |
| H | 3.274246  | -0.175846 | 1.908733  |
| C | 4.844076  | 0.832053  | 0.784531  |
| C | 5.160634  | -0.265882 | -0.116875 |
| C | 4.312213  | -1.427342 | -0.326255 |

**(P)-Pt2-III**

Total energy = -2071.745461 au

|   |           |          |           |
|---|-----------|----------|-----------|
| C | -1.860791 | 5.101736 | 0.211808  |
| C | -1.186060 | 4.013158 | -0.371042 |
| C | 0.033790  | 4.254370 | -1.029191 |
| C | 0.554363  | 5.546548 | -1.120848 |
| C | -0.126816 | 6.621591 | -0.538142 |
| C | -1.332623 | 6.393291 | 0.133485  |
| C | -1.711198 | 2.607375 | -0.297287 |
| C | -3.108335 | 2.408365 | -0.224984 |
| C | -3.775278 | 1.171422 | -0.130876 |

|    |           |           |           |
|----|-----------|-----------|-----------|
| C  | -5.274414 | 1.152568  | -0.072208 |
| C  | -5.916906 | 0.108410  | 0.618570  |
| C  | -7.309818 | 0.057588  | 0.699873  |
| C  | -8.087131 | 1.039771  | 0.074778  |
| C  | -7.460303 | 2.074215  | -0.628278 |
| C  | -6.065694 | 2.133992  | -0.696591 |
| O  | -3.219564 | 0.022256  | -0.063483 |
| Pt | -1.175789 | -0.422737 | -0.142921 |
| C  | -1.489121 | -2.391889 | 0.070003  |
| C  | -0.325850 | -3.187449 | 0.157302  |
| C  | -0.393686 | -4.564589 | 0.380571  |
| C  | -1.643770 | -5.177043 | 0.485028  |
| C  | -2.817893 | -4.414097 | 0.373469  |
| C  | -2.735339 | -3.023095 | 0.174075  |
| N  | 0.864733  | -2.417020 | 0.015800  |
| C  | 0.675528  | -1.071242 | -0.149703 |
| N  | 1.903809  | -0.508012 | -0.297071 |
| C  | 2.896157  | -1.496976 | -0.195729 |
| C  | 2.216150  | -2.724918 | -0.079294 |
| C  | 4.320774  | -1.433634 | -0.274747 |
| C  | 4.955223  | -2.683432 | -0.597300 |
| C  | 4.234330  | -3.908851 | -0.522234 |
| C  | 2.891657  | -3.956398 | -0.207549 |
| C  | 5.163464  | -0.264270 | -0.083281 |
| C  | 6.456633  | -0.278933 | -0.673797 |
| C  | 7.000959  | -1.502072 | -1.178213 |
| C  | 6.313215  | -2.676969 | -1.046042 |
| C  | 4.823865  | 0.864612  | 0.771253  |
| C  | 5.636054  | 2.046048  | 0.726491  |
| C  | 6.819046  | 2.059287  | -0.080115 |
| C  | 7.242755  | 0.919132  | -0.702702 |
| C  | 3.797160  | 0.815727  | 1.753430  |
| C  | 3.523592  | 1.897591  | 2.573371  |
| C  | 4.262012  | 3.094672  | 2.449332  |
| C  | 5.306977  | 3.157185  | 1.546075  |
| C  | 2.084026  | 0.840101  | -0.836115 |
| O  | -3.986834 | -5.102150 | 0.478038  |
| C  | -5.210193 | -4.408762 | 0.369784  |
| O  | -0.827747 | 1.690055  | -0.327594 |
| H  | 2.371756  | -4.910627 | -0.143963 |
| H  | 4.773509  | -4.838483 | -0.725805 |
| H  | 6.772660  | -3.628199 | -1.331220 |
| H  | 8.010129  | -1.490750 | -1.600830 |
| H  | 8.199556  | 0.897851  | -1.233659 |
| H  | 7.417352  | 2.974625  | -0.123964 |
| H  | 5.923015  | 4.059339  | 1.474608  |
| H  | 4.028313  | 3.953128  | 3.086067  |
| H  | 2.733084  | 1.818137  | 3.325675  |
| H  | 3.223726  | -0.102166 | 1.888986  |
| H  | 0.502631  | -5.175411 | 0.490015  |
| H  | -1.728514 | -6.252958 | 0.655894  |
| H  | -3.635211 | -2.411404 | 0.099302  |
| H  | -5.326403 | -3.653901 | 1.171737  |
| H  | -6.004727 | -5.164583 | 0.471466  |
| H  | -5.312565 | -3.905901 | -0.611114 |
| H  | 1.255476  | 1.045484  | -1.526506 |
| H  | 3.038571  | 0.878836  | -1.378128 |
| H  | 2.080807  | 1.598250  | -0.041438 |

|   |           |           |           |
|---|-----------|-----------|-----------|
| H | -3.732389 | 3.299163  | -0.241059 |
| H | -5.306364 | -0.657266 | 1.102867  |
| H | -7.793155 | -0.753298 | 1.253846  |
| H | -9.179275 | 0.997050  | 0.132489  |
| H | -8.060403 | 2.838520  | -1.131715 |
| H | -5.593025 | 2.937601  | -1.267033 |
| H | 0.564842  | 3.413671  | -1.479663 |
| H | 1.498040  | 5.716311  | -1.648644 |
| H | 0.283127  | 7.634296  | -0.603992 |
| H | -1.865285 | 7.225406  | 0.604239  |
| H | -2.793423 | 4.939909  | 0.758058  |

### (P)-Pt2-IV

Total energy = -2071.745446 au

|    |           |           |           |
|----|-----------|-----------|-----------|
| Pt | -1.173492 | -0.418926 | -0.119723 |
| O  | -3.976172 | -5.076695 | 0.661974  |
| O  | -3.219519 | 0.016117  | -0.079547 |
| O  | -0.832702 | 1.696406  | -0.294126 |
| N  | 0.868254  | -2.412423 | 0.034508  |
| N  | 1.906018  | -0.504487 | -0.287681 |
| C  | 0.678640  | -1.066301 | -0.127407 |
| C  | 2.218054  | -2.721822 | -0.075210 |
| C  | 2.898320  | -1.494653 | -0.197678 |
| C  | 2.890043  | -3.954253 | -0.211954 |
| H  | 2.368655  | -4.907522 | -0.145108 |
| C  | 4.229676  | -3.908379 | -0.539508 |
| H  | 4.765476  | -4.838532 | -0.749515 |
| C  | 4.951651  | -2.683890 | -0.620017 |
| C  | 4.322200  | -1.433268 | -0.290675 |
| C  | 6.305460  | -2.679271 | -1.081210 |
| H  | 6.760838  | -3.631076 | -1.370948 |
| C  | 6.993785  | -1.505388 | -1.219187 |
| H  | 7.999071  | -1.495472 | -1.650989 |
| C  | 6.455944  | -0.281590 | -0.709488 |
| C  | 5.168402  | -0.265202 | -0.106828 |
| C  | 7.243404  | 0.915403  | -0.745783 |
| H  | 8.195158  | 0.892804  | -1.285682 |
| C  | 6.827053  | 2.056185  | -0.119411 |
| H  | 7.426087  | 2.970751  | -0.169026 |
| C  | 5.651715  | 2.044543  | 0.698340  |
| C  | 4.838532  | 0.864106  | 0.751002  |
| C  | 5.331815  | 3.156207  | 1.520828  |
| H  | 5.948235  | 4.057601  | 1.443326  |
| C  | 4.295469  | 3.095077  | 2.434070  |
| H  | 4.068924  | 3.953922  | 3.072871  |
| C  | 3.556957  | 1.898844  | 2.565478  |
| H  | 2.773704  | 1.820368  | 3.325433  |
| C  | 3.821368  | 0.816526  | 1.743111  |
| H  | 3.248317  | -0.100730 | 1.884448  |
| C  | -0.320554 | -3.181023 | 0.198101  |
| C  | -0.385679 | -4.554154 | 0.445768  |
| H  | 0.512008  | -5.164747 | 0.545598  |
| C  | -1.634086 | -5.161394 | 0.592780  |
| H  | -1.716728 | -6.233719 | 0.785823  |
| C  | -2.808814 | -4.396152 | 0.504814  |
| C  | -2.728316 | -3.009564 | 0.276449  |
| H  | -3.627678 | -2.394443 | 0.228442  |
| C  | -1.484121 | -2.385046 | 0.121576  |

|   |           |           |           |
|---|-----------|-----------|-----------|
| C | -5.198322 | -4.374095 | 0.613649  |
| H | -5.263263 | -3.606732 | 1.408935  |
| H | -5.991756 | -5.121797 | 0.769463  |
| H | -5.351767 | -3.884473 | -0.367689 |
| C | 2.081601  | 0.843800  | -0.827638 |
| H | 1.247307  | 1.049187  | -1.511184 |
| H | 3.031456  | 0.883042  | -1.377751 |
| H | 2.085121  | 1.601598  | -0.032616 |
| C | -3.780750 | 1.163348  | -0.133079 |
| C | -3.118821 | 2.403491  | -0.221922 |
| H | -3.747409 | 3.286230  | -0.318007 |
| C | -1.721609 | 2.608878  | -0.285047 |
| C | -5.280878 | 1.131690  | -0.125005 |
| C | -5.940799 | -0.002917 | -0.632732 |
| H | -5.342876 | -0.827774 | -1.027244 |
| C | -7.335331 | -0.069849 | -0.649141 |
| H | -7.832617 | -0.953519 | -1.061290 |
| C | -8.096366 | 0.989316  | -0.140680 |
| H | -9.189503 | 0.935213  | -0.147768 |
| C | -7.451738 | 2.116308  | 0.380539  |
| H | -8.038506 | 2.943381  | 0.792069  |
| C | -6.056215 | 2.189716  | 0.383427  |
| H | -5.569179 | 3.069065  | 0.812185  |
| C | -1.204176 | 4.016041  | -0.383069 |
| C | 0.023071  | 4.251860  | -1.029153 |
| H | 0.566245  | 3.405462  | -1.453585 |
| C | 0.535703  | 5.545526  | -1.141884 |
| H | 1.485570  | 5.710732  | -1.659917 |
| C | -0.161617 | 6.628064  | -0.593145 |
| H | 0.241818  | 7.642140  | -0.675880 |
| C | -1.375401 | 6.405736  | 0.066022  |
| H | -1.921052 | 7.244219  | 0.509805  |
| C | -1.894873 | 5.112205  | 0.165696  |
| H | -2.834422 | 4.954863  | 0.701165  |



### S3. References

- <sup>1</sup> K. Suzuki, A. Kobayashi, S. Kaneko, K. Takehira, T. Yoshihara, H. Ishida, Y. Shiina, S. Oishi, S. Tobita, *Phys. Chem. Chem. Phys.* **2009**, *11*, 9850–9860.
- <sup>2</sup> a) N. Hellou, M. Srebro-Hooper, L. Favereau, F. Zinna, E. Caytan, L. Toupet, V. Dorcet, M. Jean, N. Vanthuyne, J. A. G. Williams, L. Di Bari, J. Autschbach, J. Crassous, *Angew. Chem. Int. Ed.* **2017**, *56*, 8236–8239; b) A. Macé, N. Hellou, J. Hammoud, C. Martin, E. S. Gauthier, L. Favereau, T. Roisnel, E. Caytan, G. Nasser, N. Vanthuyne, J. A. G. Williams, F. Berrée, B. Carboni, J. Crassous, *Helv. Chim. Acta*, **2019**, *102*, e1900044.
- <sup>3</sup> E. S. Gauthier, L. Abella, N. Hellou, B. Darquié, E. Caytan, T. Roisnel, N. Vanthuyne, L. Favereau, M. Srebro-Hooper, J. A. G. Williams, J. Autschbach, J. Crassous, *Angew. Chem. Int. Ed.* **2020**, *59*, 8394–8400.
- <sup>4</sup> Gaussian 16, Revision C.01, M. J. Frisch, G. W. Trucks, H. B. Schlegel, G. E. Scuseria, M. A. Robb, J. R. Cheeseman, G. Scalmani, V. Barone, G. A. Petersson, H. Nakatsuji, X. Li, M. Caricato, A. V. Marenich, J. Bloino, B. G. Janesko, R. Gomperts, B. Mennucci, H. P. Hratchian, J. V. Ortiz, A. F. Izmaylov, J. L. Sonnenberg, D. Williams-Young, F. Ding, F. Lipparini, F. Egidi, J. Goings, B. Peng, A. Petrone, T. Henderson, D. Ranasinghe, V. G. Zakrzewski, J. Gao, N. Rega, G. Zheng, W. Liang, M. Hada, M. Ehara, K. Toyota, R. Fukuda, J. Hasegawa, M. Ishida, T. Nakajima, Y. Honda, O. Kitao, H. Nakai, T. Vreven, K. Throssell, J. A. Montgomery, Jr., J. E. Peralta, F. Ogliaro, M. J. Bearpark, J. J. Heyd, E. N. Brothers, K. N. Kudin, V. N. Staroverov, T. A. Keith, R. Kobayashi, J. Normand, K. Raghavachari, A. P. Rendell, J. C. Burant, S. S. Iyengar, J. Tomasi, M. Cossi, J. M. Millam, M. Klene, C. Adamo, R. Cammi, J. W. Ochterski, R. L. Martin, K. Morokuma, O. Farkas, J. B. Foresman, and D. J. Fox, Gaussian, Inc., Wallingford CT, 2016.
- <sup>5</sup> F. Weigend, R. Ahlrichs, *Phys. Chem. Chem. Phys.* **2005**, *7*, 3297–3305.
- <sup>6</sup> J. M. L. Martin, A. Sundermann, *J. Chem. Phys.* **2001**, *114*, 3408–3420.
- <sup>7</sup> D. Andrae, U. Häußermann, M. Dolg, H. Stoll, H. Preuß, *Theor. Chim. Acta* **1990**, *77*, 123–141.
- <sup>8</sup> J. Tomasi, B. Mennucci, R. Cammi, *Chem. Rev.* **2005**, *105*, 2999–3094.
- <sup>9</sup> M. Cossi, V. Barone, R. Cammi, J. Tomasi, *Chem. Phys. Lett.* **1996**, *255*, 327–335.
- <sup>10</sup> V. Barone, M. Cossi, *J. Phys. Chem. A* **1998**, *102*, 1995–2001.
- <sup>11</sup> M. Cossi, V. Barone, *J. Chem. Phys.* **2001**, *115*, 4708–4717.
- <sup>12</sup> G. Scalmani, M. J. Frisch, *J. Chem. Phys.* **2010**, *132*, 114110.
- <sup>13</sup> A. D. Becke, *J. Chem. Phys.* **1993**, *98*, 5648–5652.
- <sup>14</sup> C. Lee, W. Yang, R. G. Parr, *Phys. Rev. B*, **1988**, *37*, 785–789.
- <sup>15</sup> P. J. Stephens, F. J. Devlin, C. F. Chabalowski, M. J. Frisch, *J. Phys. Chem.* **1994**, *98*, 11623–11627.
- <sup>16</sup> A. D. Becke, *J. Chem. Phys.* **1993**, *98*, 1372–1377.
- <sup>17</sup> C. Adamo, V. Barone, *J. Chem. Phys.* **1999**, *110*, 6158–6169.
- <sup>18</sup> M. Ernzerhof, G. E. Scuseria, *J. Chem. Phys.* **1999**, *110*, 5029–5036.
- <sup>19</sup> GaussView, Version 5.0.9, R. Dennington, T. A. Keith, J. M. Millam, Semichem Inc., Shawnee Mission, KS, 2009.
- <sup>20</sup> T. Yanai, D. P. Tew, N. C. Handy, *Chem. Phys. Lett.* **2004**, *393*, 51–57.
- <sup>21</sup> I. Tamm, *J. Phys. USSR* **1945**, *9*, 449–460.

- 
- <sup>22</sup> S. M. Dancoff, *Phys. Rev.* **1950**, *78*, 382–385.
- <sup>23</sup> S. Hirata, M. Head-Gordon, *Chem. Phys. Lett.* **1999**, *314*, 291–299.
- <sup>24</sup> M. J. G. Peach, M. J. Williamson, D. J. Tozer, *J. Chem. Theory Comput.* **2011**, *7*, 3578–3585.
- <sup>25</sup> M. J. G. Peach, D. J. Tozer, *J. Phys. Chem. A* **2012**, *116*, 9783–9789.
- <sup>26</sup> M. J. G. Peach, N. Warner, D. J. Tozer, *Mol. Phys.* **2013**, *111*, 1271–1274.
- <sup>27</sup> C. Shen, E. Anger, M. Srebro, N. Vanthuyne, K. K. Deol, T. D. Jefferson, G. Muller, J. A. G. Williams, L. Toupet, C. Roussel, J. Autschbach, R. Reau, J. Crassous, *Chem. Sci.* **2014**, *5*, 1915–1927.
- <sup>28</sup> E. Anger, M. Srebro, N. Vanthuyne, C. Roussel, L. Toupet, J. Autschbach, R. Reau, J. Crassous, *Chem. Commun.* **2014**, *50*, 2854–2856.
- <sup>29</sup> N. Saleh, M. Srebro, T. Reynaldo, N. Vanthuyne, L. Toupet, V. Y. Chang, G. Muller, J. A. G. Williams, C. Roussel, J. Autschbach, J. Crassous, *Chem. Commun.* **2015**, *51*, 3754–3757.
- <sup>30</sup> H. D. Ludowieg, M. Srebro-Hooper, J. Crassous, J. Autschbach, *Chemistry Open*, **2022**, *11*, e202200020.
